# Supplementary material
Source: PubMed Central journal article supplement (PMC4782195)
Supplement: NIHMS665443-supplement-Supplementary_Data.pdf [file NIHMS665443-supplement-Supplementary_Data.pdf]

## Supplementary Data

### Mechanistic Considerations in the Synthesis of 2-Aryl-Indole Analogues under Bischler-Mohlau Conditions

Matthew T. MacDonough<sup>a</sup>, Zhe Shi<sup>a</sup>, and Kevin G. Pinney<sup>a,\*</sup>

<sup>a</sup>Department of Chemistry and Biochemistry, Baylor University, One Bear Place #97348,  
Waco, Texas 76798-7348, United States of America (USA)

\*Corresponding author. Tel.: 254-710-4117

Email address: [Kevin\\_Pinney@baylor.edu](mailto:Kevin_Pinney@baylor.edu)

## Table of Contents

|                                                                                                          |               |
|----------------------------------------------------------------------------------------------------------|---------------|
| Experimental Procedures                                                                                  | Pages S3-S9   |
| NMR Spectra, HPLC Traces, and HRMS Data for Compounds                                                    | Pages S10-S34 |
| DEPT NMR for $^{13}\text{C}$ Labeled Indole <b>16</b>                                                    | Page S35      |
| Predicted (ChemBioDraw, Version 13.0.2.3020) $^{13}\text{C}$ NMR Values for Possible Indole Regioisomers | Pages S36-S37 |
| X-ray Crystallographic Data for $^{13}\text{C}$ Labeled Indole <b>16</b>                                 | Pages S38-S44 |

## Experimental Procedures

CH<sub>2</sub>Cl<sub>2</sub>, THF, EtOH, and Et<sub>2</sub>O were used in their anhydrous forms as obtained from the chemical suppliers. Reactions were performed under an inert atmosphere using nitrogen gas, unless specified otherwise. Thin-layer chromatography (TLC) plates (precoated glass plates with silica gel 60 F254, 0.25 mm thickness) were used to monitor reactions. Purification of intermediates and products was carried out with a flash purification system (Biotage Isolera 1 or 4) using silica gel (200-400 mesh, 60 Å) prepacked columns. Intermediates and products synthesized were characterized on the basis of their <sup>1</sup>H NMR (500 MHz), <sup>13</sup>C NMR (125 MHz), and DEPT <sup>13</sup>C NMR (125 MHz) spectroscopic data using a Varian VNMRS 500 MHz instrument. Spectra were recorded in CDCl<sub>3</sub>. All of the chemical shifts are expressed in ppm (δ), coupling constants (*J*) are presented in Hz, and peak patterns are reported as broad (br), singlet (s), doublet (d), double doublet (dd), quartet of doublets (qd) quartet (q), and multiplet (m). <sup>13</sup>C-labeled atoms have their <sup>13</sup>C-NMR chemical shift values denoted with bold text in each appropriate experimental write-up.

### *3-(tert-Butyldimethylsilyloxy)-4-methoxybenzaldehyde 11*

To a clean dry round bottom flask 3-hydroxy-4-methoxybenzaldehyde **10** (5.02 g, 32.9 mmol) was dissolved in CH<sub>2</sub>Cl<sub>2</sub> (100 mL). The solution was cooled to 0 °C and Et<sub>3</sub>N (5.04 mL, 36.2 mmol) was added followed by the addition of *N,N*-dimethylaminopyridine (DMAP) (0.402 g, 3.29 mmol). The reaction mixture was stirred for 10 min and *tert*-butyldimethylsilyl chloride (TBSCl) (5.29 g, 36.2 mmol) was added

gradually. The solution was allowed to warm to room temperature and was stirred for 12 hours. The reaction was diluted with water (50 mL), transferred to a separatory funnel, and was extracted with CH<sub>2</sub>Cl<sub>2</sub>. The organic extracts were combined, dried over Na<sub>2</sub>SO<sub>4</sub>, filtered, and concentrated under reduced pressure. The TBS benzaldehyde product **11** (9.24 g, 34.7 mmol) was isolated quantitatively as a yellow oil and was taken to the next step without further purification.

<sup>1</sup>H NMR (CDCl<sub>3</sub>, 500 MHz): δ 9.80 (s, 1H, CHO), 7.45 (dd, *J* = 8.5, 2.0 Hz, 1H, ArH), 7.35 (d, *J* = 2.0 Hz, 1H, ArH), 6.93 (d, *J* = 8.5 Hz, 1H, ArH), 3.87 (s, 3H, OCH<sub>3</sub>), 0.99 (s, 9H, C(CH<sub>3</sub>)<sub>3</sub>), 0.16 (s, 6H, Si(CH<sub>3</sub>)<sub>2</sub>).

<sup>13</sup>C NMR (CDCl<sub>3</sub>, 125 MHz): δ 190.2, 156.2, 145.2, 130.0, 126.0, 119.4, 110.9, 55.1, 25.3, 18.0, -5.0.

### *3-tert-Butyldimethylsilyloxy-1-(1'-hydroxyethyl)-4-methoxybenzene 12*

To a solution of magnesium turnings (0.40 g, 17 mmol) in diethyl ether (Et<sub>2</sub>O) was added <sup>13</sup>C-labeled methyl iodide (1.00 mL, 16.0 mmol). The solution was refluxed for 30 minutes until the turnings were dissolved. The solution was cooled to room temperature and TBS benzaldehyde **11** (1.92 g, 7.20 mmol) in Et<sub>2</sub>O was added dropwise. The reaction mixture was stirred for 5 hours. Upon completion the reaction mixture was slowly quenched with 0.1 M HCl and extracted with Et<sub>2</sub>O. The organic extracts were washed sequentially with saturated NaHCO<sub>3</sub> solution and water. The organic layer was further dried over Na<sub>2</sub>SO<sub>4</sub>, filtered, and concentrated under reduced pressure. The crude mixture was subjected to flash chromatography using a prepacked 50 g silica column

[solvent A, EtOAc, solvent B, hexanes; gradient, 7%A / 93%B (1 CV), 7%A / 93%B → 60%A / 40%B (10 CV), 60%A / 40%B (2 CV); flow rate, 40 mL/min; monitored at 254 and 280 nm] to yield <sup>13</sup>C-labeled alcohol **12** (1.54 g, 5.45 mmol, 75%, R<sub>f</sub> = 0.47 (70:30 hexanes:EtOAc)) as a yellow oil.

<sup>1</sup>H NMR (CDCl<sub>3</sub>, 500 MHz): δ 6.90 (dd, *J* = 8.2, 2.2 Hz, 1H, ArH), 6.88 (d, *J* = 2.2 Hz, 1H, ArH), 6.81 (d, *J* = 8.2 Hz, 1H, ArH), 4.79 (qd, *J* = 6.4, 2.0 Hz, 1H, CH), 3.79 (s, 3H, OCH<sub>3</sub>), 1.79 (s, 1H, OH), 1.45 (dd, *J* = 6.4 Hz, *J*<sub>C-H</sub> = 126.6 Hz, 3H, CH<sub>3</sub>), 1.00 (s, 9H, C(CH<sub>3</sub>)<sub>3</sub>), 0.16 (s, 6H, Si(CH<sub>3</sub>)<sub>2</sub>).

<sup>13</sup>C NMR (CDCl<sub>3</sub>, 500 MHz): δ 150.30, 145.02, 138.64, 118.50 (d, *J* = 1.9 Hz), 118.27 (d, *J* = 1.6 Hz), 111.96, 69.96 (d, *J* = 38.6 Hz), 55.56, 25.73, **24.96**, 18.45, -4.59 (d, *J* = 1.4 Hz).

HRMS [M+Na]<sup>+</sup>: 306.1578 (calcd for [C<sub>14</sub><sup>13</sup>CH<sub>26</sub>NaO<sub>3</sub>Si]<sup>+</sup>, 306.1577).

### *3-tert-Butyldimethylsilyloxy-4-methoxyacetophenone 13*

The crude alcohol **12** (1.76 g, 6.23 mmol) was dissolved in CH<sub>2</sub>Cl<sub>2</sub> (50 mL). Celite (1.5 g) was added and the solution was cooled to 0 °C. Pyridinium chlorochromate (PCC) (1.48 g, 6.86 mmol) was added in small increments allowing 10 minutes of stirring between each addition. The reaction was allowed to warm to room temperature and stirred for 12 hours. The reaction mixture was filtered through a 50/50 mixture of silica

gel/celite rinsing well with CH<sub>2</sub>Cl<sub>2</sub>. The filtrate was concentrated under reduced pressure providing the desired <sup>13</sup>C-labeled acetophenone **13** (1.48 g, 5.28 mmol, 85%) as a pale yellow solid.

<sup>1</sup>H NMR (CDCl<sub>3</sub>, 500 MHz): δ 7.58 (dd, *J* = 8.5, 2.1 Hz, 1H, ArH), 7.47 (d, *J* = 1.9 Hz, 1H, ArH), 6.87 (d, *J* = 8.3 Hz, 1H, ArH), 3.87 (s, 3H, OCH<sub>3</sub>), 2.53 (d, *J* = 127.3 Hz, 3H, CH<sub>3</sub>), 1.01 (s, 9H, C(CH<sub>3</sub>)<sub>3</sub>), 0.17 (s, 6H, Si(CH<sub>3</sub>)<sub>2</sub>).

<sup>13</sup>C NMR (CDCl<sub>3</sub>, 500 MHz): δ 196.71 (d, *J* = 42.7 Hz), 155.31, 144.83, 130.59 (d, *J* = 13.9 Hz), 123.50, 120.47, 110.78, 55.48, **26.30**, 25.68, 18.44, -4.63.

HRMS [M+H]<sup>+</sup>: 282.1603 (calcd for [C<sub>14</sub><sup>13</sup>CH<sub>25</sub>O<sub>3</sub>Si]<sup>+</sup>, 282.1601).

#### *1-(3-tert-Butyldimethylsilyloxy-4-methoxyphenyl)-1-trimethylsilylethene 14*

To a solution of diisopropylamine (1.1 mL, 7.0 mmol) in THF (30 mL) at 0 °C was added *n*-butyllithium (3.2 mL, 7.9 mmol) dropwise. The LDA solution was allowed to stir for 15 minutes and a solution of TBS acetophenone **13** (1.48 g, 5.26 mmol) in THF (5 mL) was added dropwise. The solution was stirred for 10 min and TMSCl (1.0 mL, 7.9 mmol) was added dropwise and the reaction was allowed to warm to room temperature. The solution was stirred for 12 hours and was quenched using 10% NaHCO<sub>3</sub> (100 mL). The reaction mixture was extracted with Et<sub>2</sub>O, dried over Na<sub>2</sub>SO<sub>4</sub>, and concentrated under reduced pressure resulting in <sup>13</sup>C-labeled TMS enol ether **14**

(1.95 g, 5.51 mmol) quantitatively as a dark yellow oil which was taken to the next step without purification.

<sup>1</sup>H NMR (CDCl<sub>3</sub>, 500 MHz): δ 7.23 (dd, *J* = 8.5, 2.0 Hz, 1H ArH), 7.18 (d, *J* = 2.0 Hz, 1H, ArH), 6.82 (d, *J* = 8.5 Hz, 1H, ArH), 4.83 (dd, *J* = 1.5 Hz, *J*<sub>C-H</sub> = 159.5 Hz, 1H, CH<sub>2</sub>), 4.38 (dd, *J* = 1.5 Hz, *J*<sub>C-H</sub> = 159.0 Hz, 1H, CH<sub>2</sub>), 3.83 (s, 3H, OCH<sub>3</sub>), 1.08 (s, 9H, C(CH<sub>3</sub>)<sub>3</sub>), 0.32 (s, 9H, Si(CH<sub>3</sub>)<sub>3</sub>), 0.23 (s, 6H, Si(CH<sub>3</sub>)<sub>2</sub>).

<sup>13</sup>C NMR (CDCl<sub>3</sub>, 125 MHz): δ 155.4 (d, *J* = 82.0 Hz), 151.3, 144.6, 130.8 (d, *J* = 6.9 Hz), 118.9 (d, *J* = 2.4 Hz), 118.2 (d, *J* = 2.3 Hz), 111.3 (d, *J* = 42.6 Hz), **89.6**, 55.5, 25.9, 18.6, 0.2, -4.5.

### *3'-(tert-Butyldimethylsilyloxy)-4'-methoxy-2-bromoacetophenone 15*

A solution of crude **14** (1.95 g, 5.51 mmol) in CH<sub>2</sub>Cl<sub>2</sub> (30 mL) and K<sub>2</sub>CO<sub>3</sub> (0.033 g, 0.239 mmol) was cooled to 0 °C. Bromine (0.17 mL, 3.3 mmol) was added dropwise and the solution was allowed to stir for 30 minutes. The reaction was quenched with 10 % sodium thiosulfate solution, transferred to a separatory funnel, and extracted with CH<sub>2</sub>Cl<sub>2</sub>. The organic extracts were dried over Na<sub>2</sub>SO<sub>4</sub> and concentrated under reduced pressure. The crude mixture was subjected to flash chromatography using a prepacked 100 g silica column [solvent A, EtOAc, solvent B, hexanes; gradient, 2%A / 98%B (4 CV), 2%A / 98%B → 20%A / 80%B (10 CV), 20%A / 80%B (2 CV); flow rate, 50

mL/min; monitored at 254 and 280 nm] to yield <sup>13</sup>C-labeled bromoacetophenone **15** as a tan solid (1.16 g, 3.22 mmol, 58%, R<sub>f</sub> = 0.29 (80:20 hexanes:EtOAc)).

<sup>1</sup>H NMR (CDCl<sub>3</sub>, 500 MHz): δ 7.62 (dd, *J* = 8.5, 2.2 Hz, 1H, ArH), 7.49 (d, *J* = 2.2 Hz, 1H, ArH), 6.89 (d, *J* = 8.5 Hz, 1H, ArH), 4.38 (d, *J*<sub>C-H</sub> = 150.9 Hz, 2H, CH<sub>2</sub>), 3.89 (s, 3H, OCH<sub>3</sub>), 1.01 (s, 9H, C(CH<sub>3</sub>)<sub>3</sub>), 0.18 (s, 6H, Si(CH<sub>3</sub>)<sub>2</sub>).

<sup>13</sup>C NMR (CDCl<sub>3</sub>, 500 MHz): δ 189.89 (d, *J* = 43.8 Hz), 156.10, 145.13, 127.12 (d, *J* = 17.2 Hz), 124.21, 121.10, 111.00, 55.55, **30.69**, 25.65, 18.43, -4.61.

HRMS [M+Na]<sup>+</sup>: 382.0533 (calcd for [C<sub>14</sub><sup>13</sup>CH<sub>23</sub>BrNaO<sub>3</sub>Si]<sup>+</sup>, 382.0526).

#### *2-(3'-tert-Butyldimethylsilyloxy-4'-methoxyphenyl)-6-methoxyindole 16*

A solution of *m*-anisidine (0.41 mL, 3.7 mmol) was dissolved in *N,N*-dimethylaniline (10 mL) and was heated to reflux at 170 °C. A solution of **15** (0.40 g, 1.1 mmol) in EtOAc (1 mL) was added dropwise. The reaction mixture was stirred at 170 °C for 12 hours. The reaction mixture was allowed to cool to room temperature and was extracted with EtOAc (3 x 50 mL). The combined organic extracts were dried over Na<sub>2</sub>SO<sub>4</sub> and concentrated under reduced pressure. Purification by flash chromatography using a prepacked 50 g silica column [solvent A, EtOAc, solvent B, hexanes; gradient, 2%A / 98%B (1 CV), 2%A / 98%B → 25%A / 75%B (10 CV), 25%A / 75%B (2 CV); flow rate, 40 mL/min; monitored at 254 and 280 nm] resulted in the desired <sup>13</sup>C-labeled phenylindole **16** (0.312 g, 0.81 mmol, 73%, R<sub>f</sub> = 0.48 (50:50 hexanes:EtOAc)) as a light



tan solid. A portion of compound **16** was recrystallized from hexane and dichloromethane to obtain the analytical data.

**<sup>1</sup>H NMR** (CDCl<sub>3</sub>, 500 MHz): δ 8.14 (br s, 1H, NH), 7.48 (dd, *J* = 8.6 Hz, 2.9 Hz, 1H, ArH), 7.16 (m, 2H, ArH), 6.90 (m, 2H, ArH), 6.83 – 6.40 (m, 2H, ArH), 3.87 (s, 3H, OCH<sub>3</sub>), 3.85 (s, 3H, OCH<sub>3</sub>), 1.06 (s, 9H, C(CH<sub>3</sub>)<sub>3</sub>), 0.22 (s, 6H, Si(CH<sub>3</sub>)<sub>2</sub>).

**<sup>13</sup>C NMR** (CDCl<sub>3</sub>, 125 MHz): δ 156.36 , 150.57 , 145.39 , 137.37 (d, *J* = 3.3 Hz), 136.85, 125.77 (d, *J* = 3.6 Hz), 123.68 (d, *J* = 56.5 Hz), 120.89 (d, *J* = 2.4 Hz), 118.18 (d, *J* = 2.9 Hz), 117.81 (d, *J* = 2.5 Hz), 112.36 , 109.89 (d, *J* = 4.6 Hz), **98.68**, 94.46 (d, *J* = 2.4 Hz), 55.68 , 55.53 , 25.75 , 18.49 , -4.57 .

**HRMS** [M+H]<sup>+</sup>: 385.2031 (calcd for [C<sub>21</sub><sup>13</sup>CH<sub>30</sub>NO<sub>3</sub>Si]<sup>+</sup>, 385.2023).

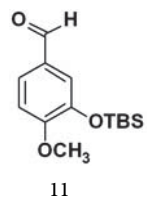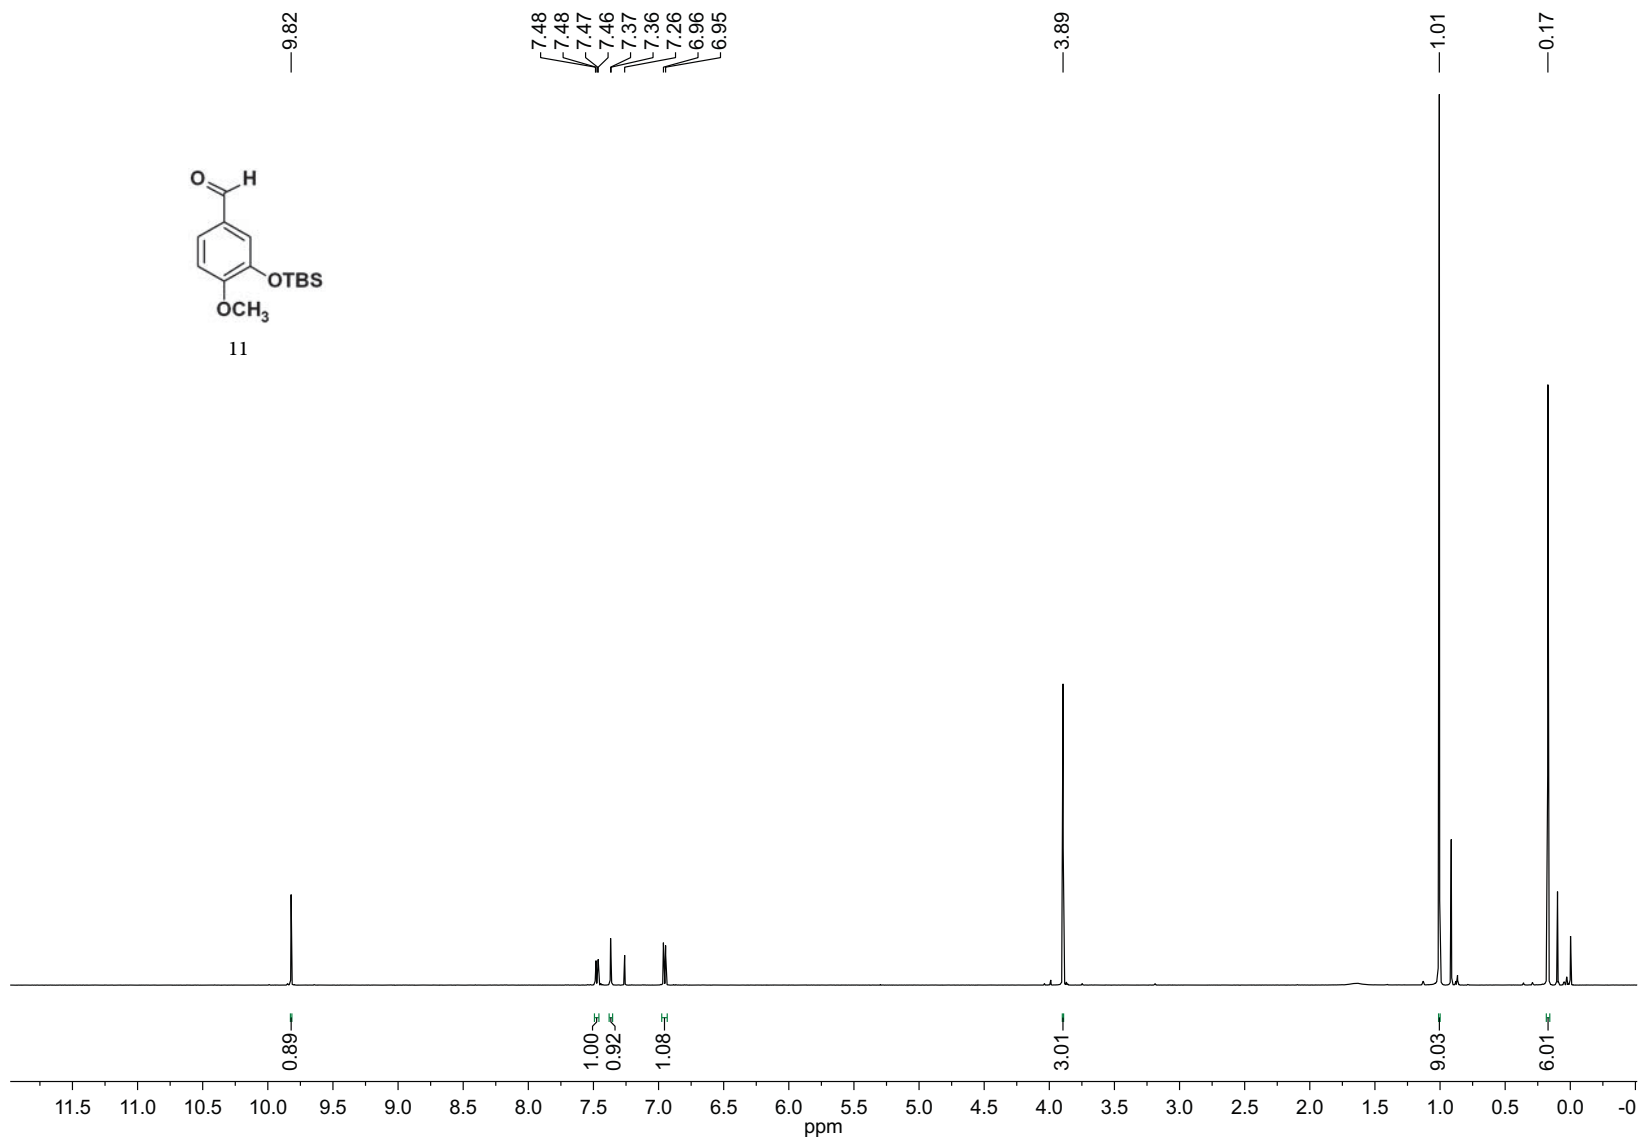

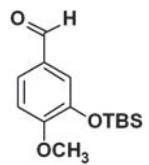

11

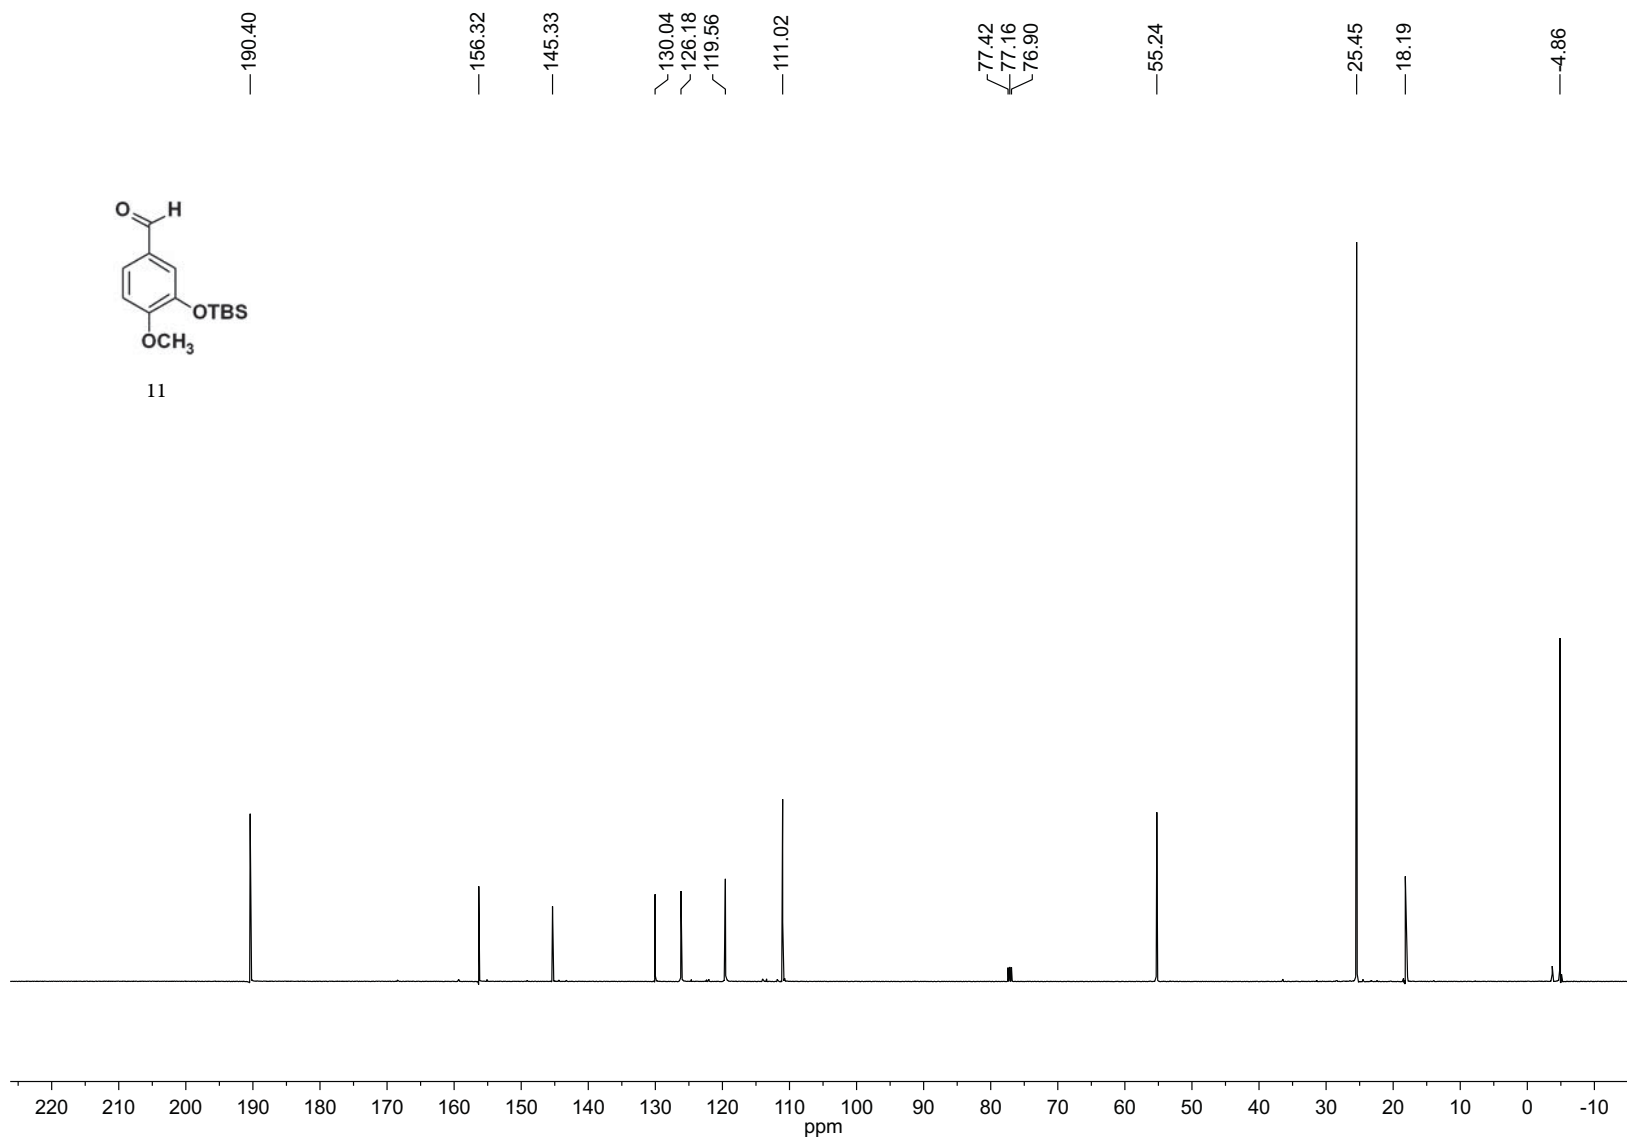

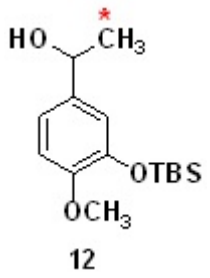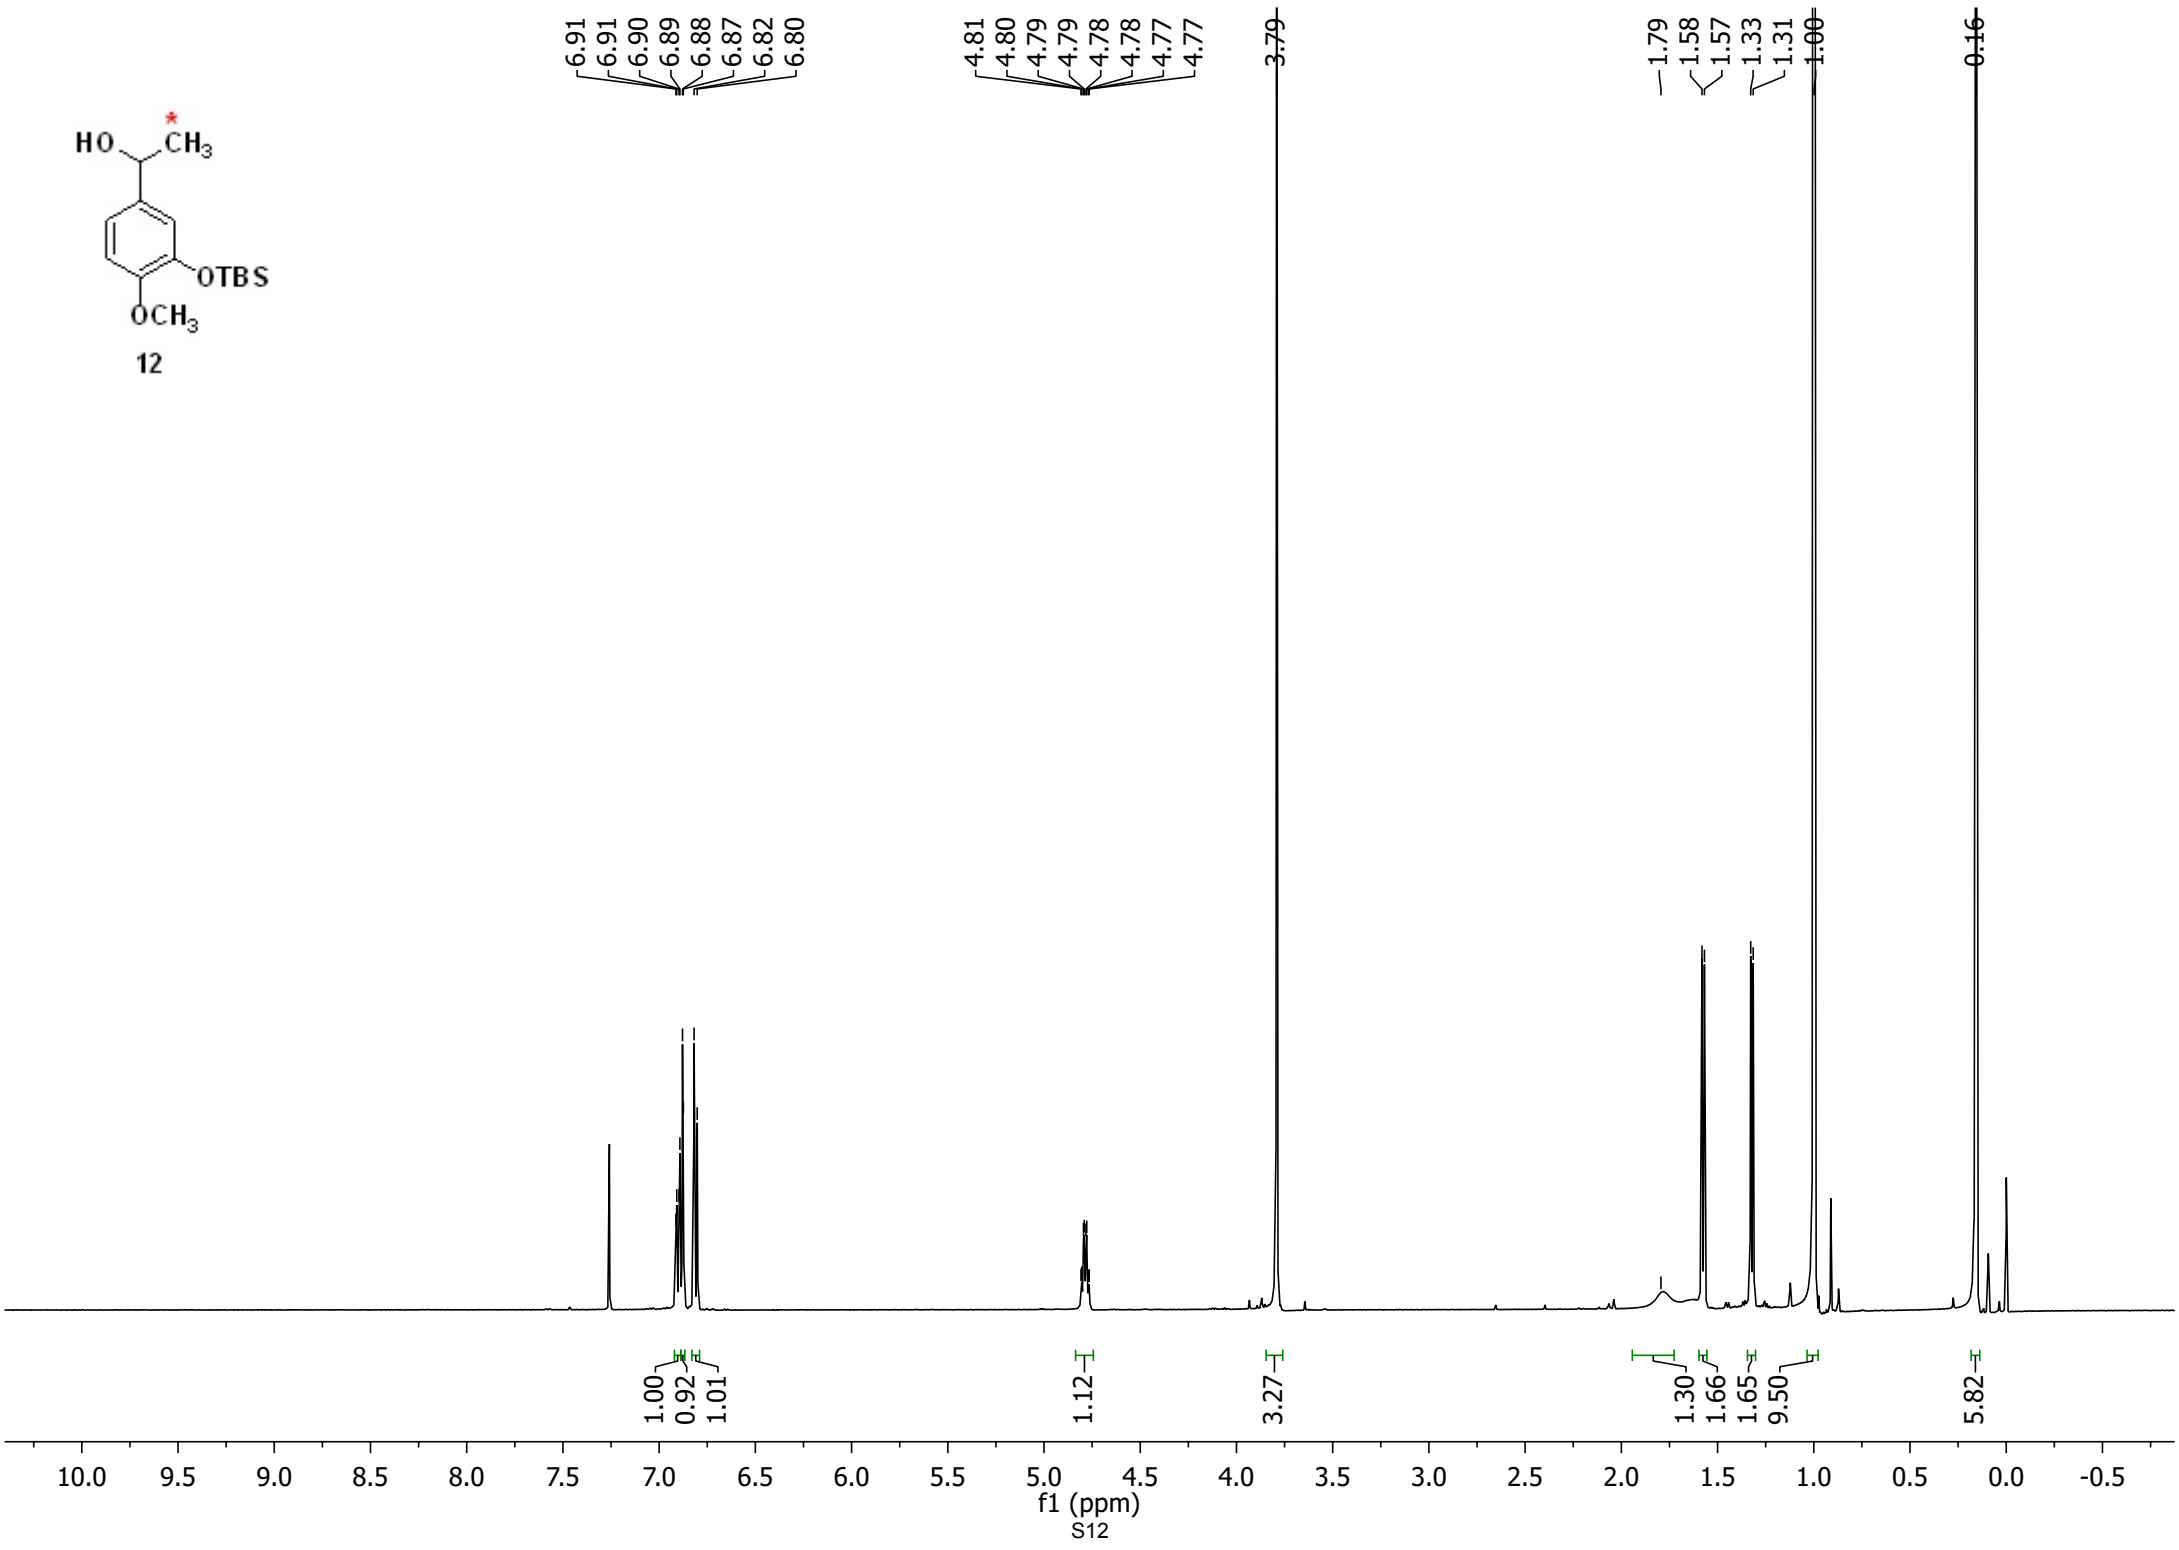

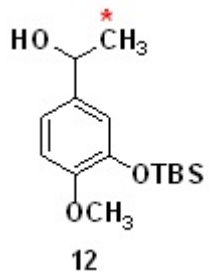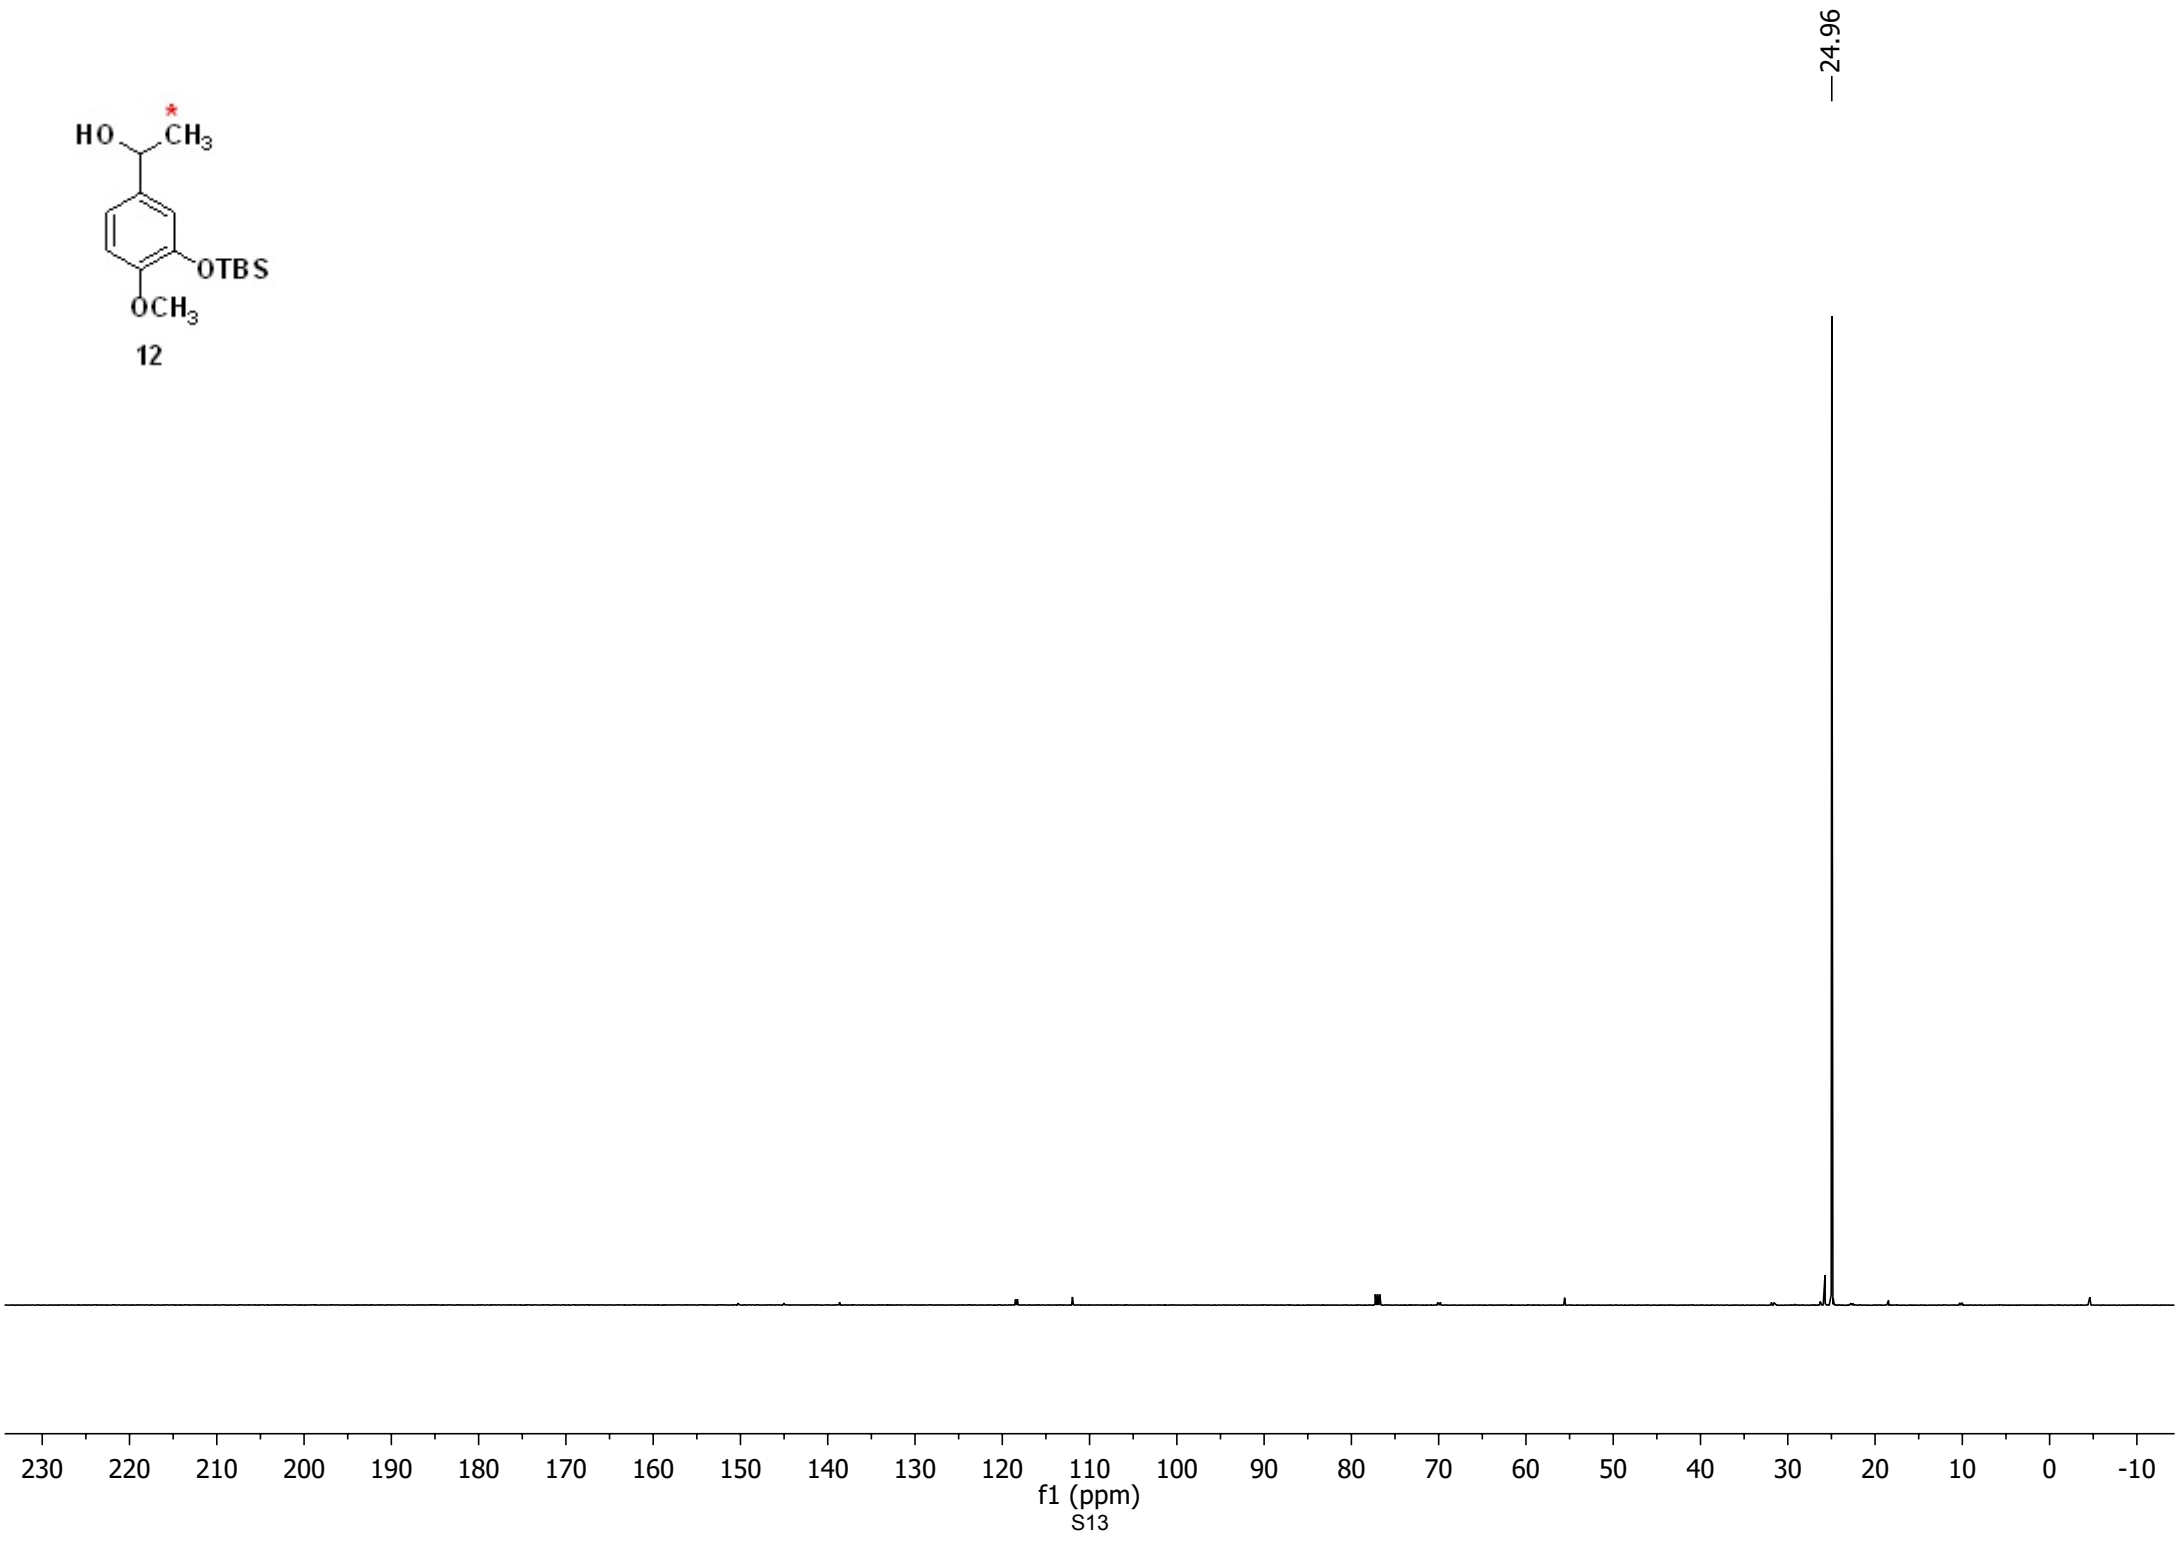

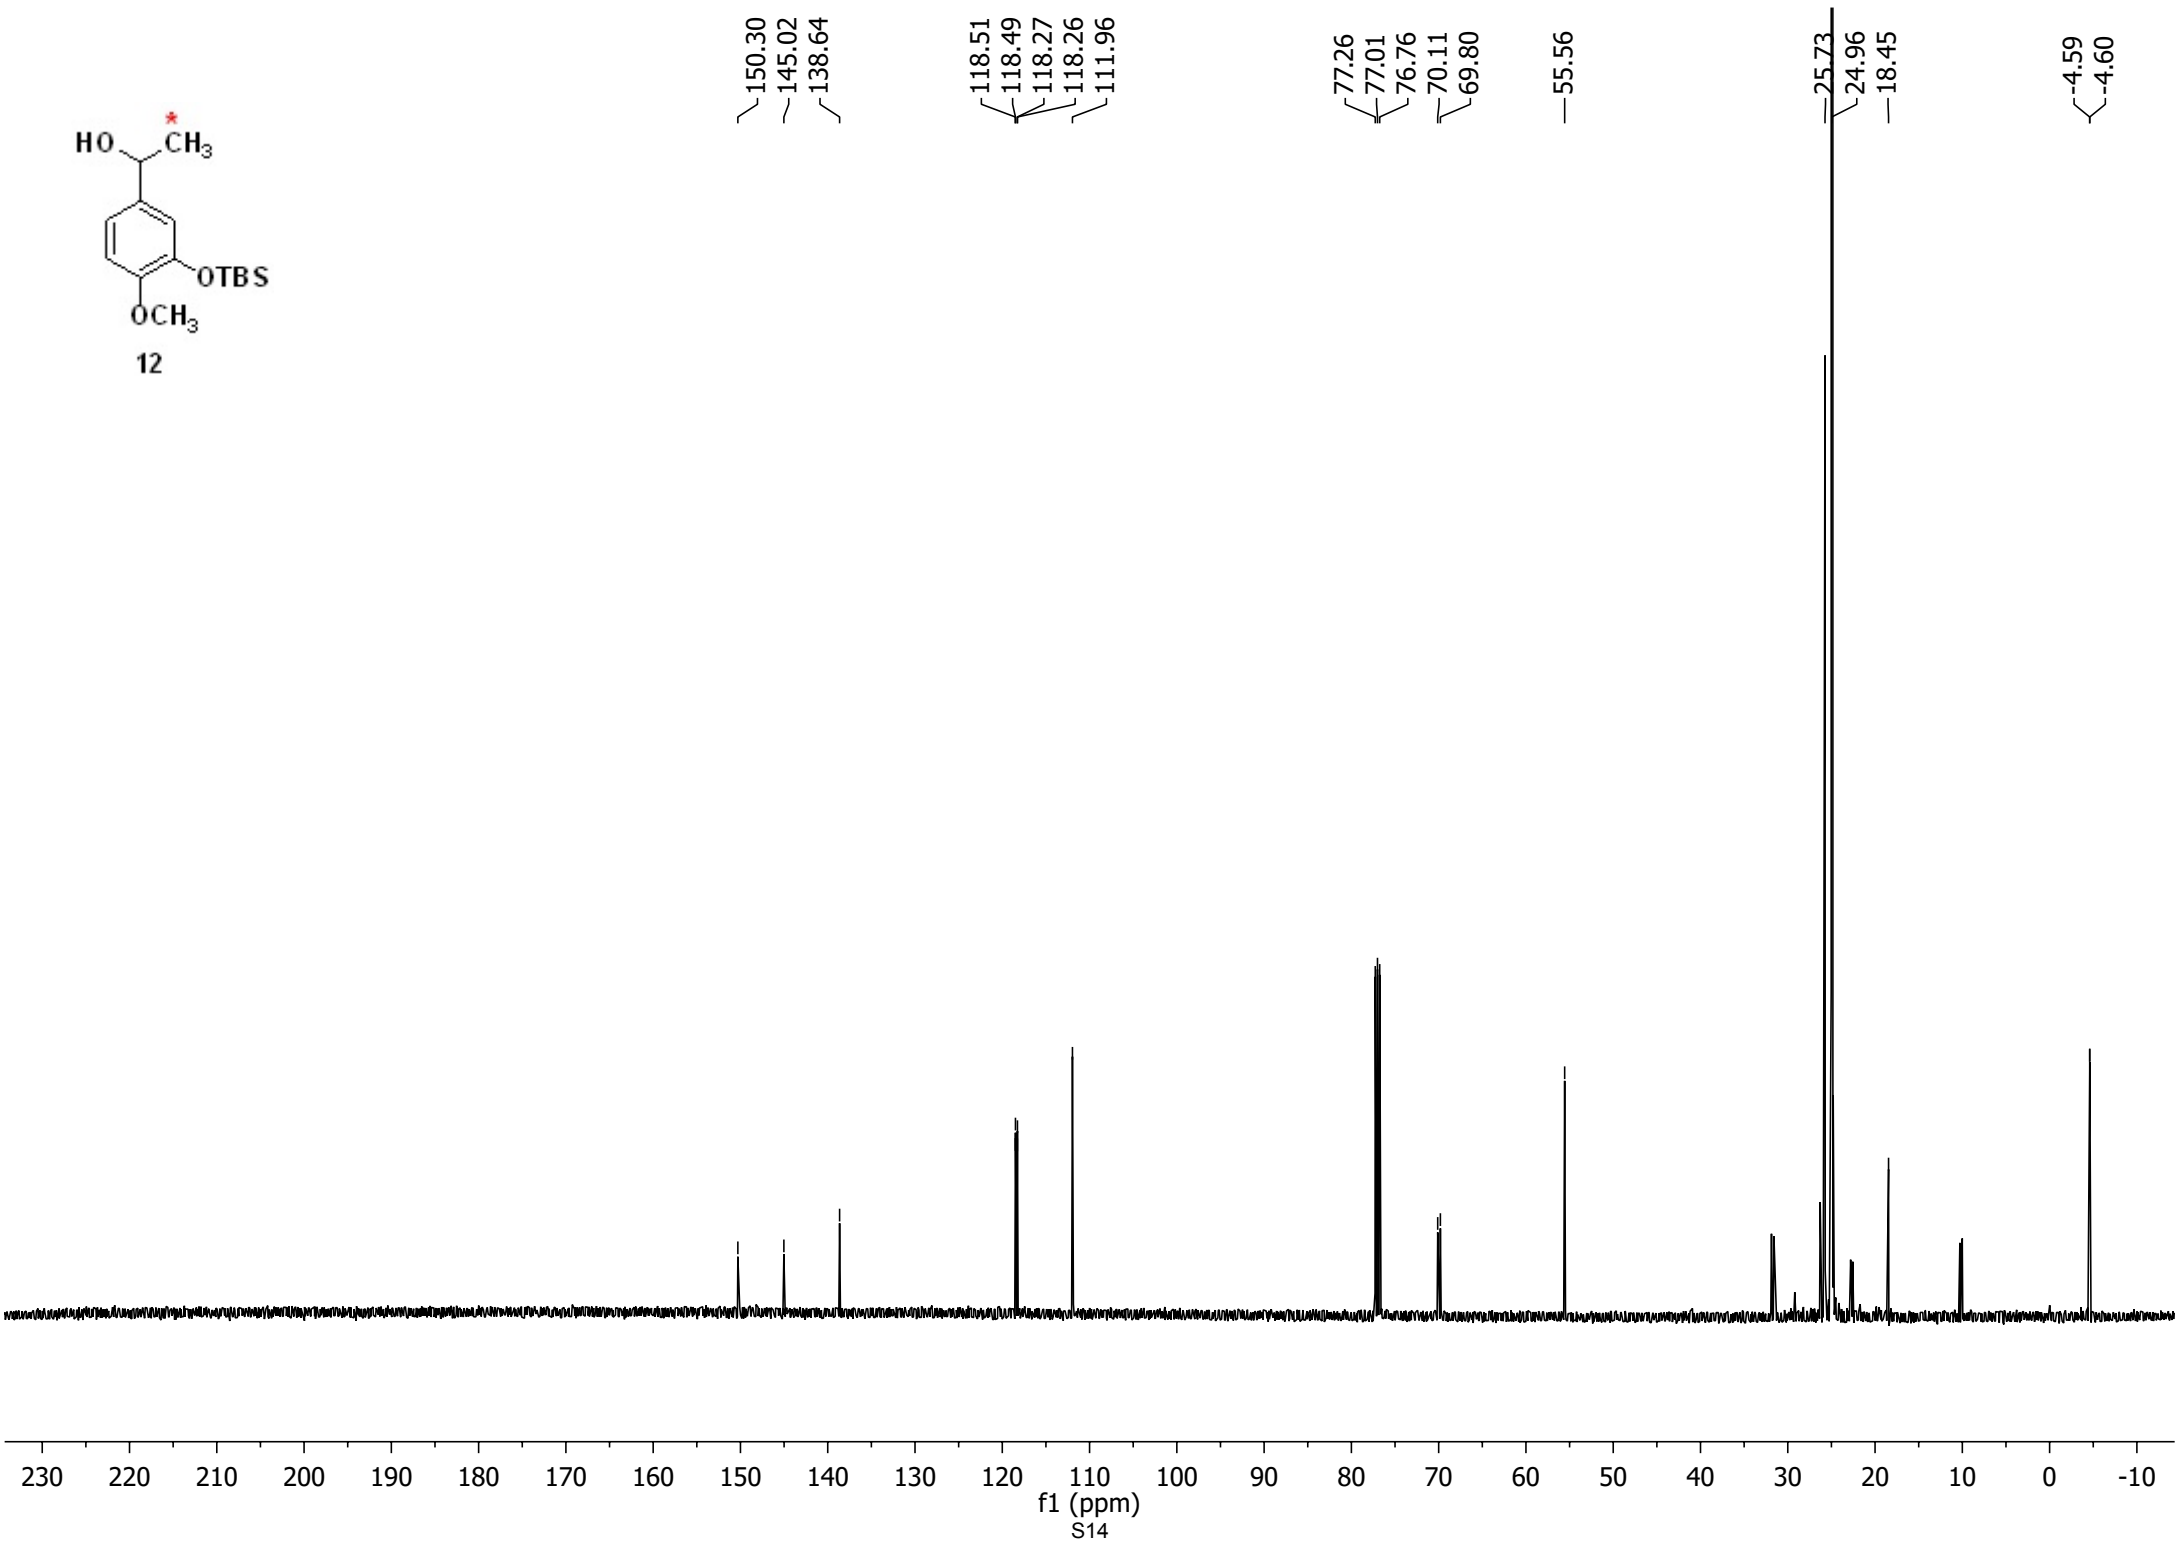

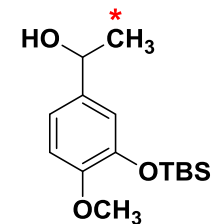

12

C:\Xcalibur\...MTM-IV-35\_Orbi\_+ESI  
in MEOH

8/14/2013 2:53:57 PM

MTM-IV-35

MTM-IV-35\_Orbi\_+ESI #50 RT: 0.39 AV: 1 NL:  
T: FTMS + p ESI Full ms [160.00-500.00]

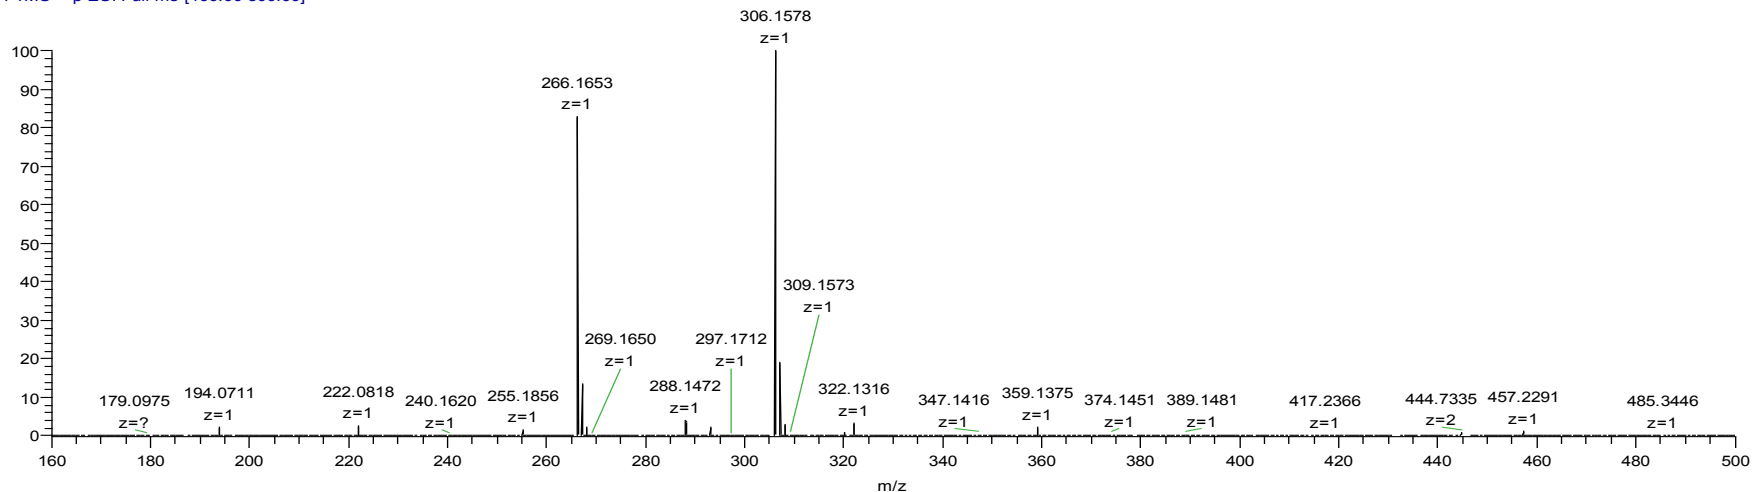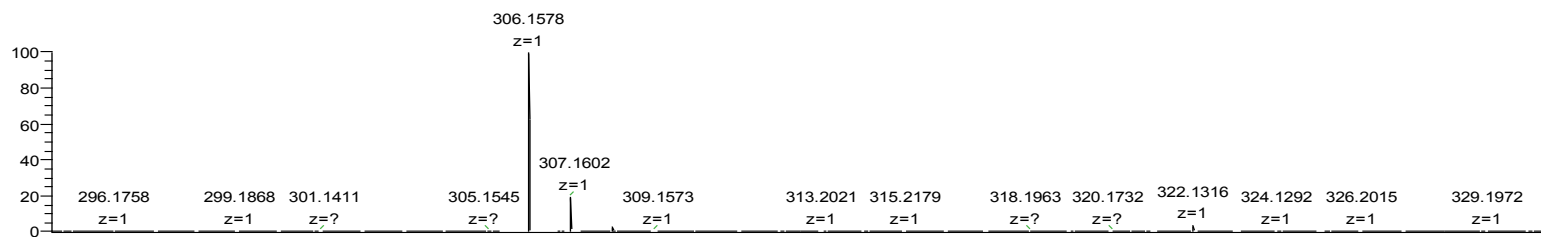

NL:  
1.41E9  
MTM-IV-35\_Orbi\_+  
ESI#50 RT: 0.39  
AV: 1 T: FTMS + p  
ESI Full ms  
[160.00-500.00]

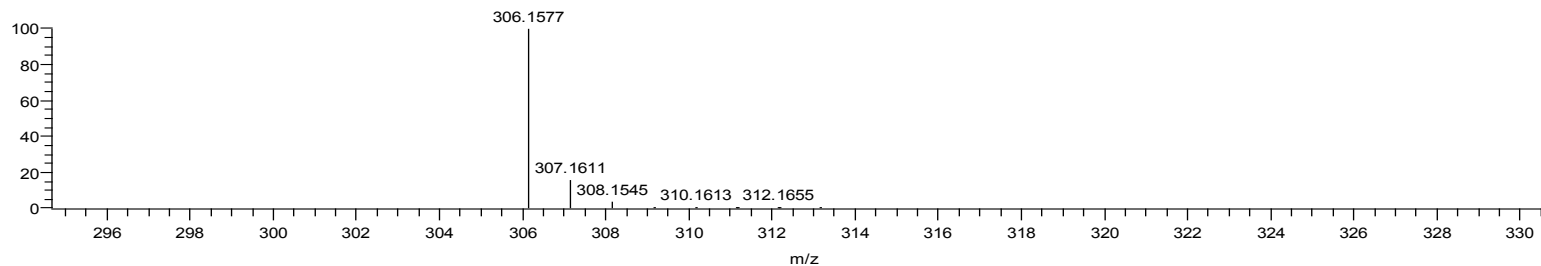

NL:  
7.85E5  
C<sub>14</sub> <sup>13</sup>C<sub>26</sub> NaO<sub>3</sub> Si:  
C<sub>14</sub> <sup>13</sup>C<sub>1</sub>H<sub>26</sub> Na<sub>1</sub>O<sub>3</sub> Si<sub>1</sub>  
pa Chrg 1

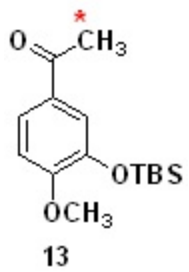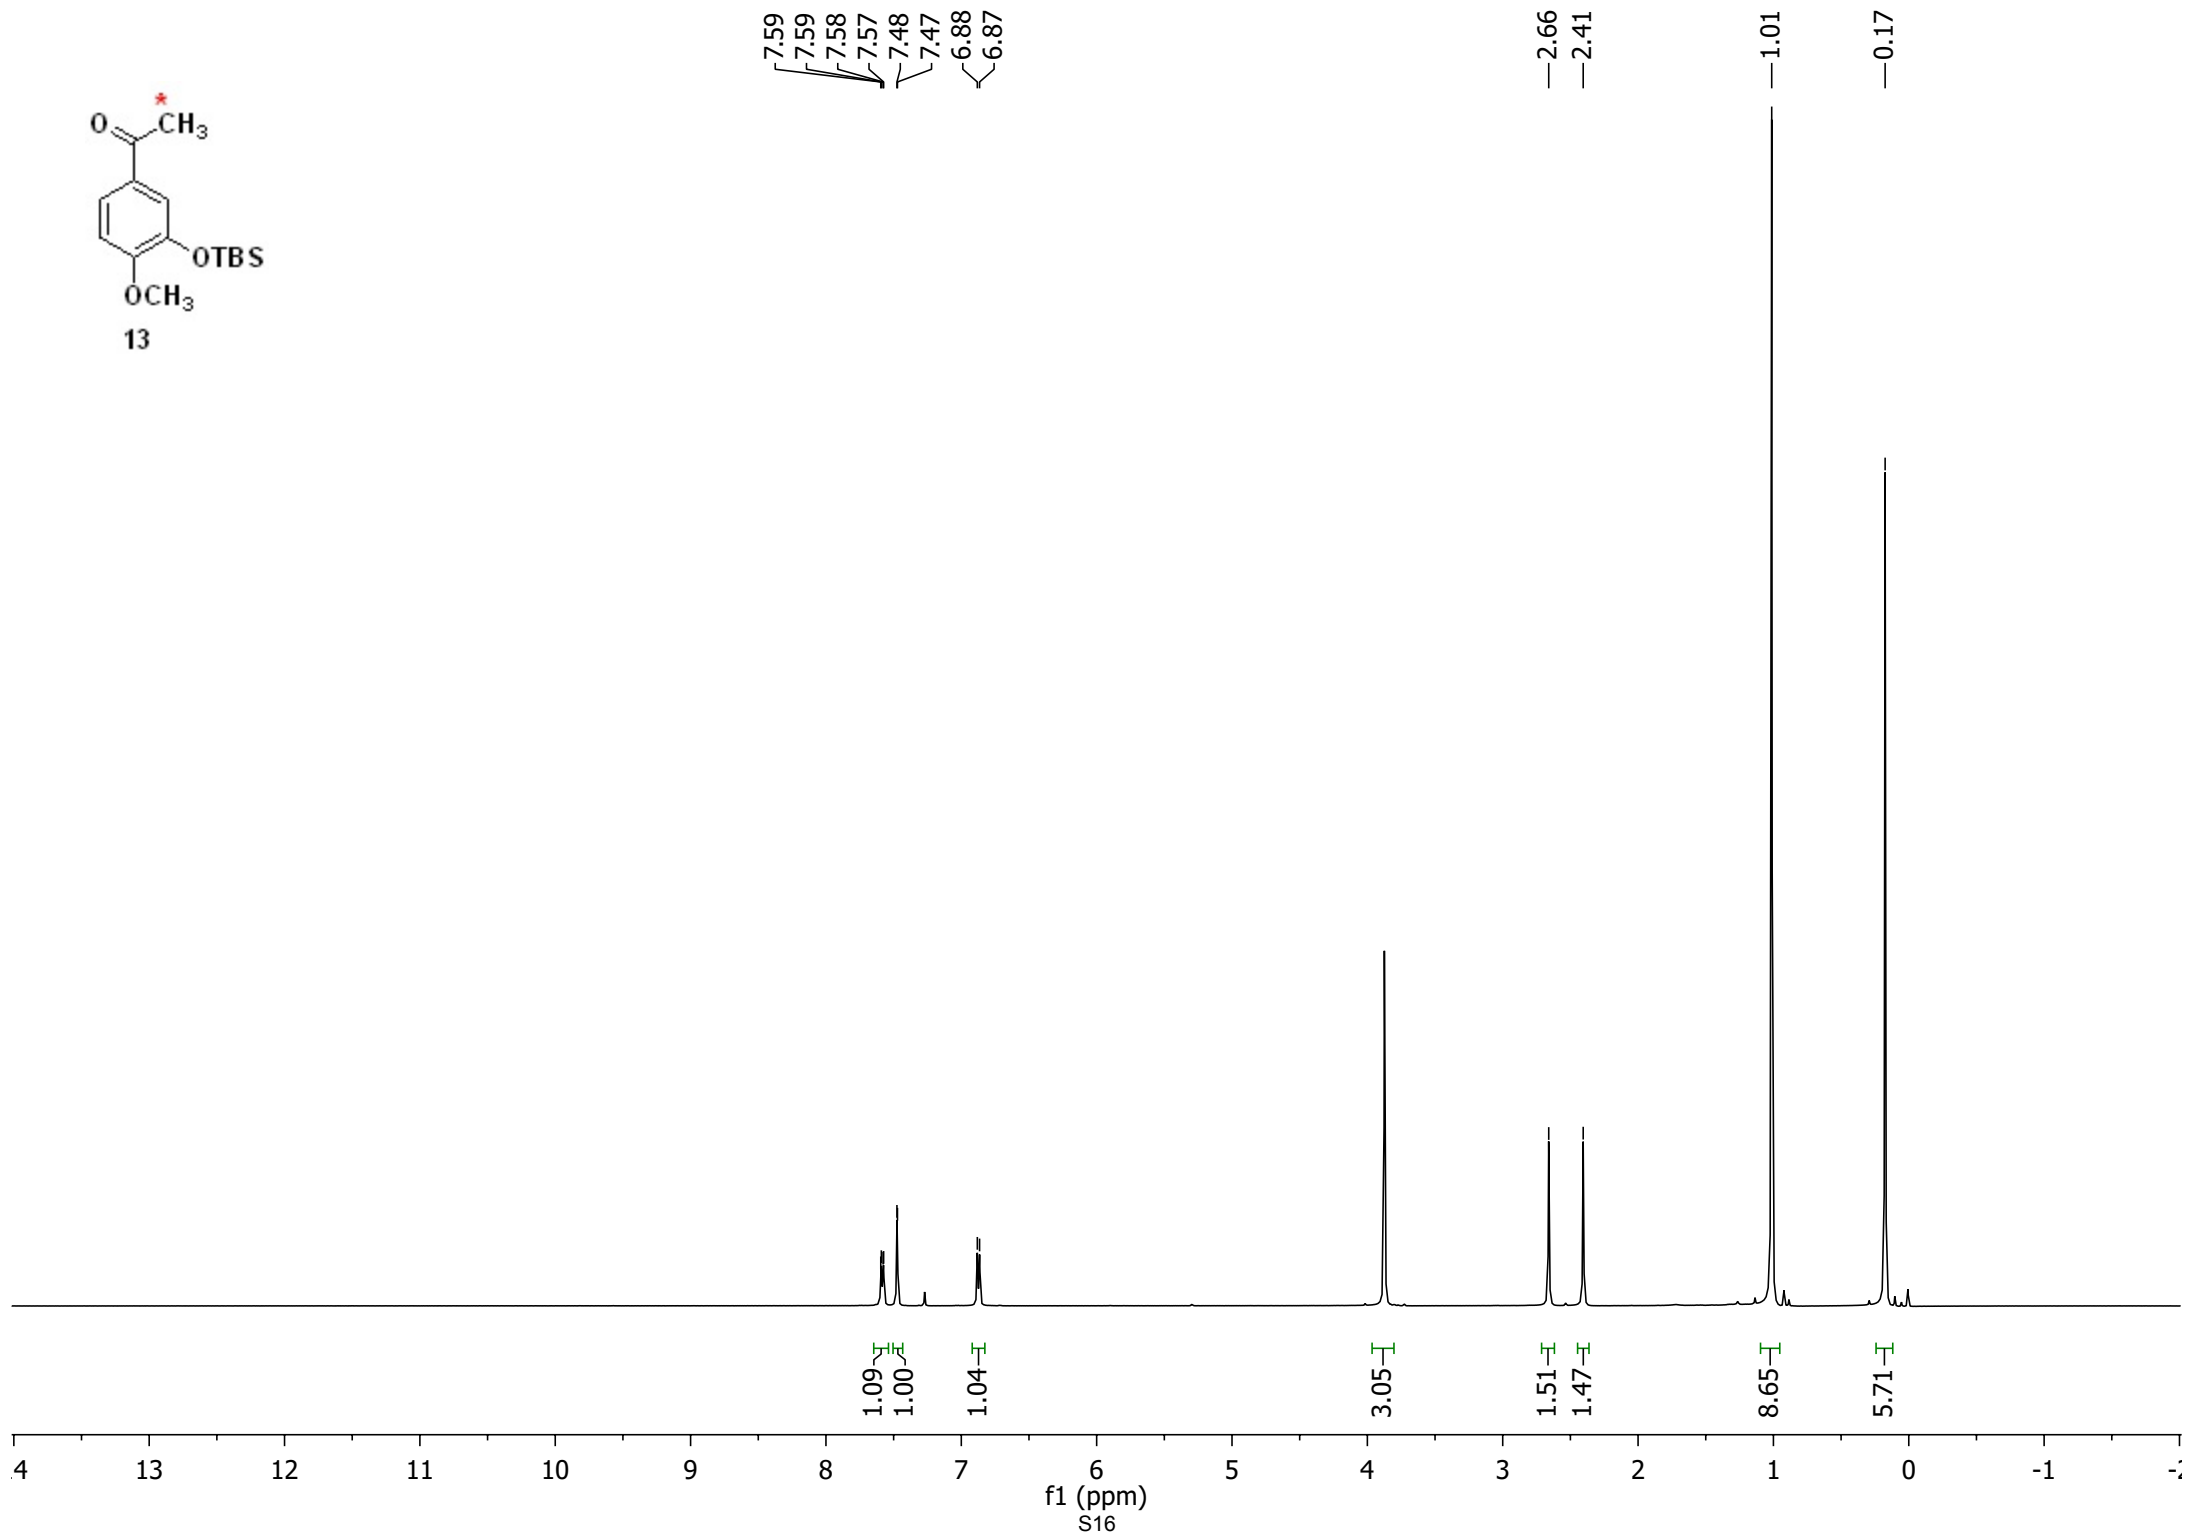



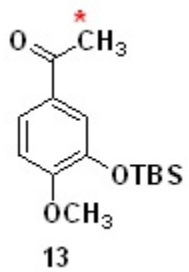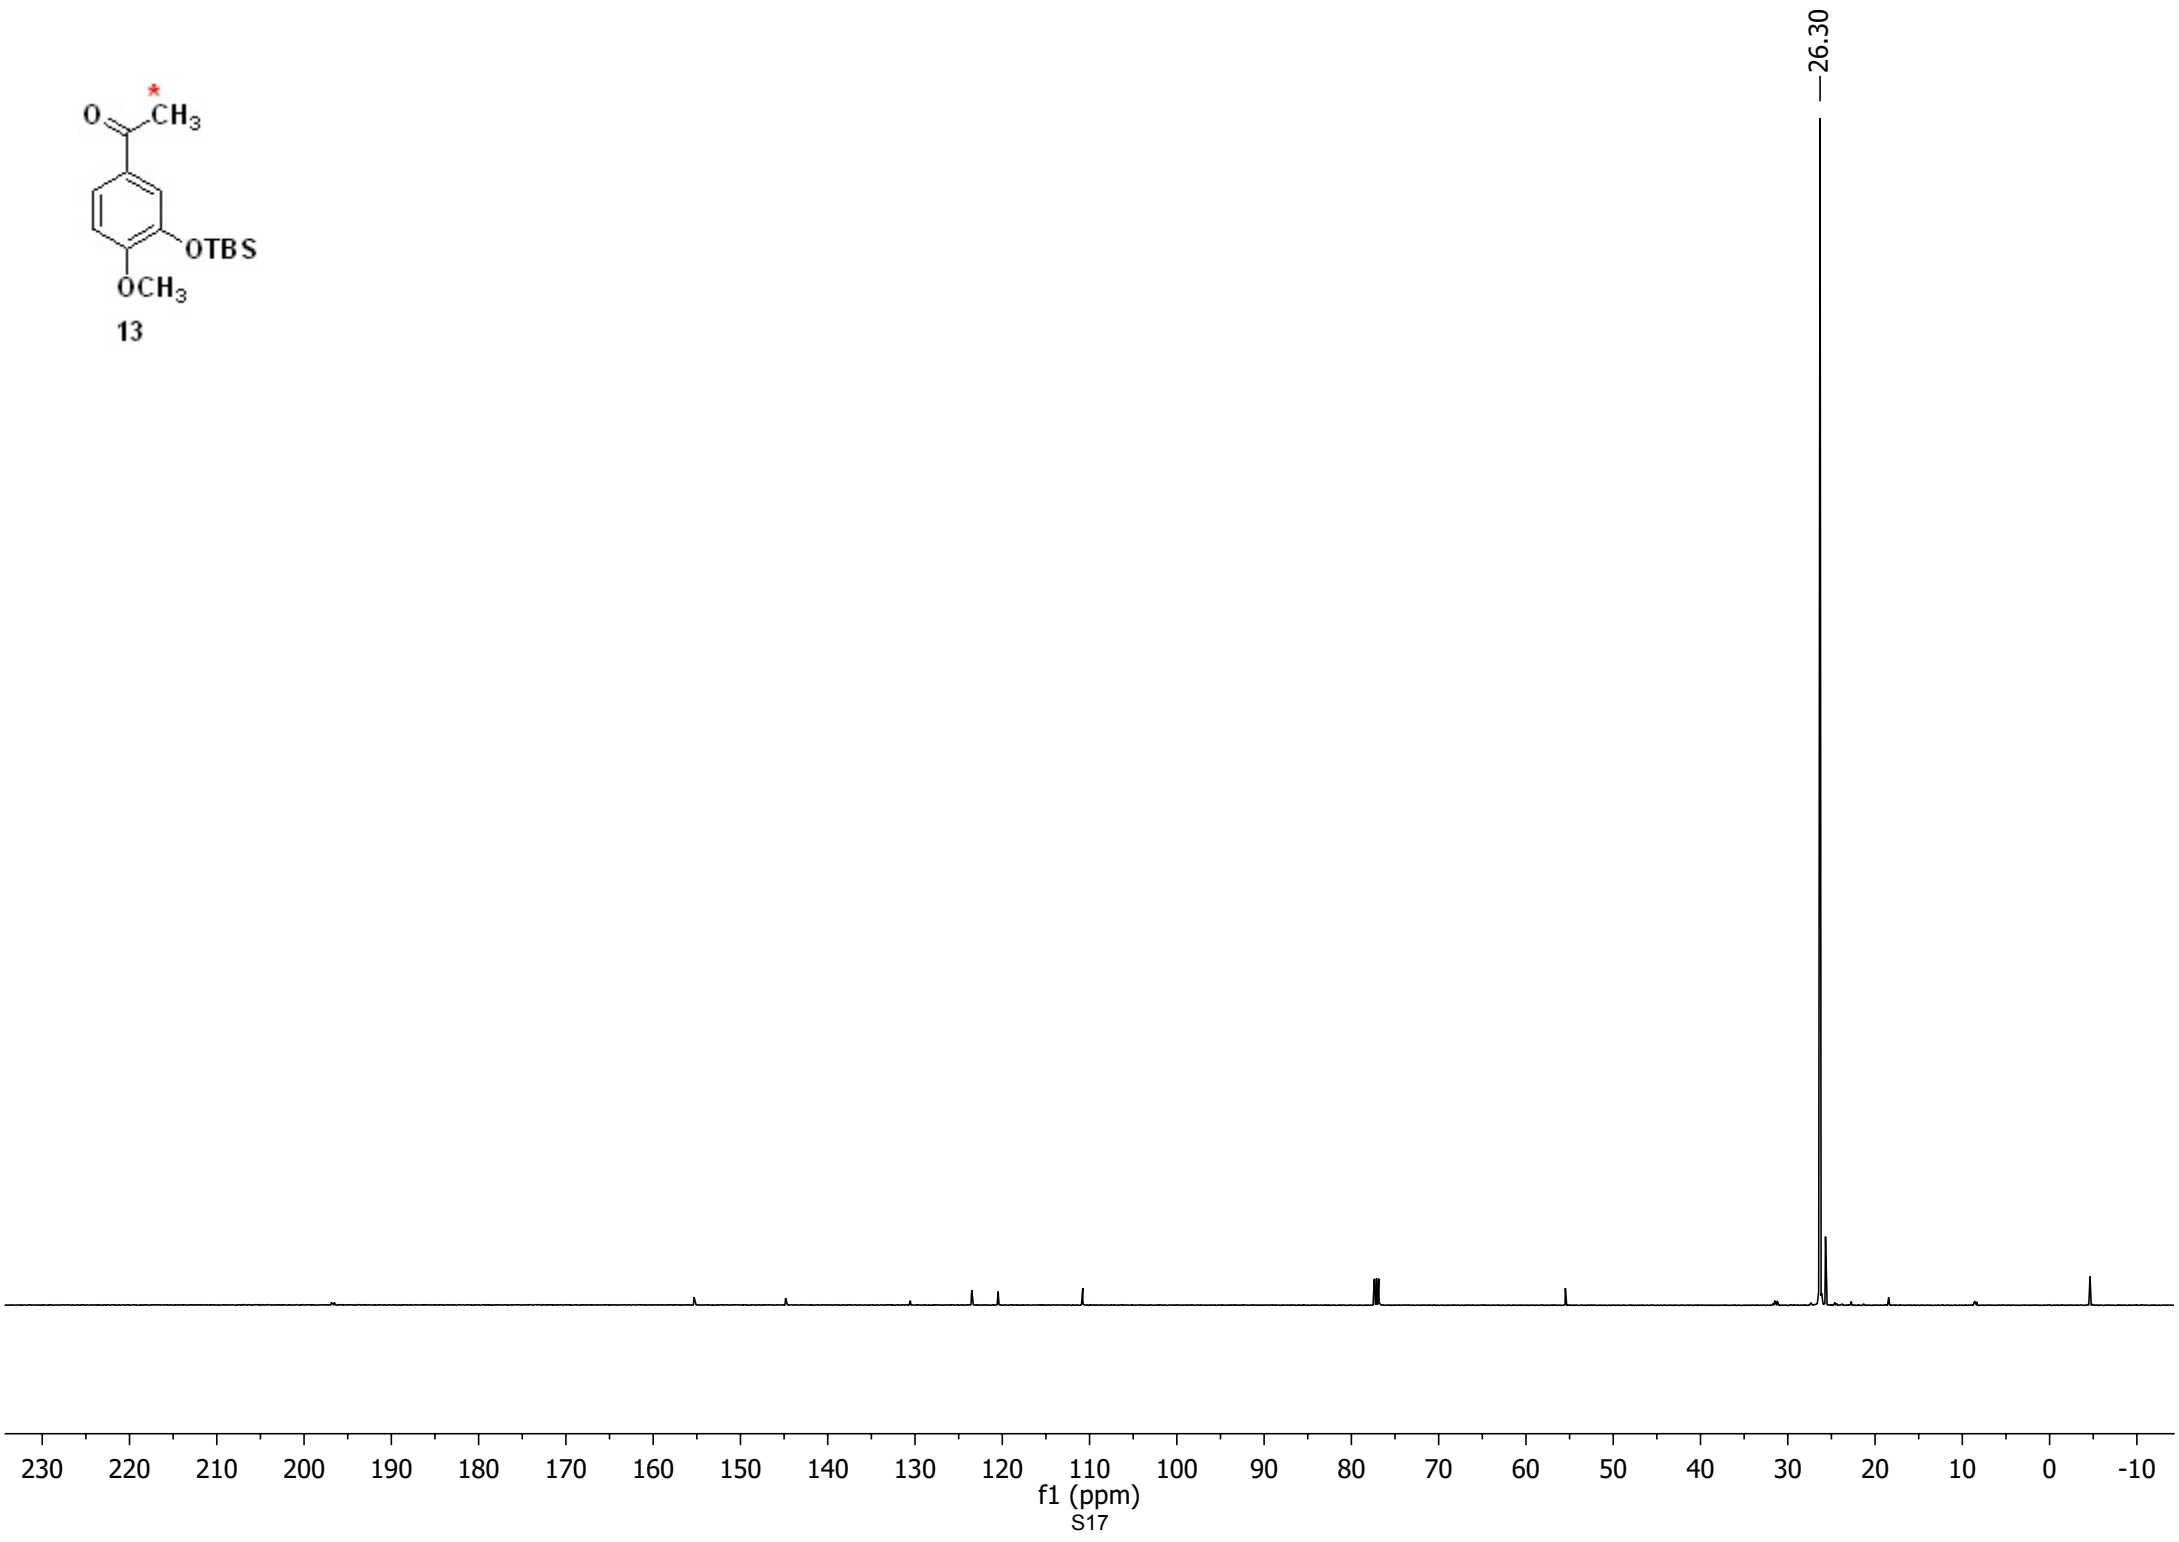

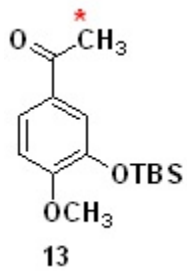

196.88  
196.54

155.31

144.83

130.65

130.54

123.50

120.47

110.78

77.37

77.12

76.86

55.48

26.30

25.68

18.44

-4.63

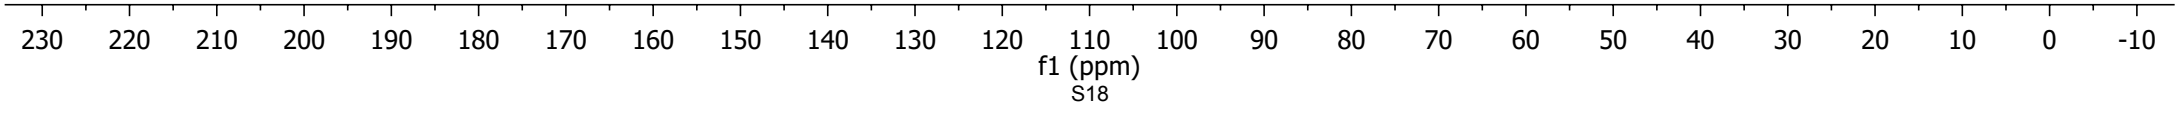

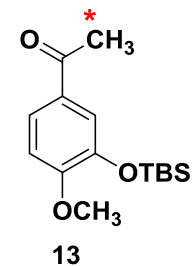

C:\Xcalibur\...MTM\_IV\_37\_Orbi\_+ESI

12/31/2014 1:13:46 AM

MTM\_IV\_37

MTM\_IV\_37\_Orbi\_+ESI #20 RT: 0.24 AV: 1 NL  
 T: FTMS + c ESI Full ms [100.00-1000.00]

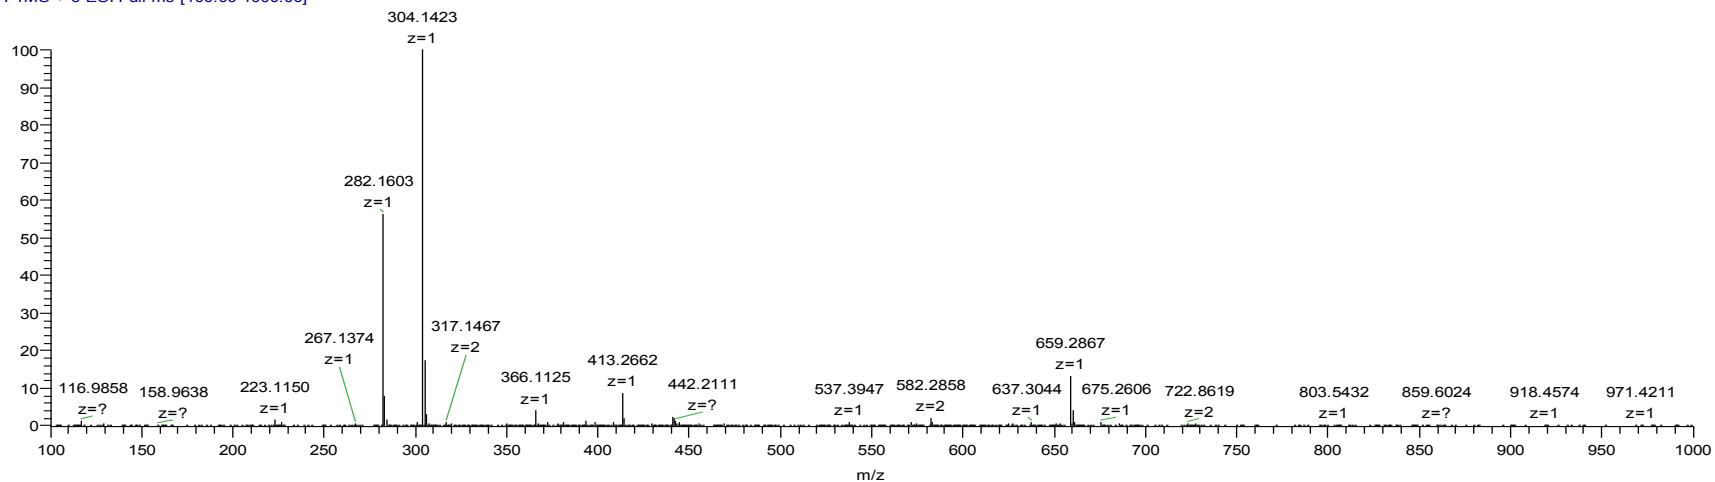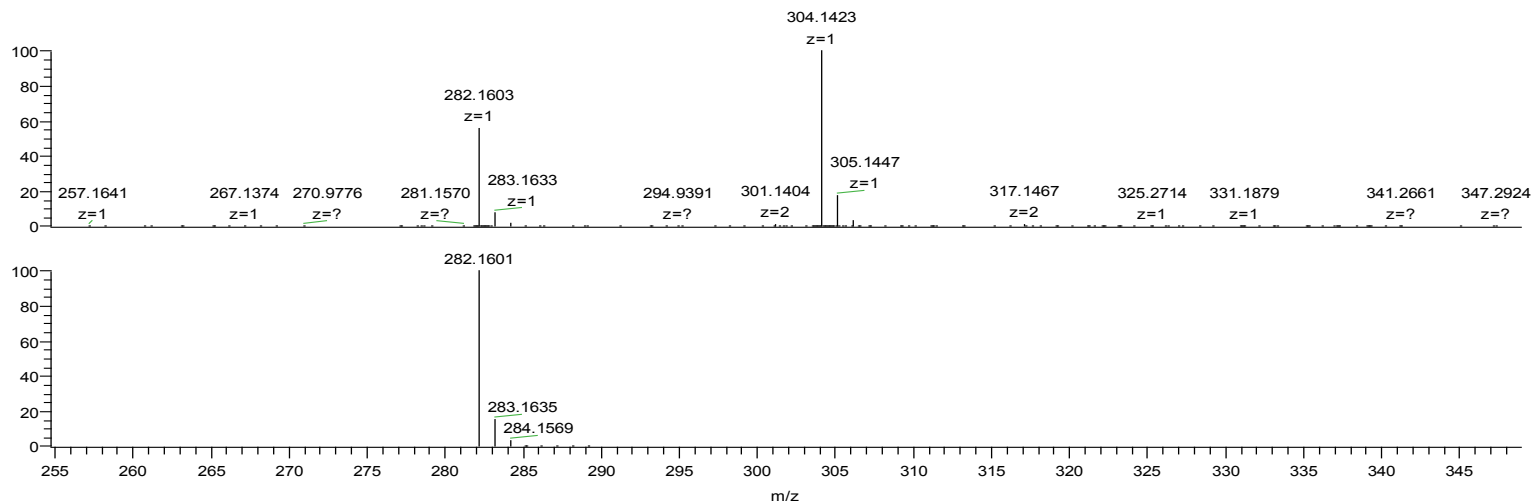

NL:  
 4.06E6  
 MTM\_IV\_37\_Orbi\_+  
 ESI#20 RT: 0.24  
 AV: 1 T: FTMS + c  
 ESI Full ms  
 [100.00-1000.00]

NL:  
 7.85E5  
 $C_{14}^{13}H_{25}O_3Si_1$   
 $C_{14}^{13}H_{25}O_3Si_1$   
 pa Chrg 1

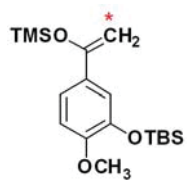

14

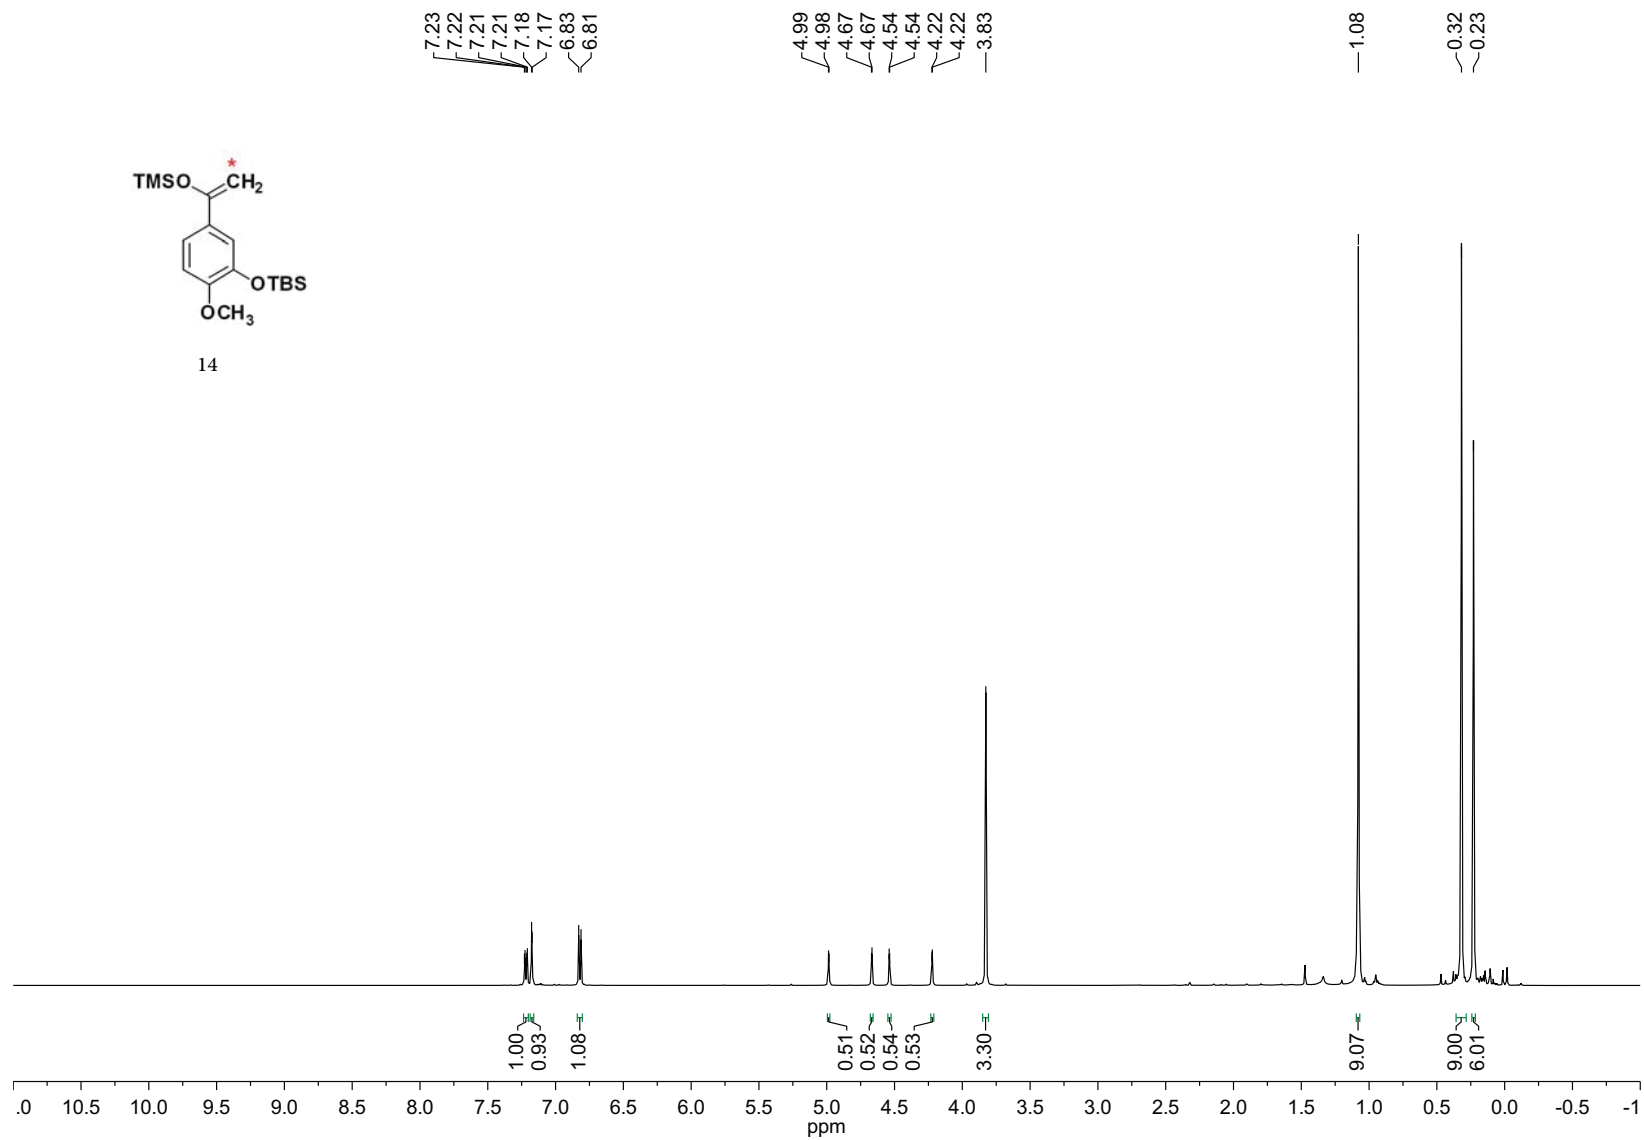

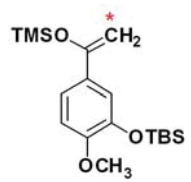

14

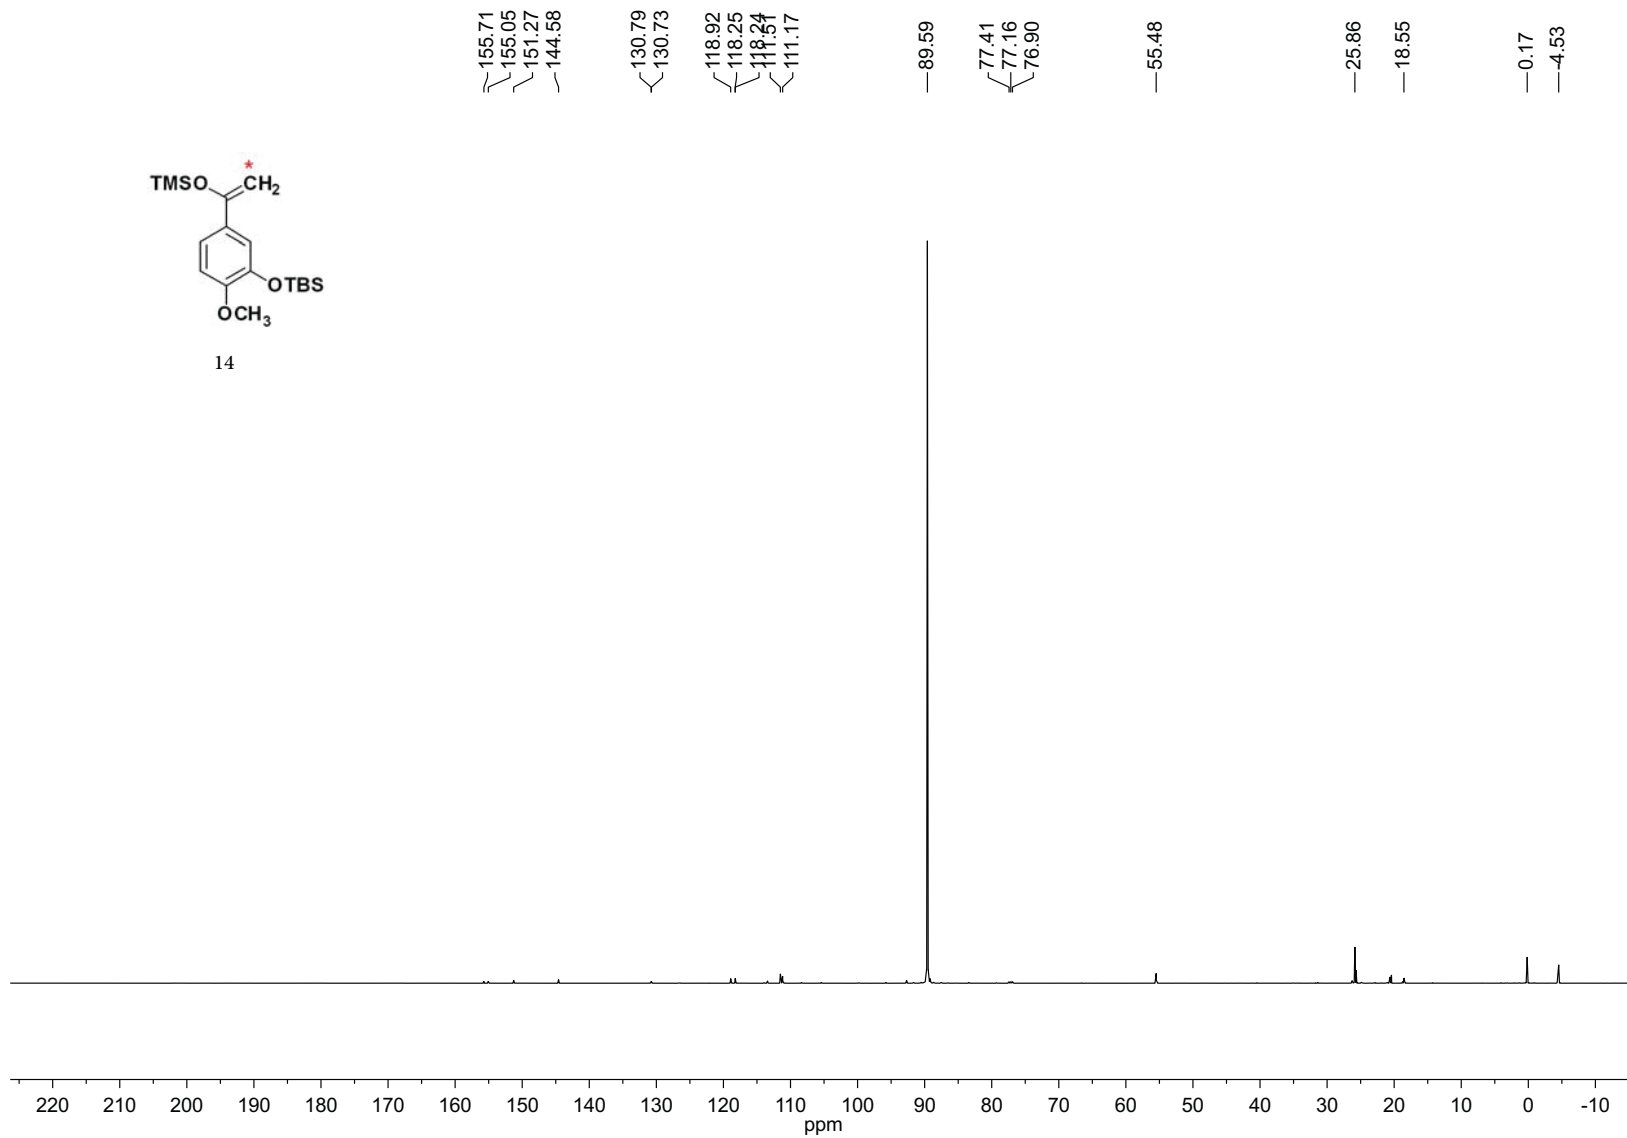



14

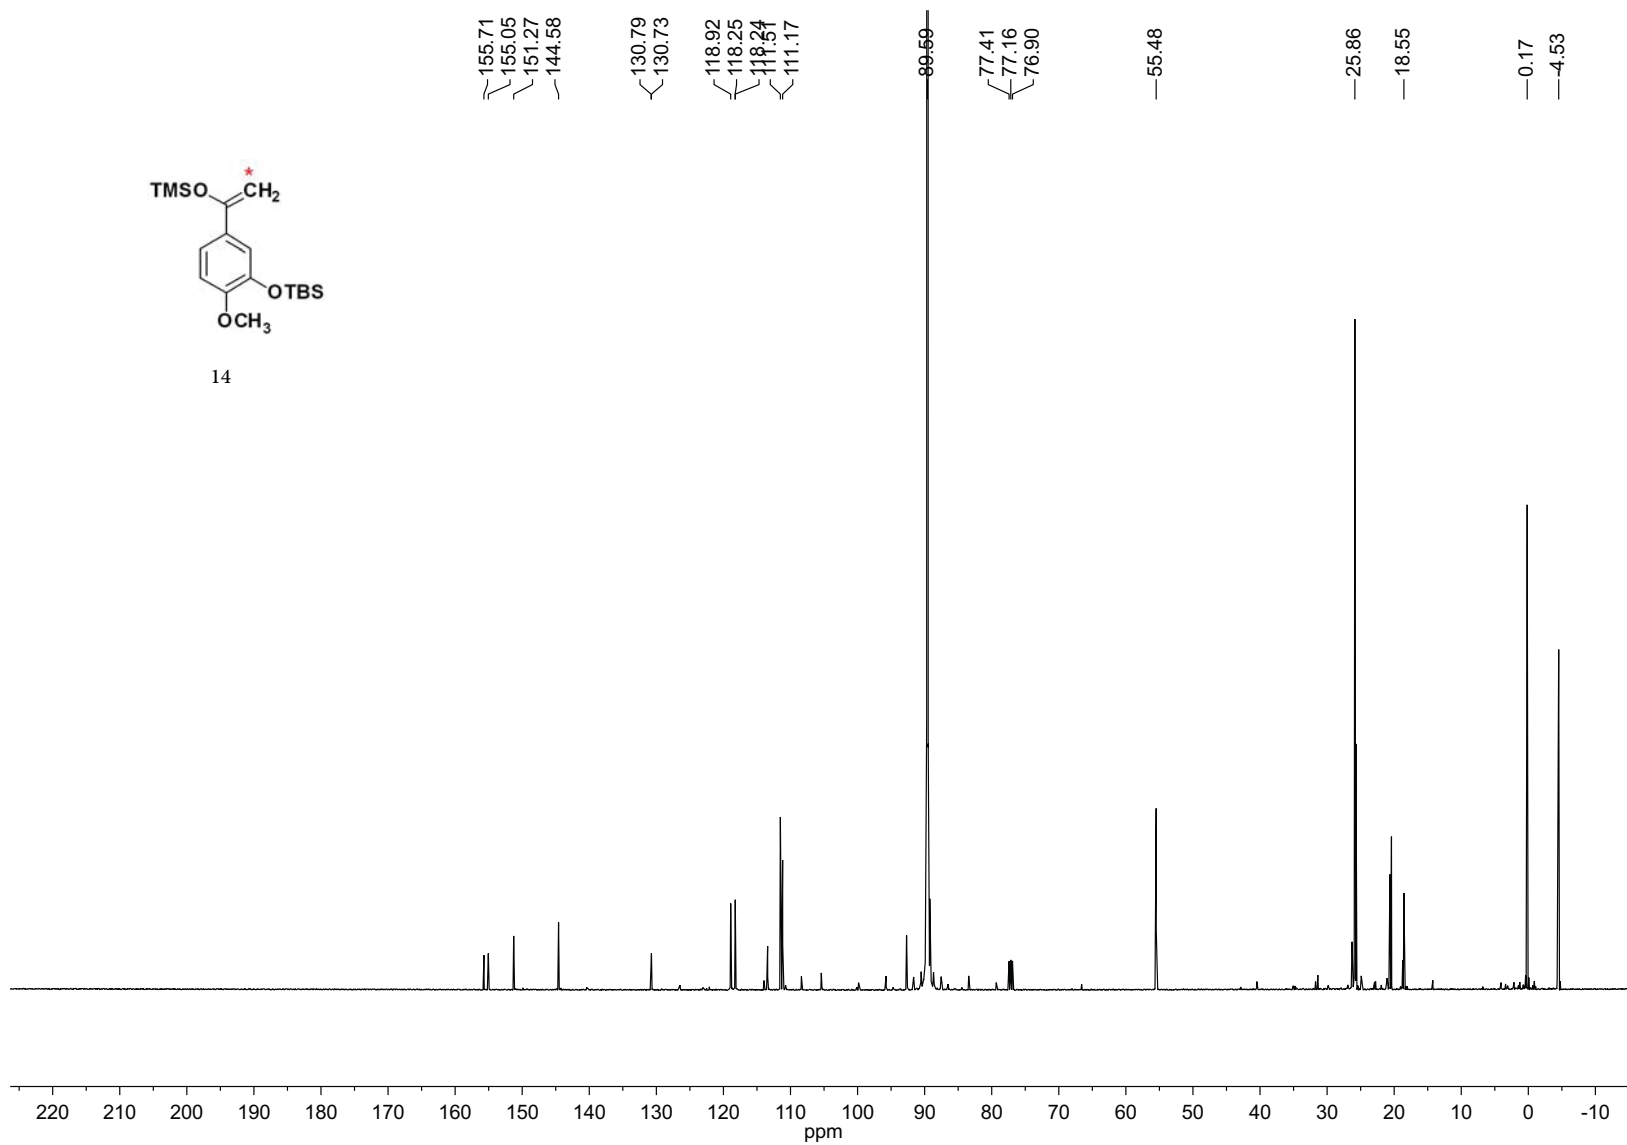

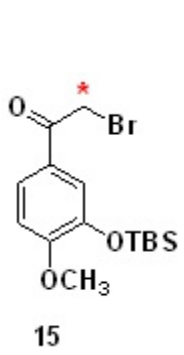

7.63  
7.63  
7.61  
7.61  
7.49  
7.49  
6.90  
6.88

4.53  
4.22  
3.89

1.01  
0.18

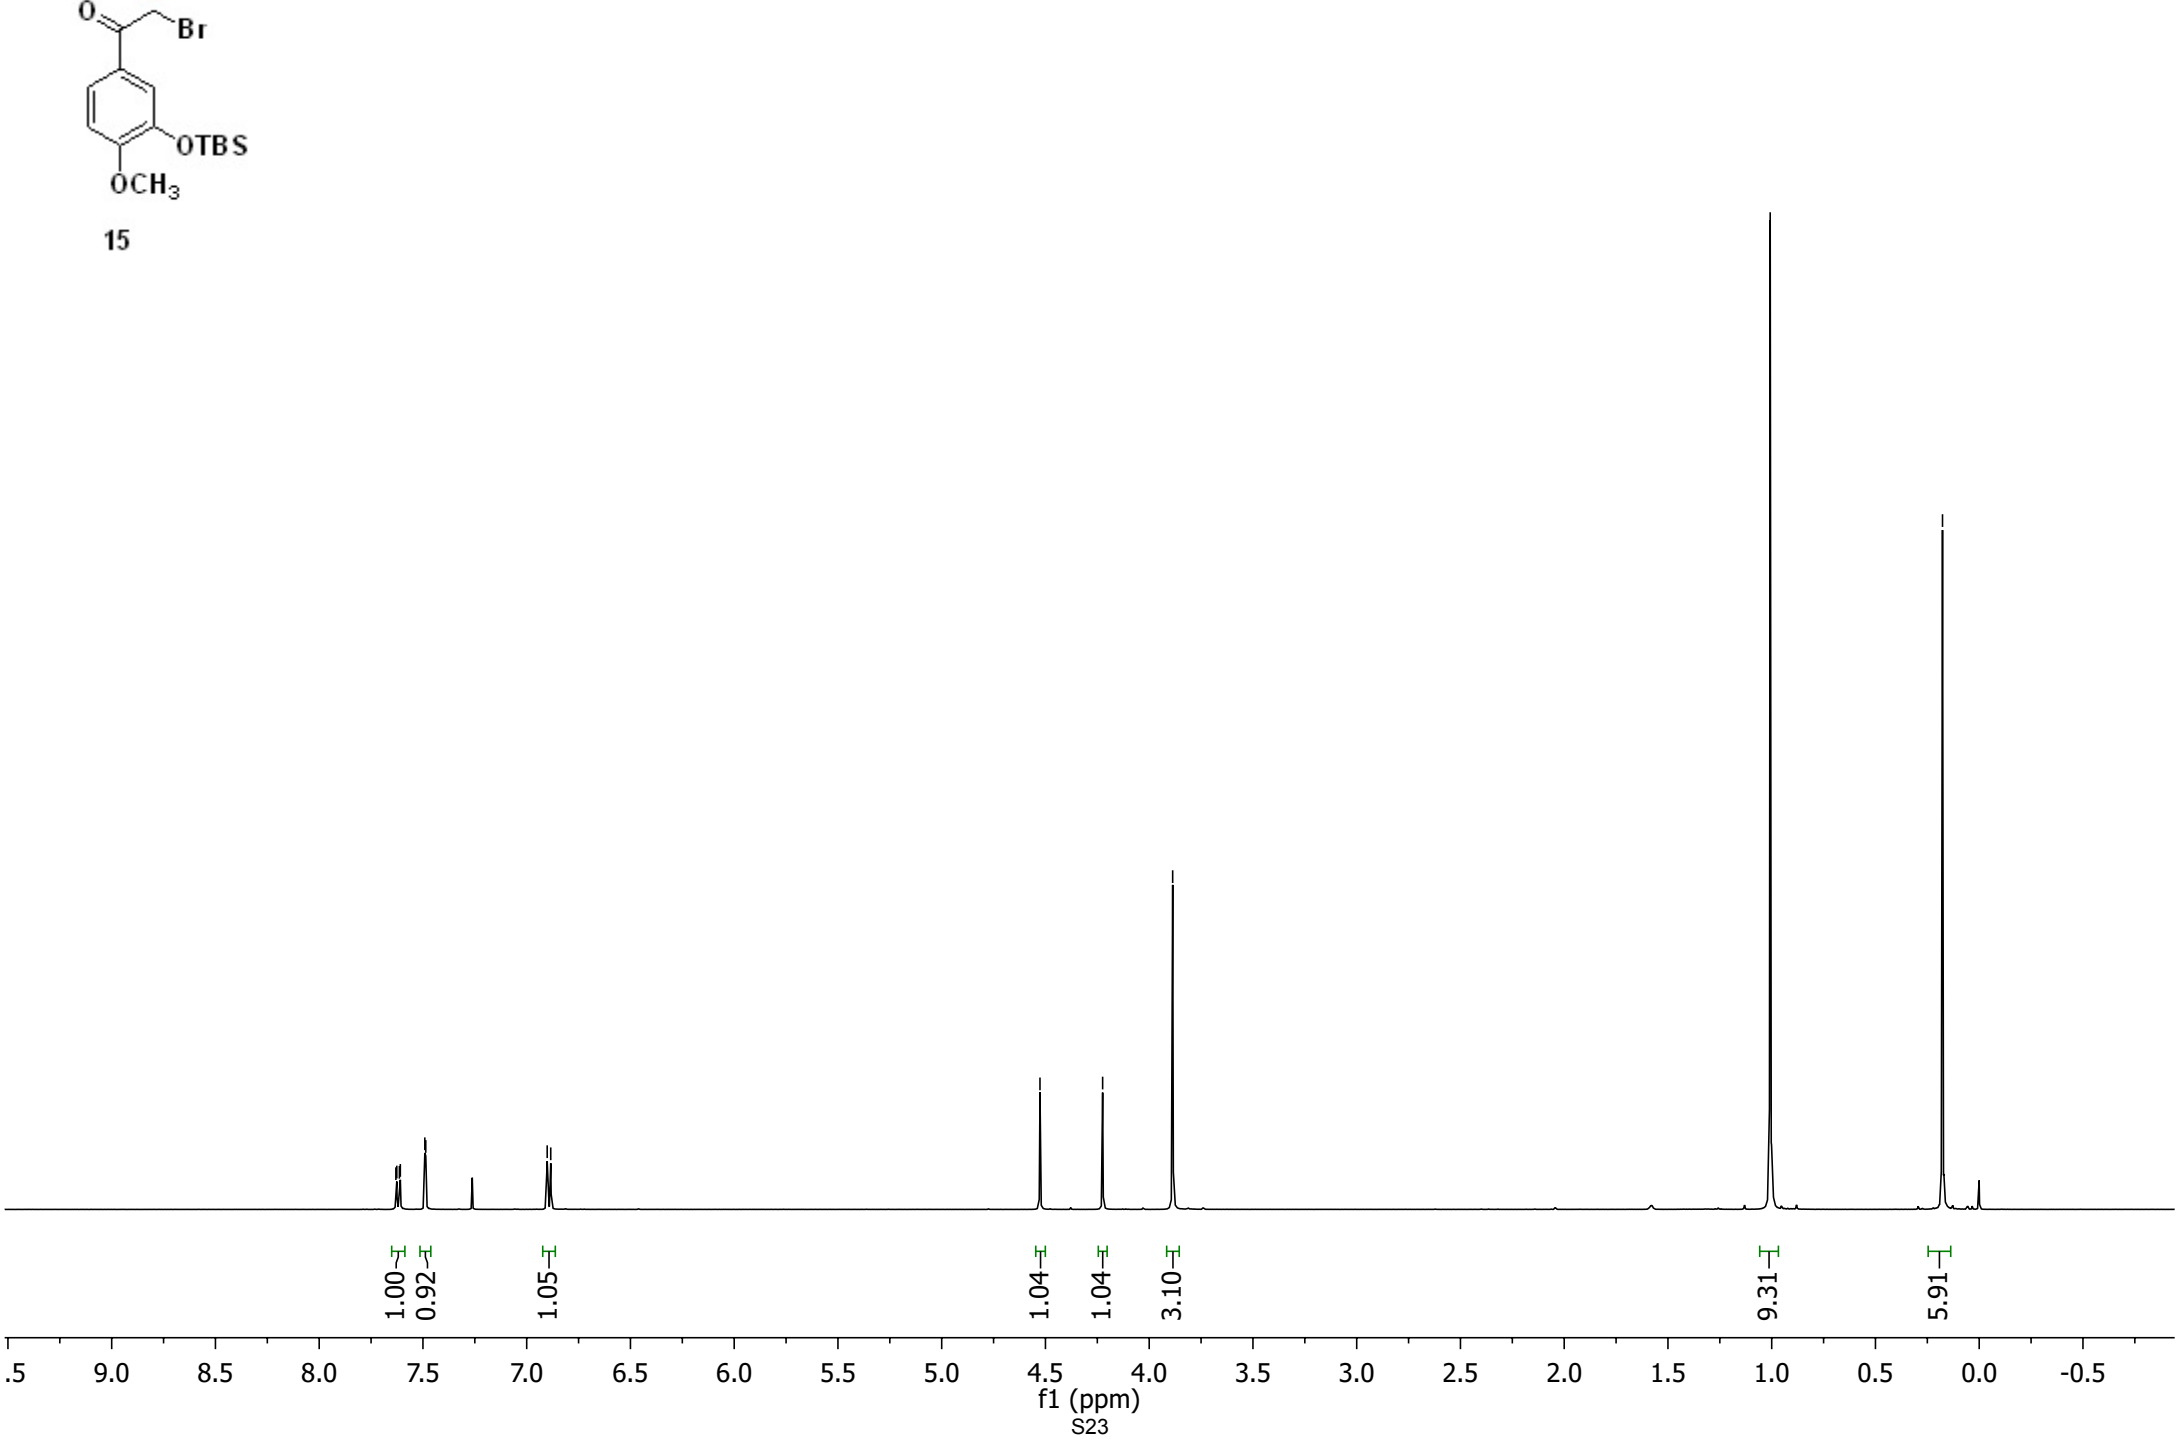

1.00  
0.92

1.05

1.04

1.04

3.10

9.31

5.91

f1 (ppm)  
S23

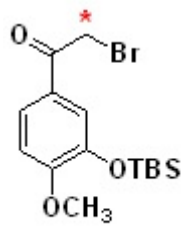

15

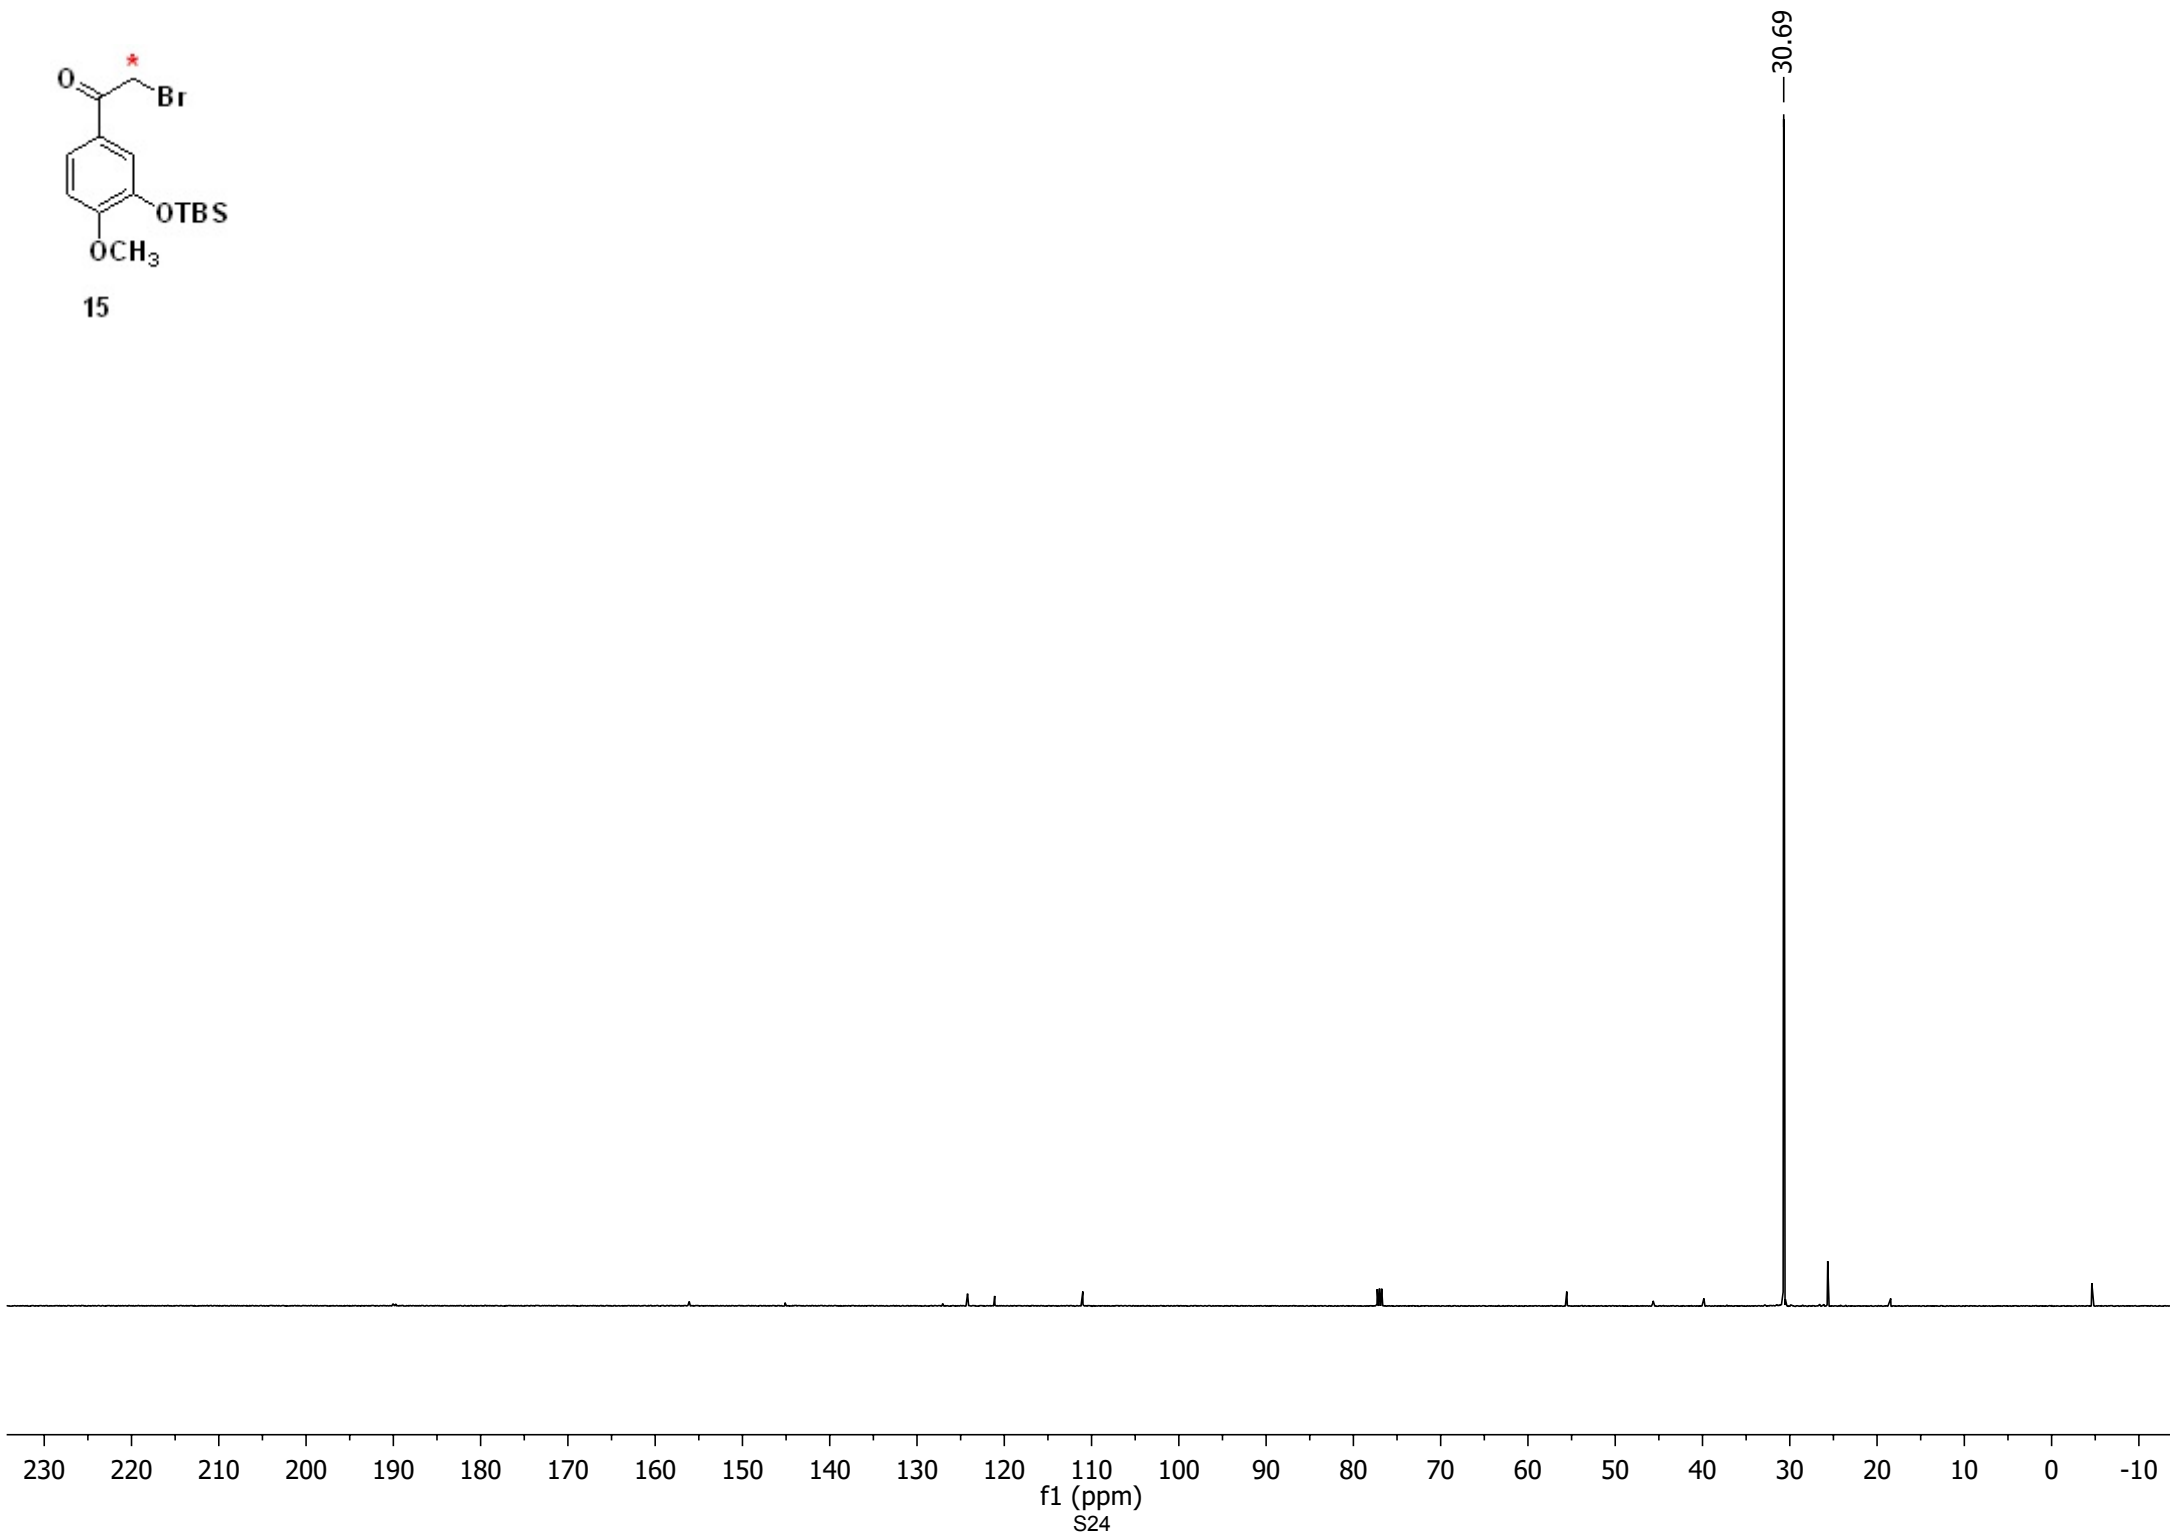





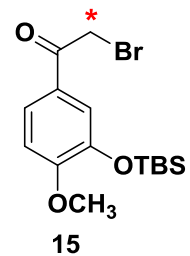

C:\Xcalibur\...MTM\_IV\_41\_130821155352

8/21/2013 3:53:52 PM

MTM\_IV\_41

MTM\_IV\_41\_130821155352 #50 RT: 0.38 AV: 1  
T: FTMS + p ESI Full ms [150.00-450.00]

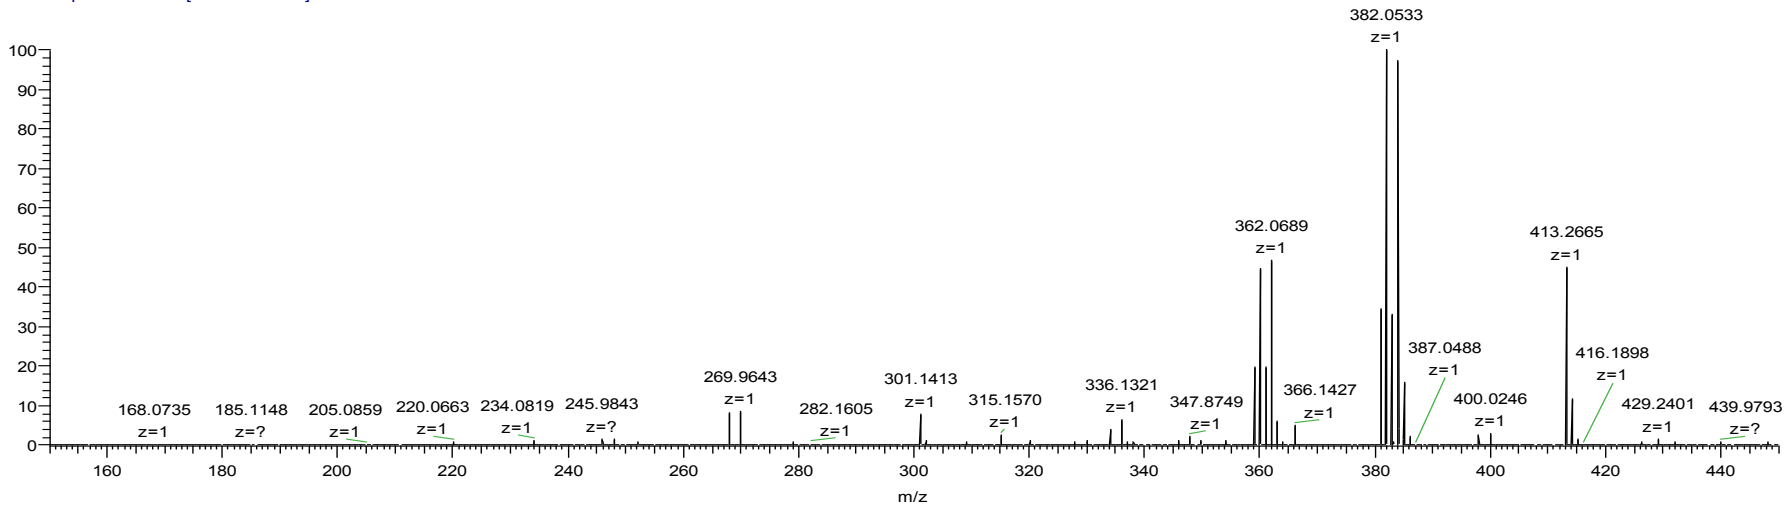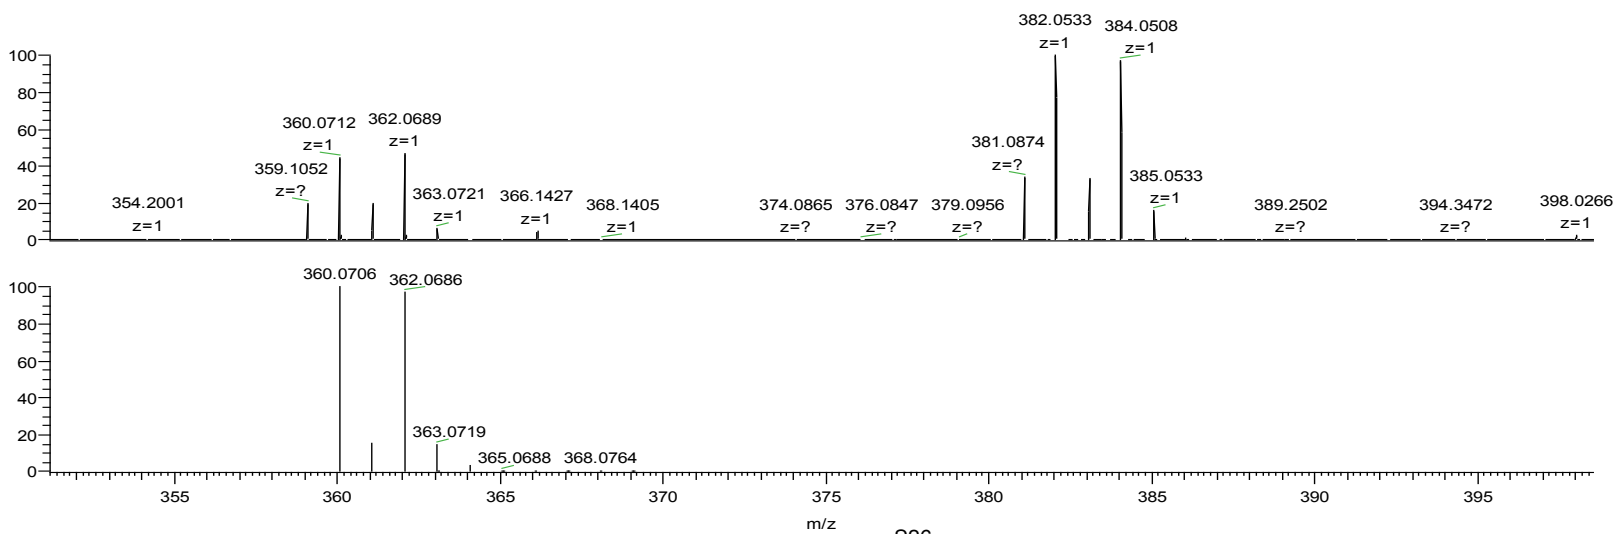

NL:  
2.99E8  
MTM\_IV\_41\_13082115  
5352#50 RT: 0.38  
AV: 1 T: FTMS + p  
ESI Full ms  
[150.00-450.00]

NL:  
3.98E5  
C<sub>14</sub><sup>13</sup>CH<sub>24</sub> BrO<sub>3</sub> Si:  
C<sub>14</sub><sup>13</sup>C<sub>1</sub>H<sub>24</sub> Br<sub>1</sub>O<sub>3</sub> Si<sub>1</sub>  
pa Chrg 1

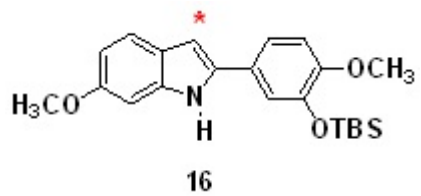

8.14  
 7.49  
 7.49  
 7.48  
 7.47  
 7.27  
 7.17  
 7.17  
 7.16  
 7.15  
 7.15  
 7.14  
 6.91  
 6.90  
 6.89  
 6.81  
 6.81  
 6.80  
 6.80  
 6.79  
 6.46  
 6.45

3.87  
 3.85

1.06

0.22

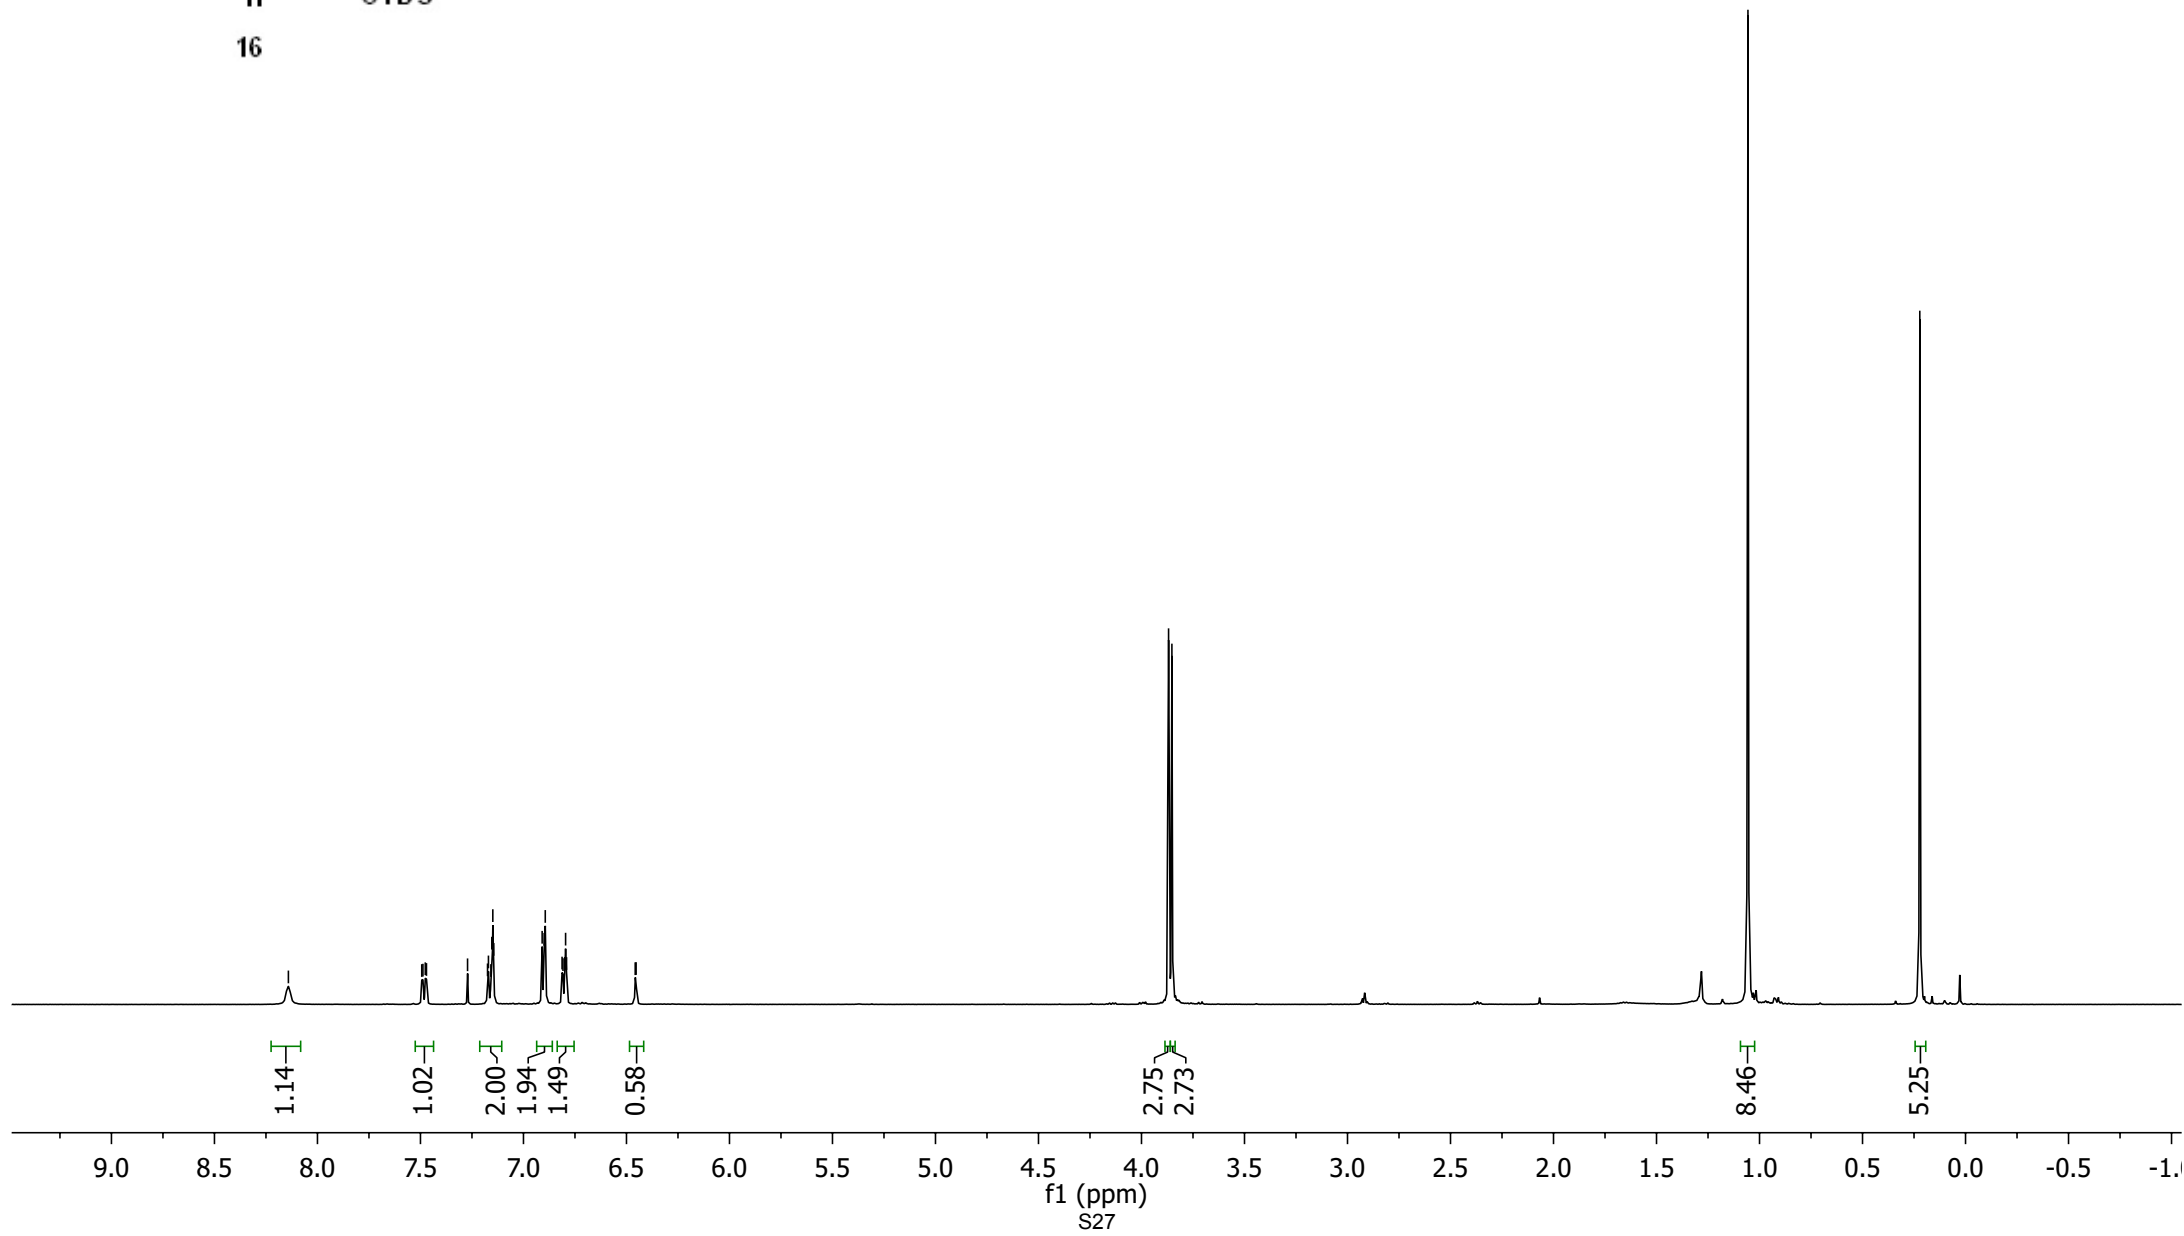

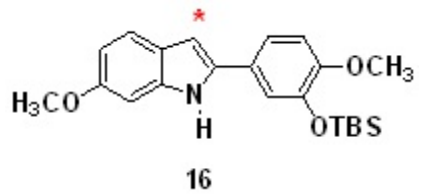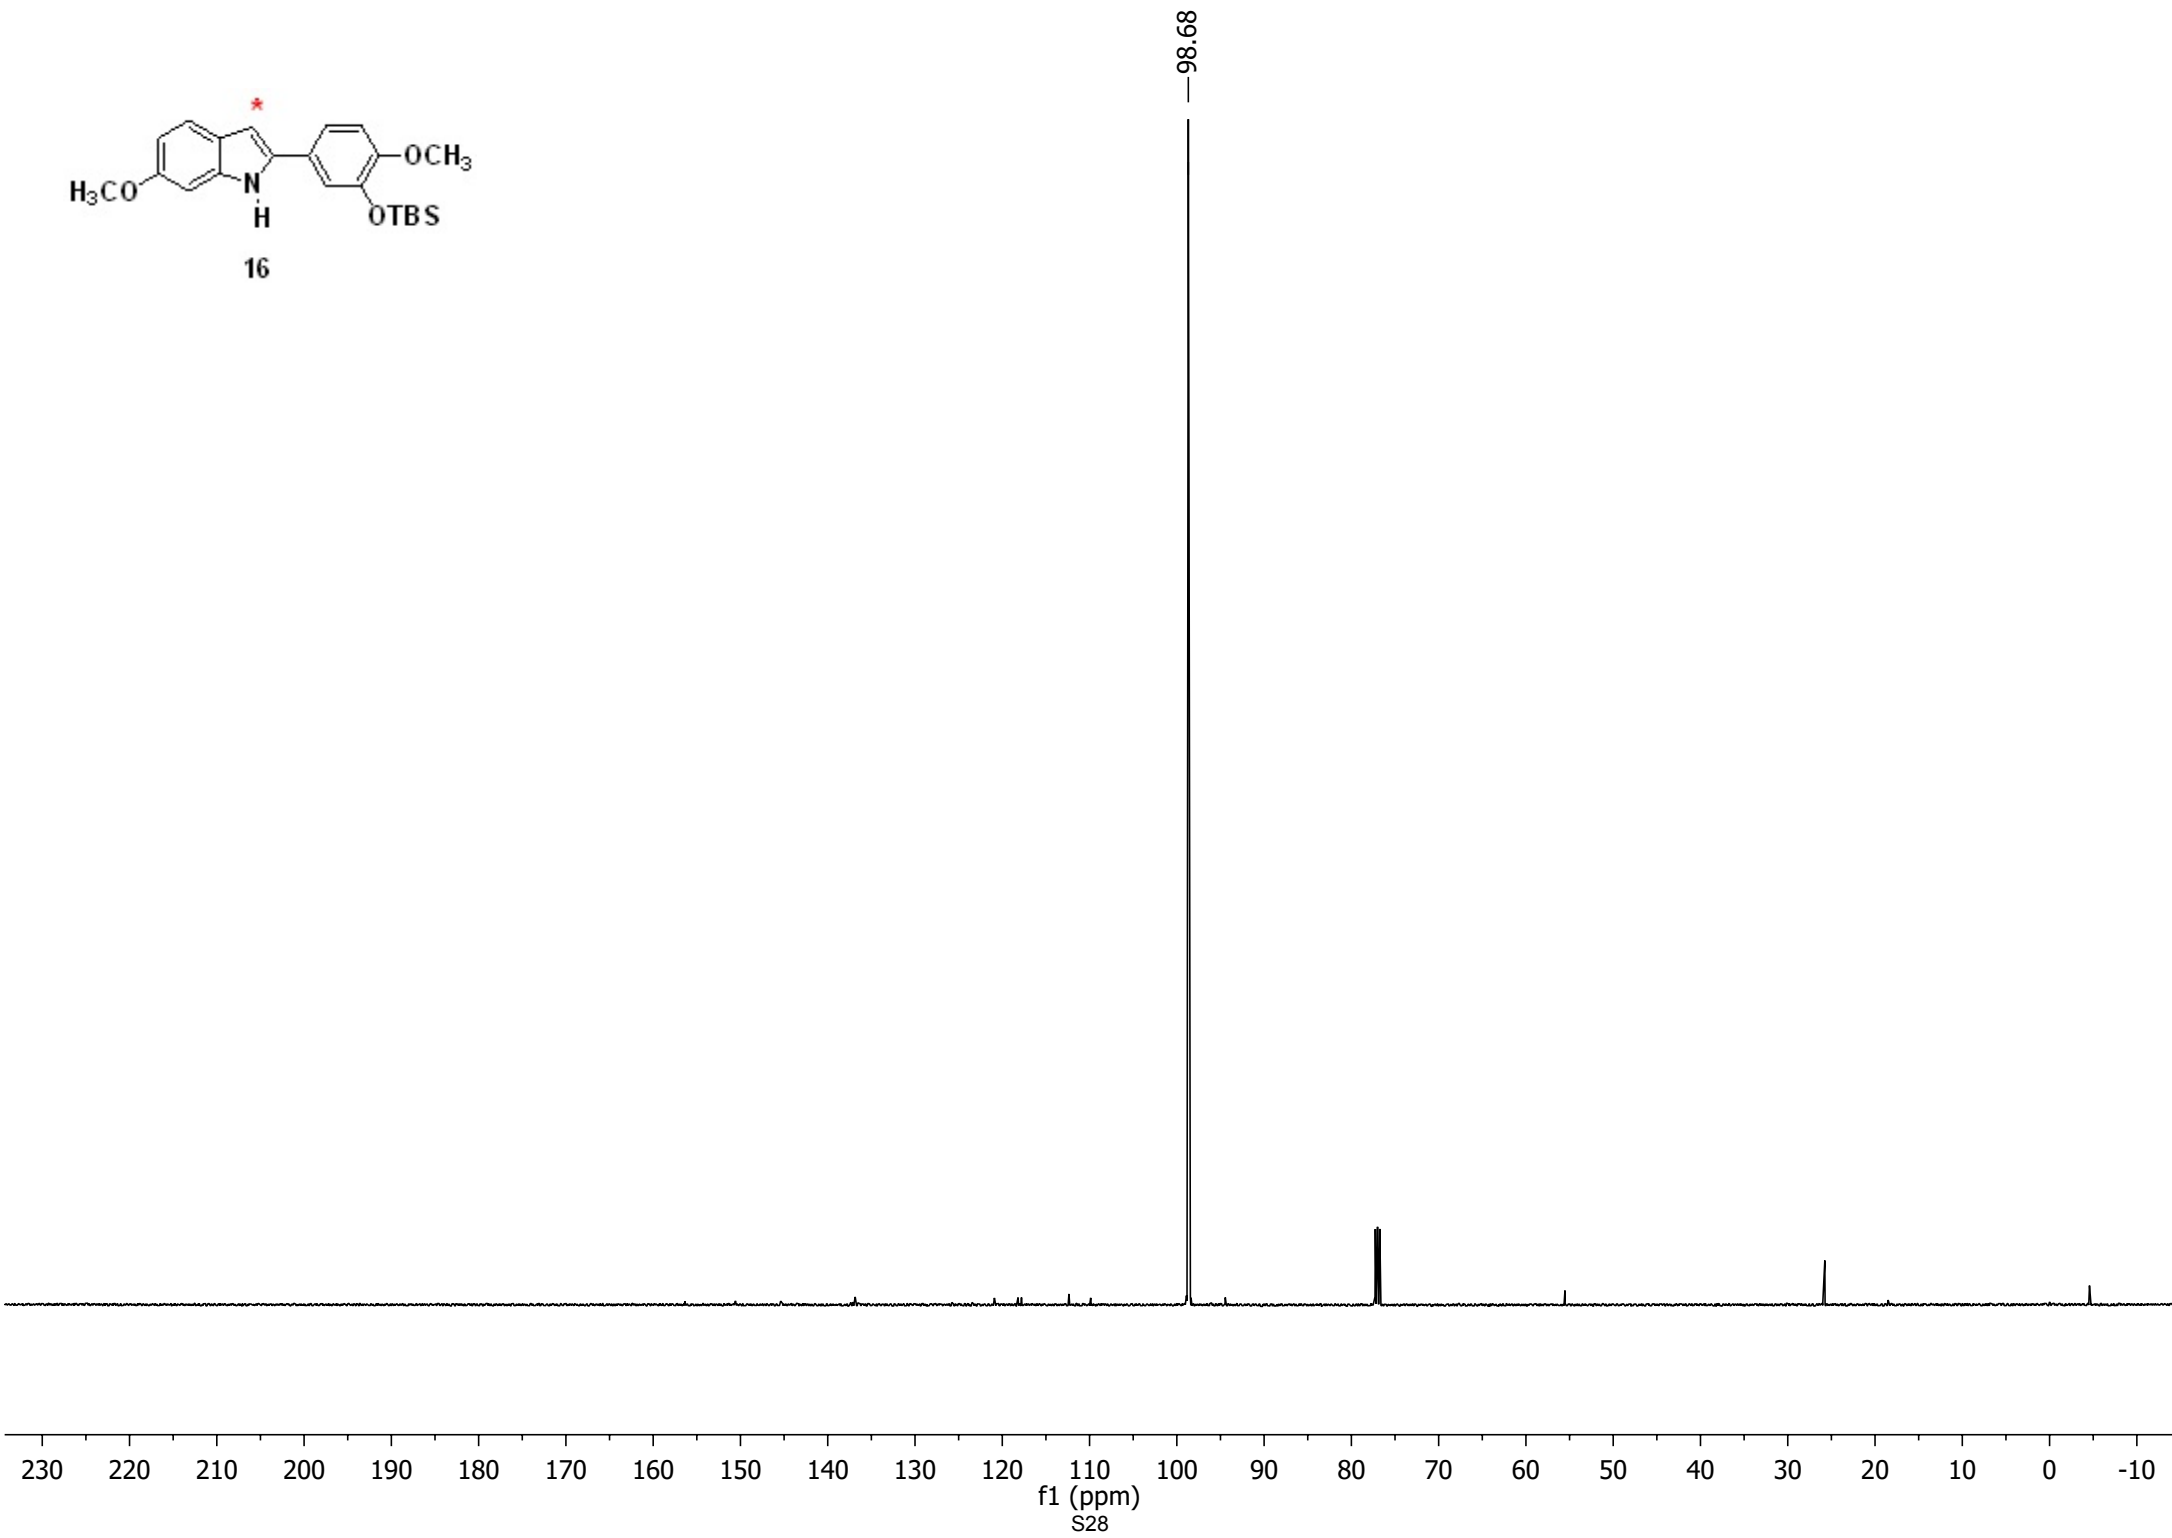

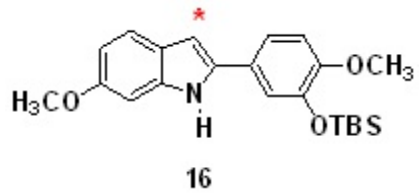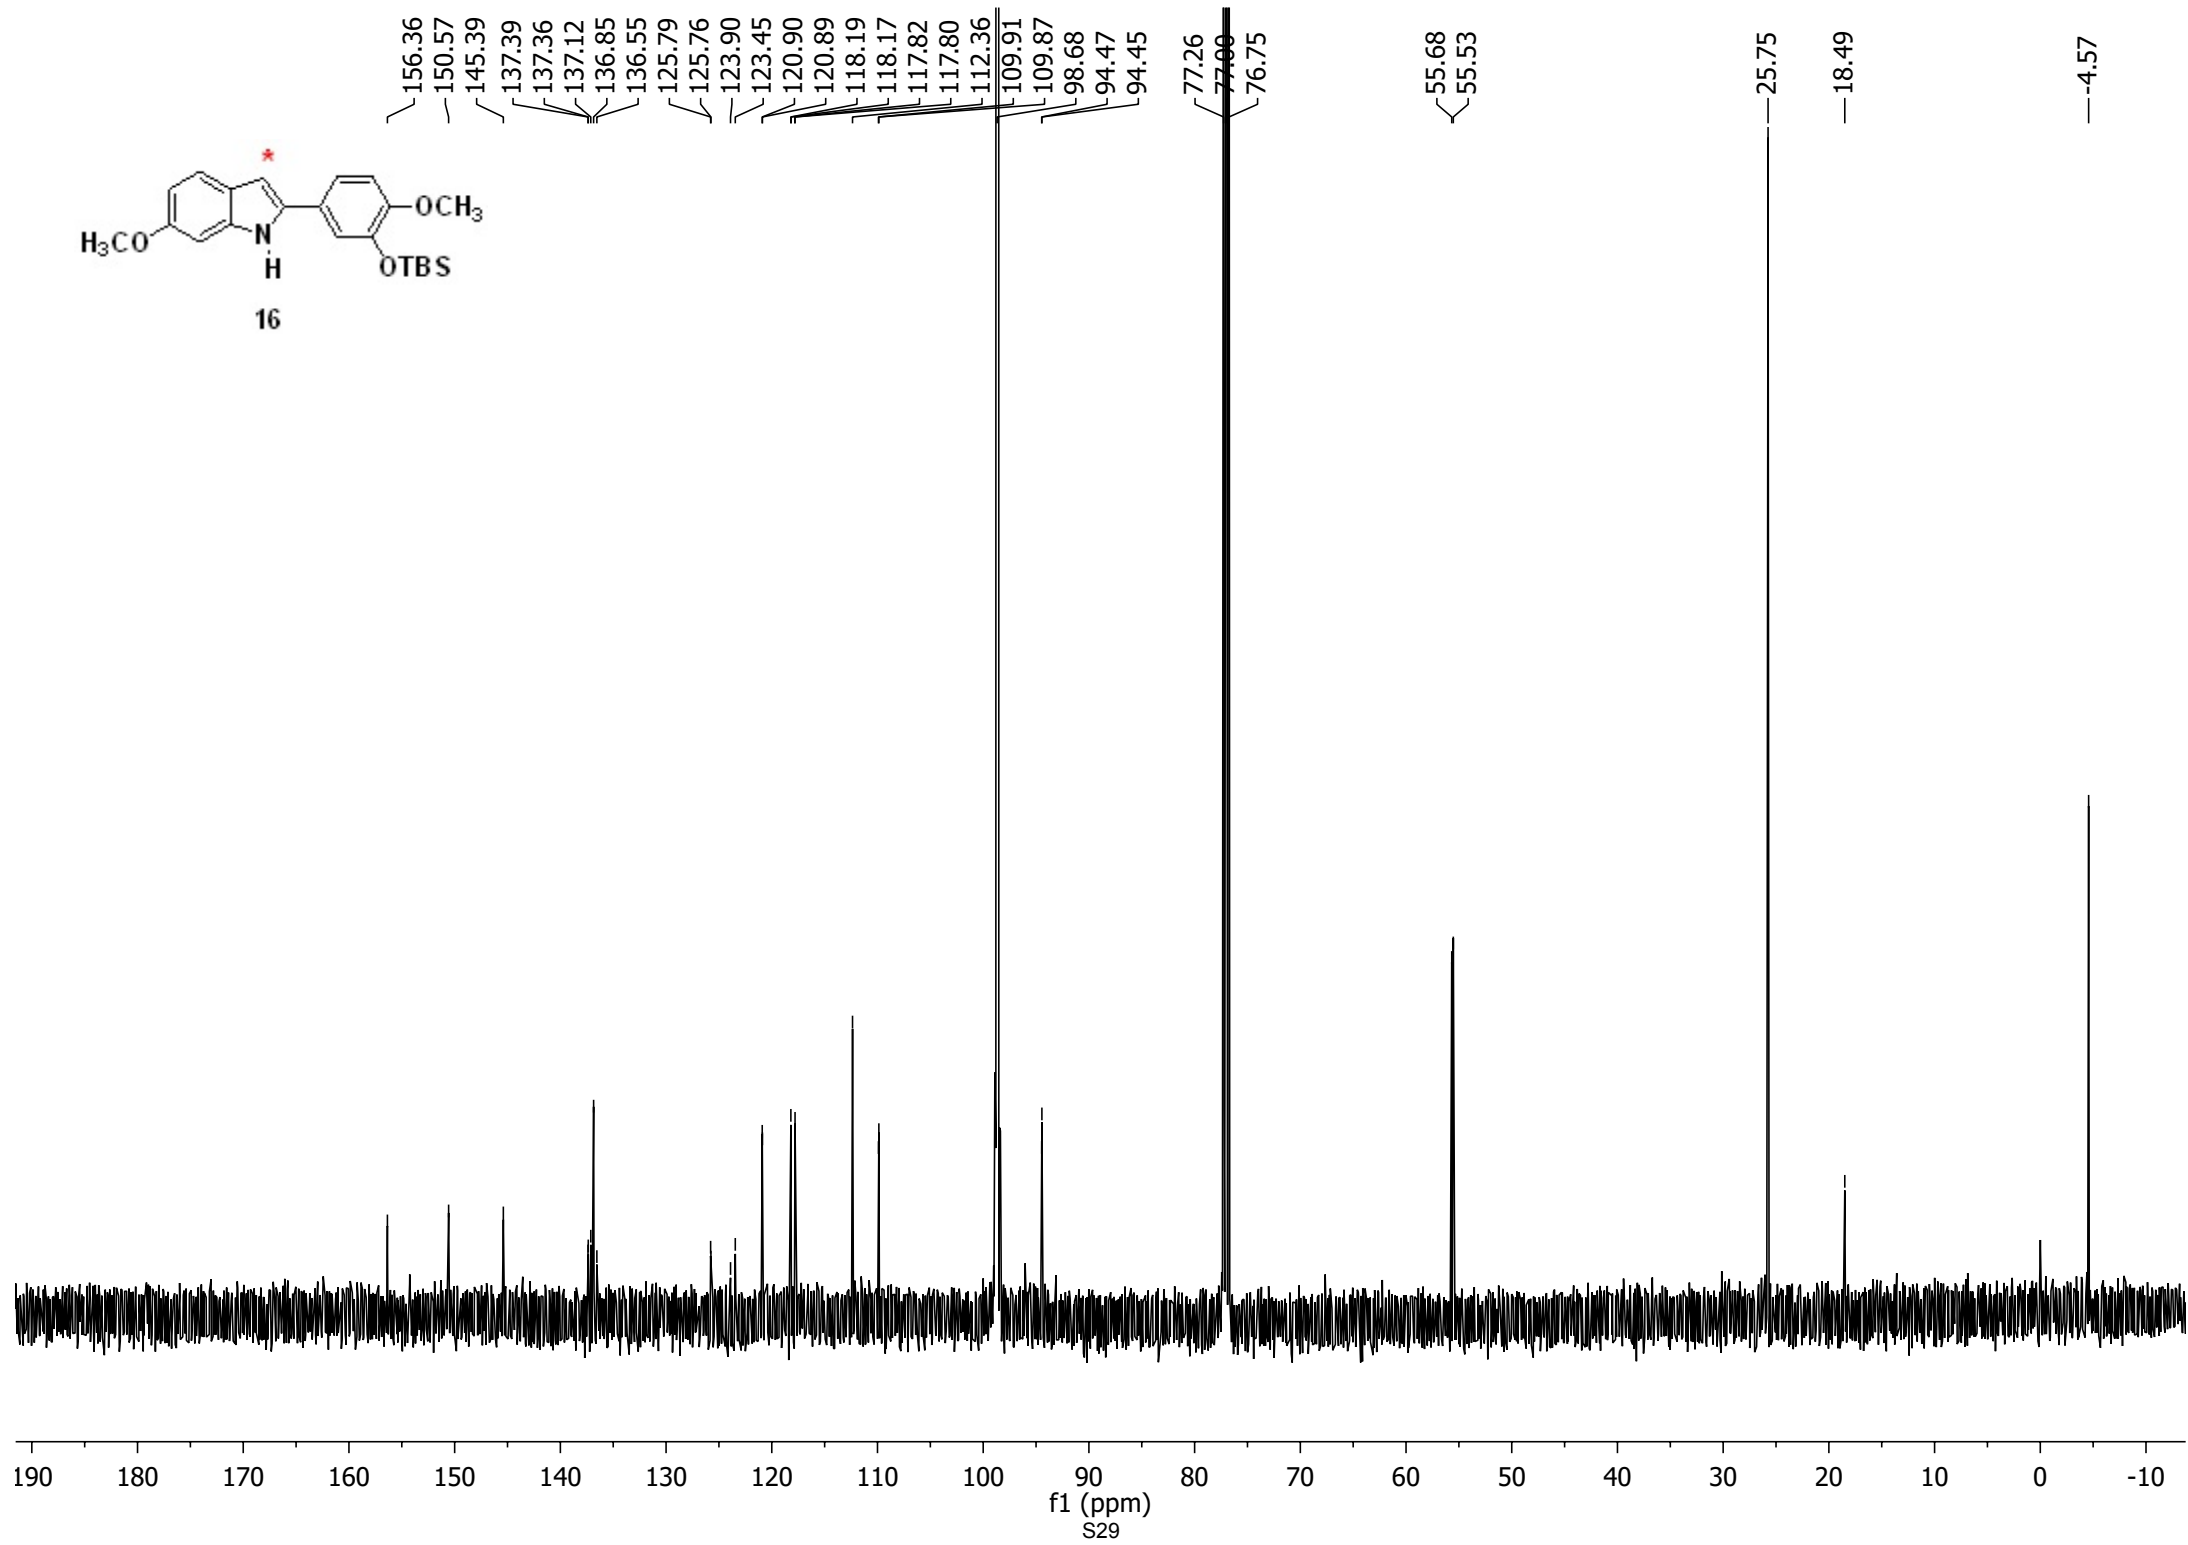

Sample Name: C13indole

=====  
Acq. Operator : HAICHAN NIU  
Acq. Instrument : Instrument 1 Location : -  
Injection Date : 12/17/2014 1:24:43 PM  
Acq. Method : C:\CHEM32\1\METHODS\GRAD 2 50-90 ACN.M  
Last changed : 12/17/2014 1:22:13 PM by HAICHAN NIU  
Analysis Method : C:\CHEM32\1\DATA\ZHE\141217ZS\_II\_394.D\DA.M (GRAD 2 50-90 ACN.M)  
Last changed : 12/30/2014 4:47:19 PM by ERICAP  
Sample Info : GRAD 2 50 -90 ACN  
C13indole  
20141217

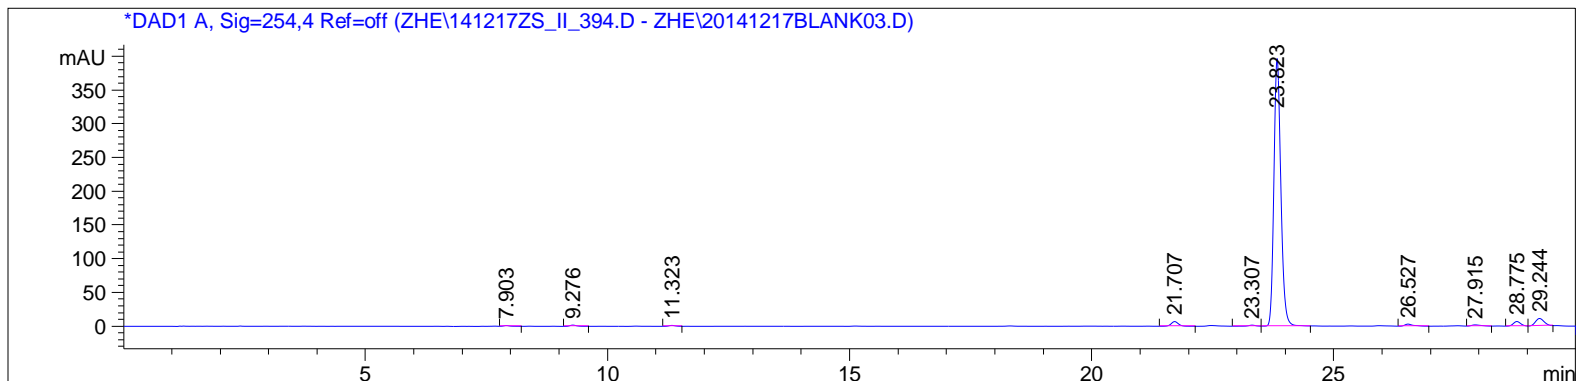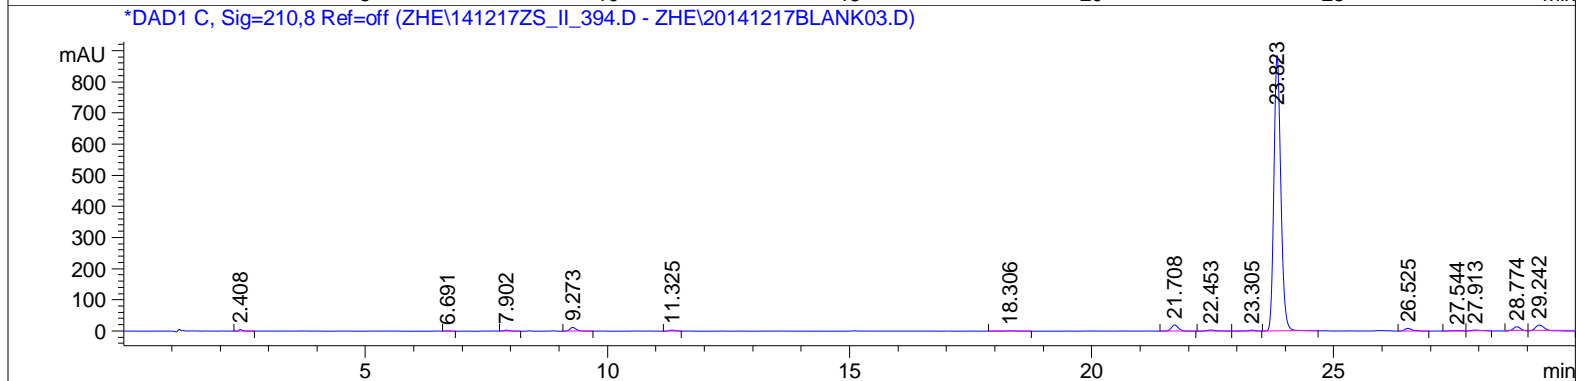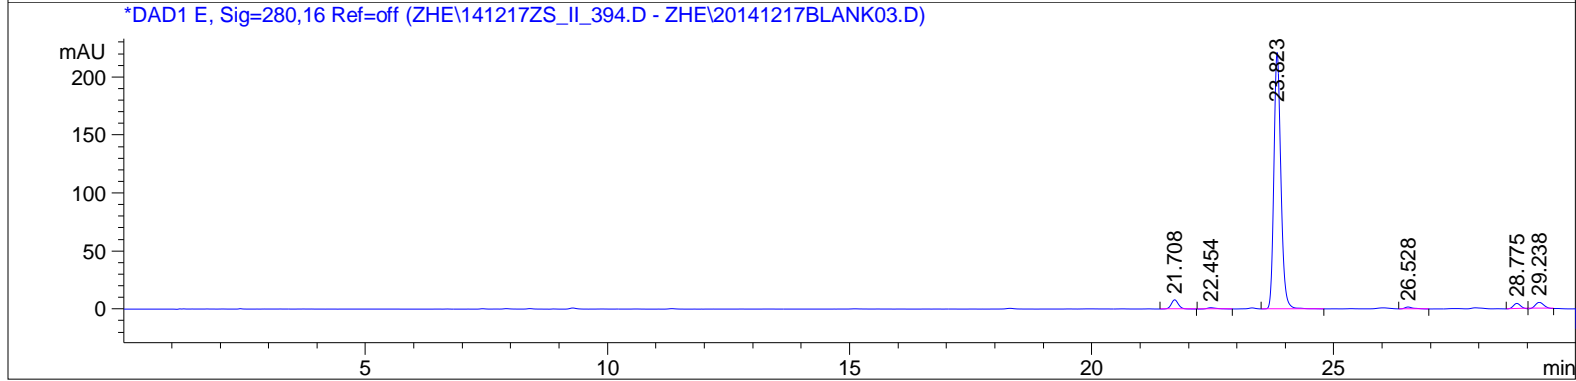

Sample Name: C13indole

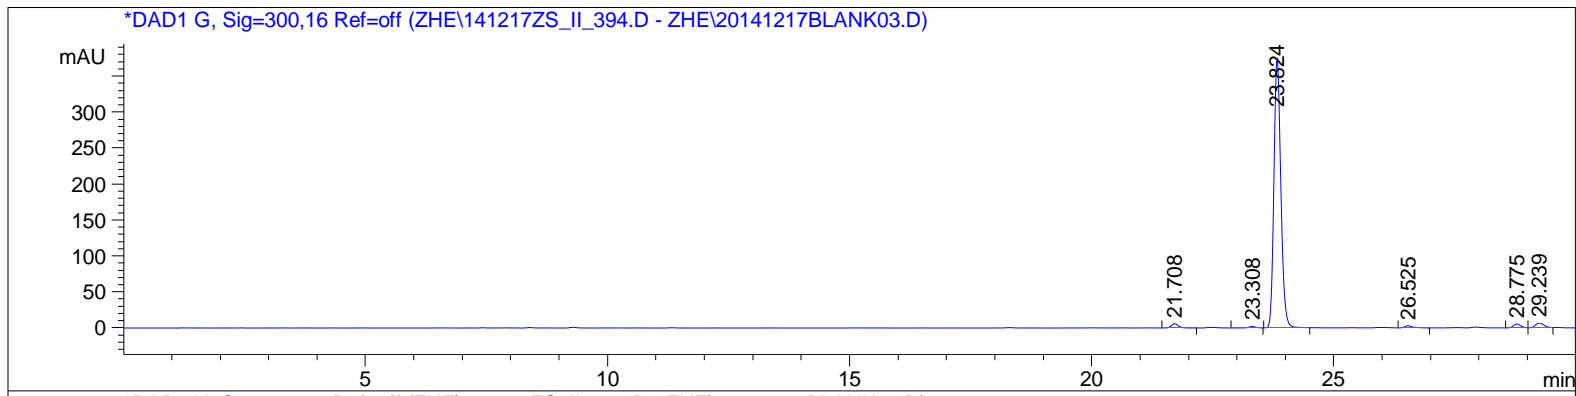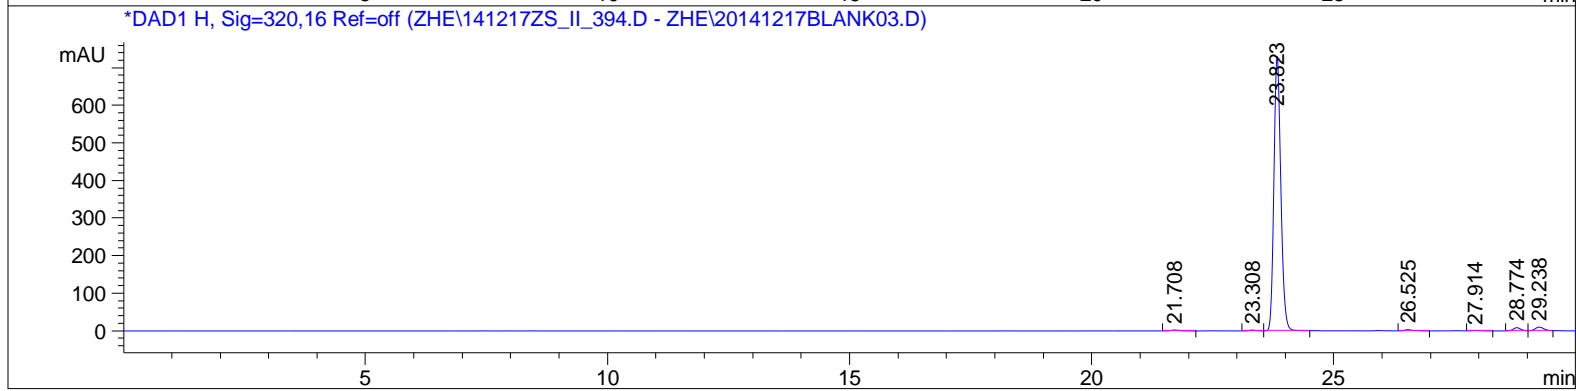

=====  
 Area Percent Report  
 =====

Sorted By : Signal  
 Multiplier : 1.0000  
 Dilution : 1.0000  
 Use Multiplier & Dilution Factor with ISTDs

Signal 1: DAD1 A, Sig=254,4 Ref=off  
 Signal has been modified after loading from rawdata file!

| Peak # | RetTime [min] | Type | Width [min] | Area [mAU*s] | Height [mAU] | Area %  |
|--------|---------------|------|-------------|--------------|--------------|---------|
| 1      | 7.903         | BB   | 0.1237      | 8.97274      | 1.09440      | 0.2070  |
| 2      | 9.276         | BB   | 0.1403      | 16.84550     | 1.81463      | 0.3886  |
| 3      | 11.323        | BB   | 0.1362      | 12.08191     | 1.35247      | 0.2787  |
| 4      | 21.707        | BB   | 0.1573      | 72.22176     | 6.94540      | 1.6662  |
| 5      | 23.307        | BB   | 0.1472      | 14.23725     | 1.49431      | 0.3285  |
| 6      | 23.823        | BB   | 0.1541      | 3944.59912   | 396.45770    | 91.0046 |
| 7      | 26.527        | BB   | 0.1736      | 37.00466     | 3.09254      | 0.8537  |
| 8      | 27.915        | BB   | 0.1954      | 23.40132     | 1.75668      | 0.5399  |
| 9      | 28.775        | BB   | 0.1618      | 70.08858     | 6.71465      | 1.6170  |
| 10     | 29.244        | BB   | 0.1943      | 135.05341    | 10.91752     | 3.1158  |

Totals : 4334.50624 431.64030

Sample Name: C13indole

Signal 2: DAD1 C, Sig=210,8 Ref=off

Signal has been modified after loading from rawdata file!

| Peak # | RetTime [min] | Type | Width [min] | Area [mAU*s] | Height [mAU] | Area %  |
|--------|---------------|------|-------------|--------------|--------------|---------|
| 1      | 2.408         | BB   | 0.0683      | 22.30968     | 4.97948      | 0.2266  |
| 2      | 6.691         | VB   | 0.1052      | 8.28824      | 1.19031      | 0.0842  |
| 3      | 7.902         | BB   | 0.1218      | 25.92144     | 3.22458      | 0.2633  |
| 4      | 9.273         | BB   | 0.1402      | 112.41674    | 12.11774     | 1.1418  |
| 5      | 11.325        | BB   | 0.1379      | 28.51899     | 3.20380      | 0.2897  |
| 6      | 18.306        | BB   | 0.1813      | 17.94281     | 1.44024      | 0.1823  |
| 7      | 21.708        | BB   | 0.1557      | 202.23770    | 19.70864     | 2.0542  |
| 8      | 22.453        | BB   | 0.1920      | 45.83818     | 3.47165      | 0.4656  |
| 9      | 23.305        | BB   | 0.1578      | 29.30734     | 2.80739      | 0.2977  |
| 10     | 23.823        | BB   | 0.1541      | 8799.65332   | 884.17999    | 89.3806 |
| 11     | 26.525        | BB   | 0.1619      | 95.05730     | 8.80946      | 0.9655  |
| 12     | 27.544        | BV   | 0.2140      | 17.40180     | 1.16646      | 0.1768  |
| 13     | 27.913        | VB   | 0.1982      | 39.21973     | 2.89218      | 0.3984  |
| 14     | 28.774        | BV   | 0.1639      | 143.44379    | 13.50203     | 1.4570  |
| 15     | 29.242        | VB   | 0.2077      | 257.59482    | 19.05302     | 2.6165  |

Totals :                                   9845.15189   981.74698

Signal 3: DAD1 E, Sig=280,16 Ref=off

Signal has been modified after loading from rawdata file!

| Peak # | RetTime [min] | Type | Width [min] | Area [mAU*s] | Height [mAU] | Area %  |
|--------|---------------|------|-------------|--------------|--------------|---------|
| 1      | 21.708        | BB   | 0.1556      | 81.35815     | 7.93701      | 3.3271  |
| 2      | 22.454        | BB   | 0.1947      | 14.99190     | 1.10235      | 0.6131  |
| 3      | 23.823        | BB   | 0.1549      | 2214.12866   | 221.04308    | 90.5459 |
| 4      | 26.528        | BB   | 0.1712      | 19.06033     | 1.62073      | 0.7795  |
| 5      | 28.775        | BB   | 0.1619      | 48.55169     | 4.64699      | 1.9855  |
| 6      | 29.238        | BB   | 0.1939      | 67.21884     | 5.44941      | 2.7489  |

Totals :                                   2445.30957   241.79956

Signal 4: DAD1 G, Sig=300,16 Ref=off

Signal has been modified after loading from rawdata file!

| Peak # | RetTime [min] | Type | Width [min] | Area [mAU*s] | Height [mAU] | Area %  |
|--------|---------------|------|-------------|--------------|--------------|---------|
| 1      | 21.708        | BB   | 0.1539      | 59.15012     | 5.85095      | 1.4892  |
| 2      | 23.308        | BB   | 0.1493      | 18.53098     | 1.90773      | 0.4666  |
| 3      | 23.824        | BB   | 0.1539      | 3725.80444   | 375.04620    | 93.8063 |



Sample Name: C13indole

| Peak # | RetTime [min] | Type | Width [min] | Area [mAU*s] | Height [mAU] | Area % |
|--------|---------------|------|-------------|--------------|--------------|--------|
| 4      | 26.525        | BB   | 0.1657      | 34.37233     | 3.04487      | 0.8654 |
| 5      | 28.775        | BB   | 0.1619      | 55.19741     | 5.28453      | 1.3897 |
| 6      | 29.239        | BB   | 0.1927      | 78.75215     | 6.43651      | 1.9828 |

Totals : 3971.80744 397.57080

Signal 5: DAD1 H, Sig=320,16 Ref=off

Signal has been modified after loading from rawdata file!

| Peak # | RetTime [min] | Type | Width [min] | Area [mAU*s] | Height [mAU] | Area %  |
|--------|---------------|------|-------------|--------------|--------------|---------|
| 1      | 21.708        | BB   | 0.1544      | 23.81687     | 2.34698      | 0.3156  |
| 2      | 23.308        | BB   | 0.1461      | 19.31839     | 2.04754      | 0.2560  |
| 3      | 23.823        | BB   | 0.1537      | 7247.35693   | 730.59741    | 96.0400 |
| 4      | 26.525        | BB   | 0.1665      | 35.64434     | 3.13880      | 0.4723  |
| 5      | 27.914        | BB   | 0.1906      | 13.79213     | 1.09783      | 0.1828  |
| 6      | 28.774        | BB   | 0.1616      | 87.57129     | 8.40103      | 1.1605  |
| 7      | 29.238        | BB   | 0.1930      | 118.68315    | 9.68232      | 1.5728  |

Totals : 7546.18311 757.31191

=====  
\*\*\* End of Report \*\*\*

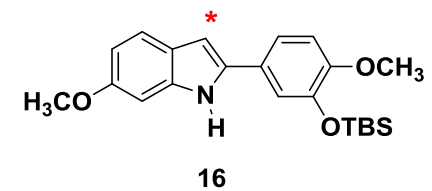

C:\Xcalibur...MTM\_IV\_43\_Orbi\_+ESI

8/21/2013 3:17:34 PM

MTM\_IV\_43

MTM\_IV\_43\_Orbi\_+ESI #50 RT: 0.39 AV: 1 NL  
T: FTMS + p ESI Full ms [100.00-450.00]

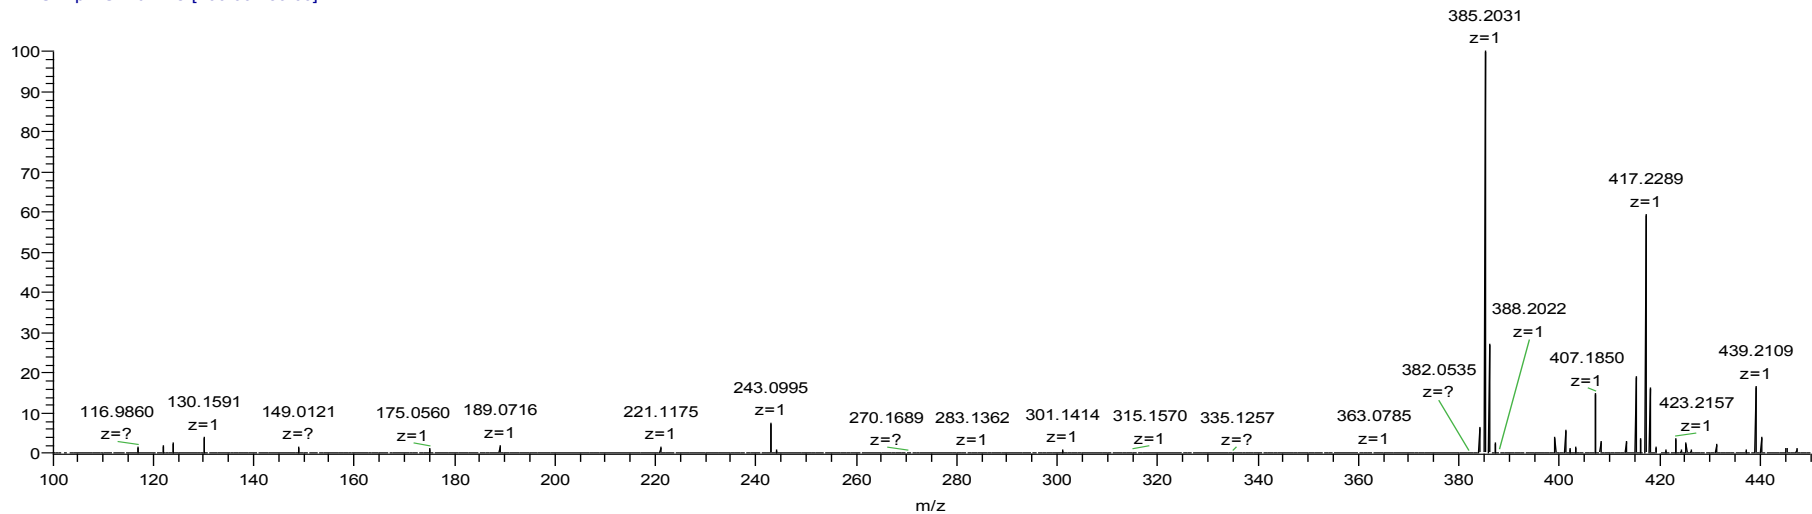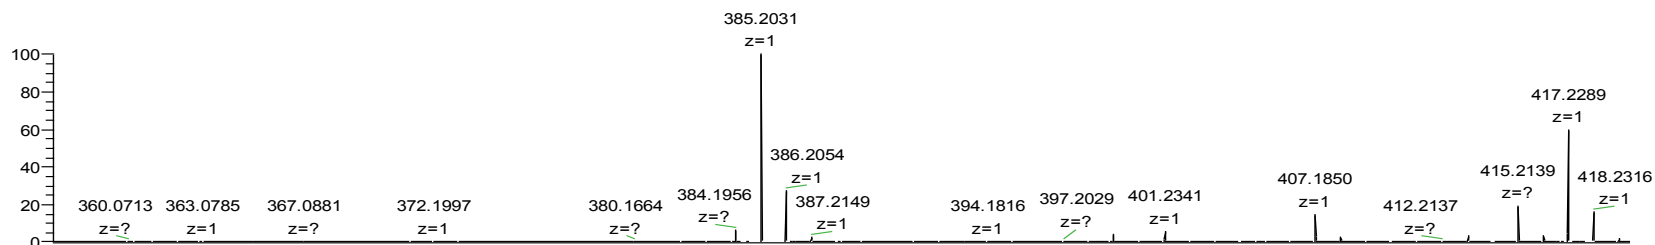

NL:  
2.50E8  
MTM\_IV\_43\_Orbi\_+  
ESI#50 RT: 0.39  
AV: 1 T: FTMS + p  
ESI Full ms  
[100.00-450.00]

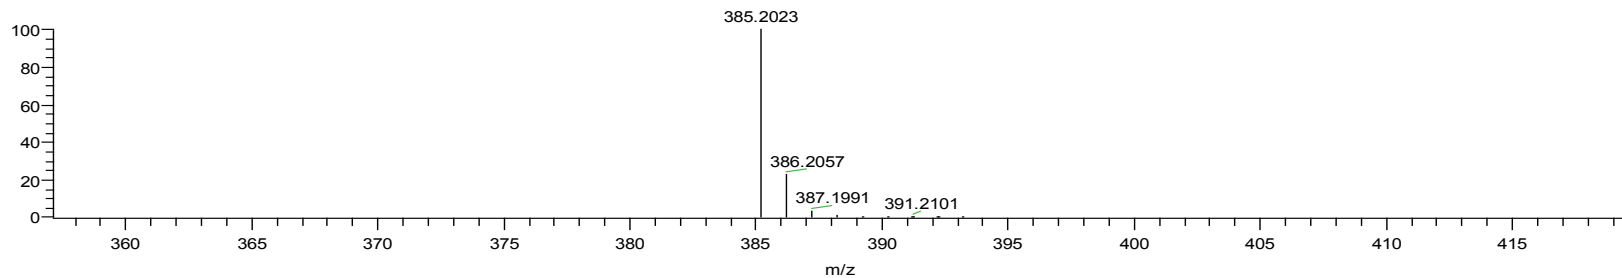

NL:  
7.25E5  
C<sub>21</sub><sup>13</sup>CH<sub>30</sub>NO<sub>3</sub>Si:  
C<sub>21</sub><sup>13</sup>C<sub>1</sub>H<sub>30</sub>N<sub>1</sub>O<sub>3</sub>Si<sub>1</sub>  
pa Chrg 1

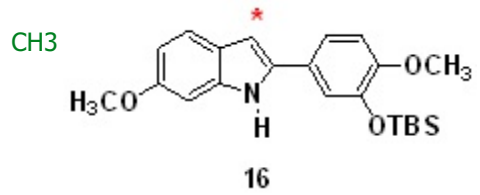

CH2

CH

Cq

All

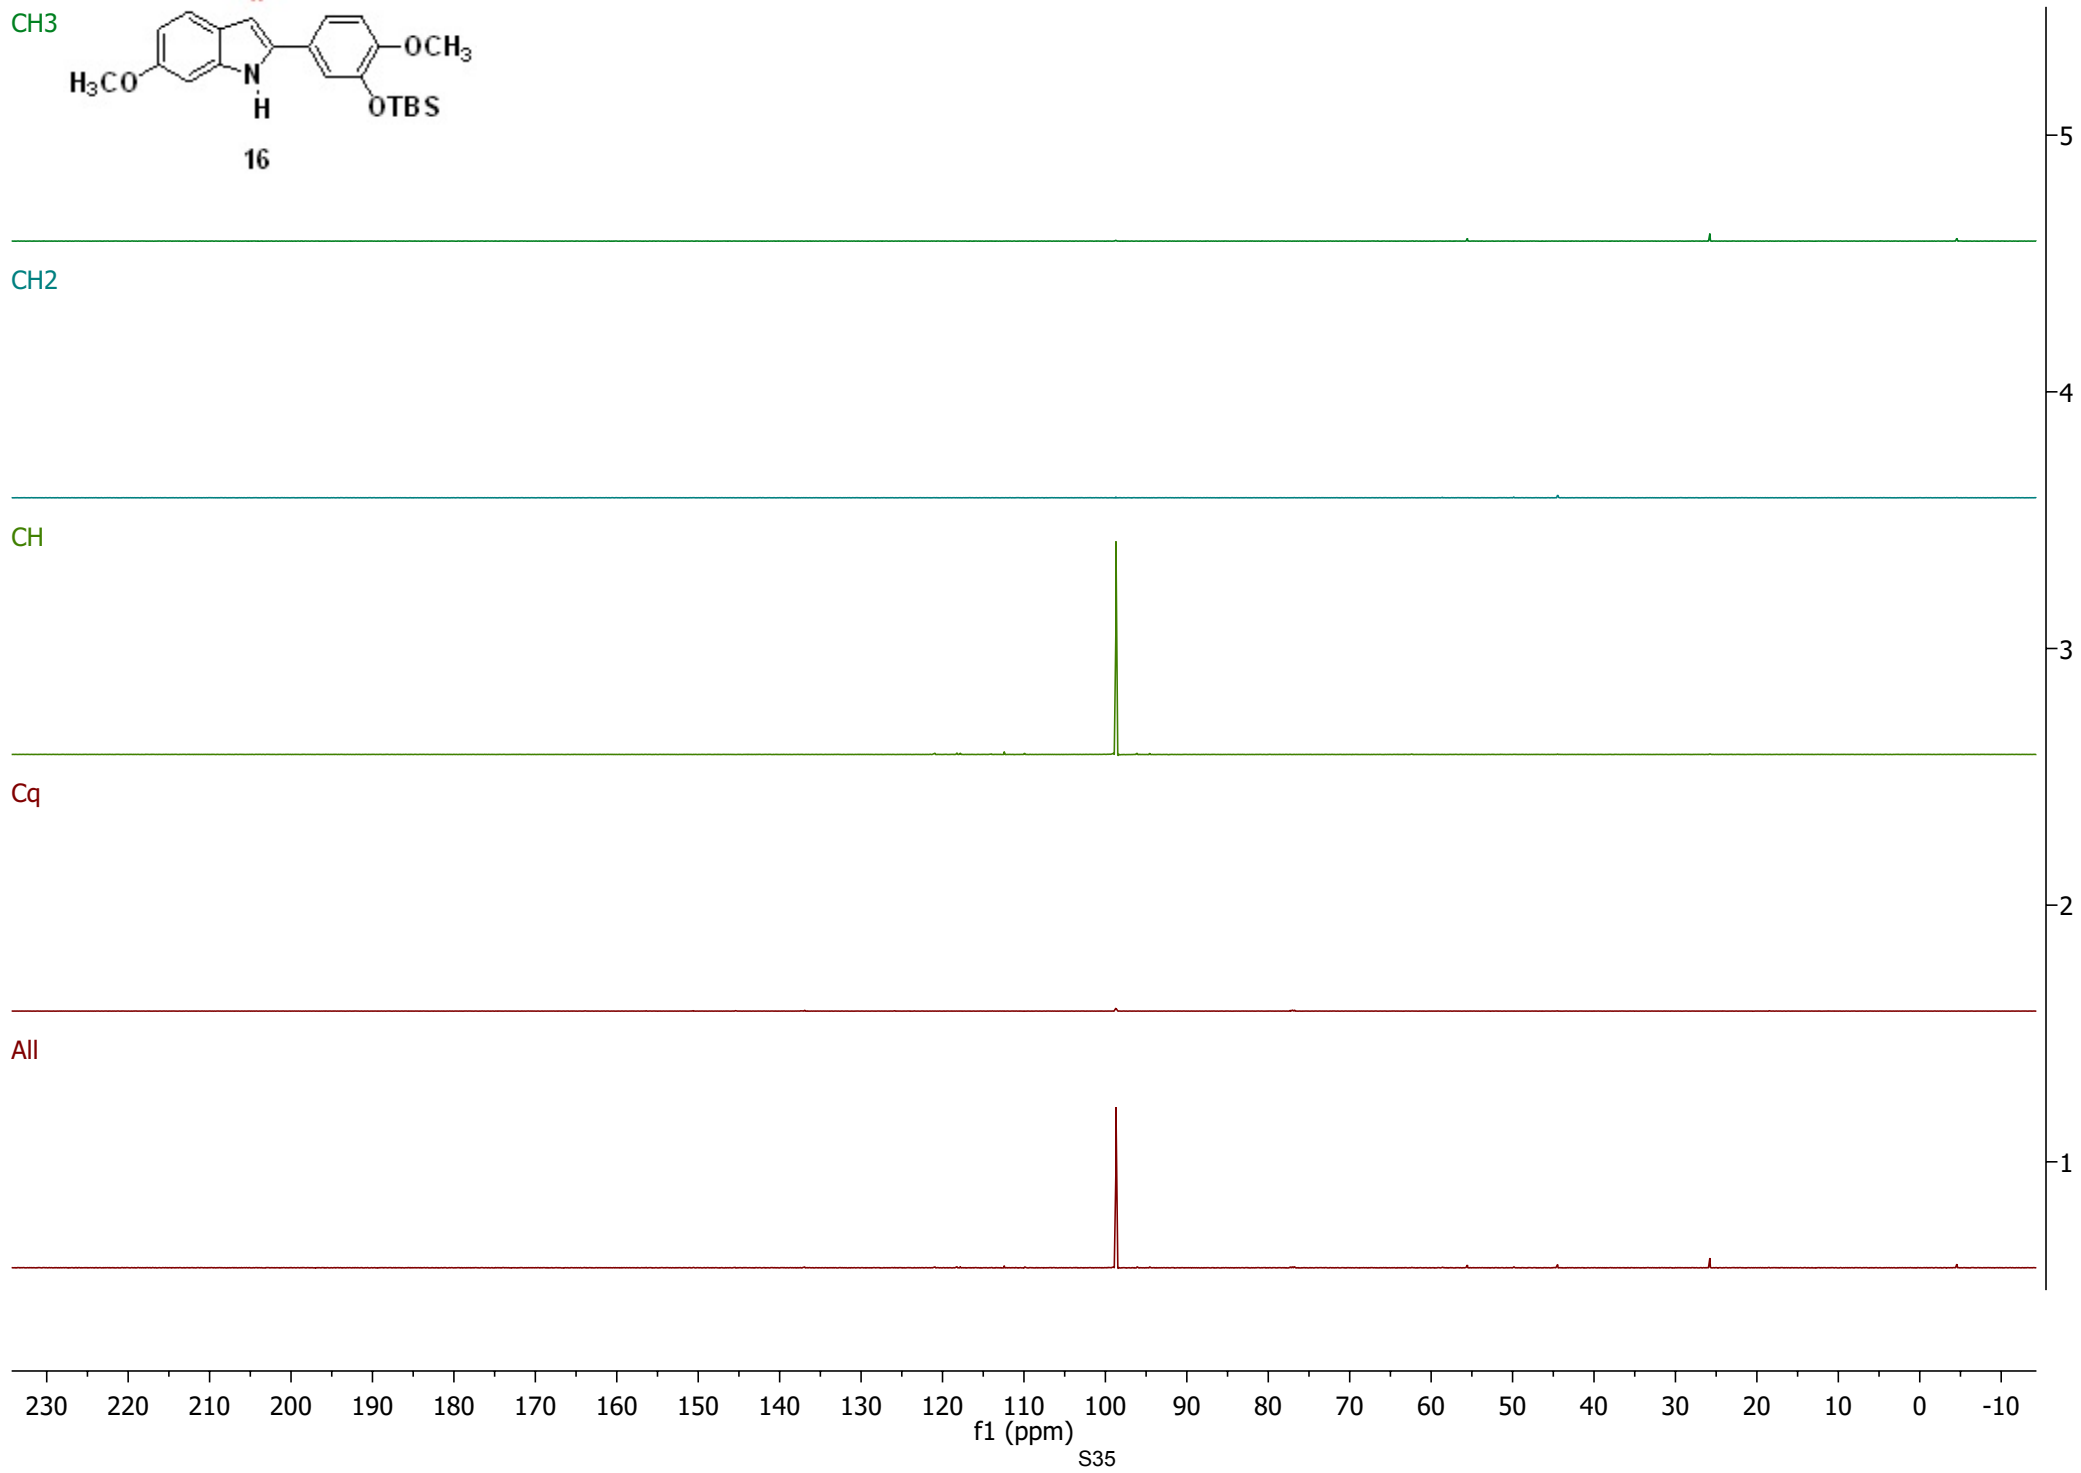

**Predicted (ChemBioDraw, Version 13.0.2.3020 ) <sup>13</sup>C NMR**  
**Values for Possible Indole Regioisomers**

**Indole Regioisomers as Possible Products Under Bischler-Mohrlau Reaction Conditions**

Cyclization *para* to methoxy group

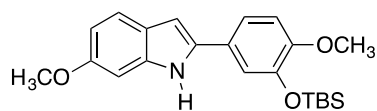

(with rearrangement)

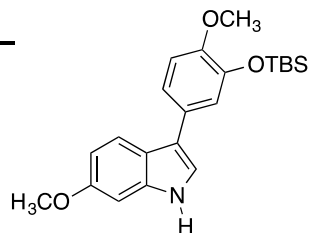

(no rearrangement)

Cyclization *ortho* to methoxy group

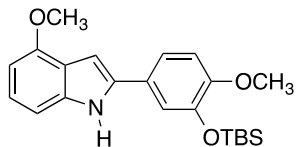

(with rearrangement)

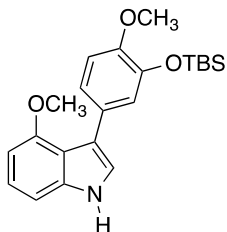

(no rearrangement)

**<sup>13</sup>C-NMR Predicted (ChemBioDraw, Version 13.0.2.3020) Chemical Shifts for Possible Indole Regioisomers**

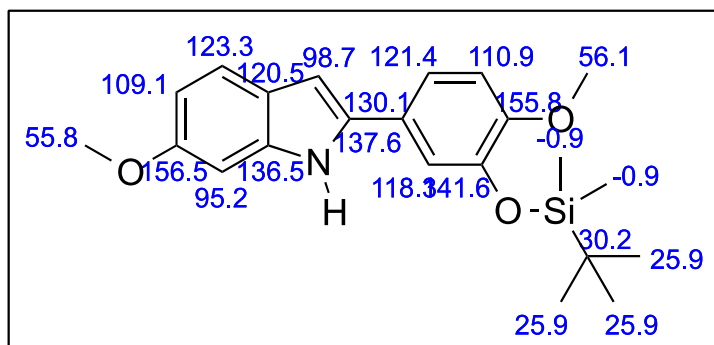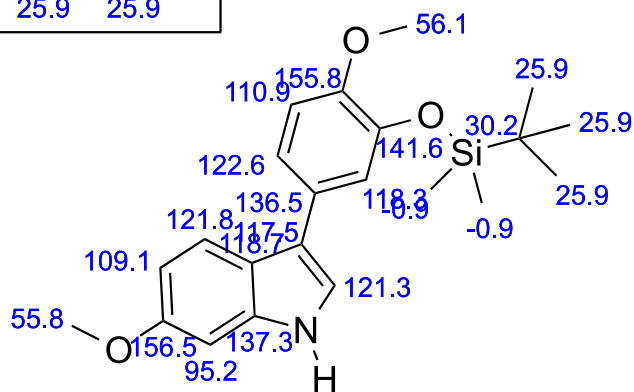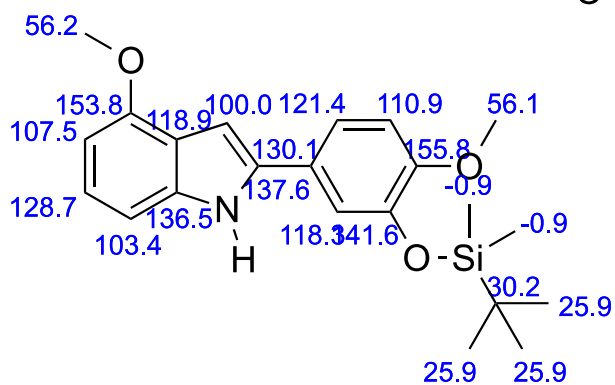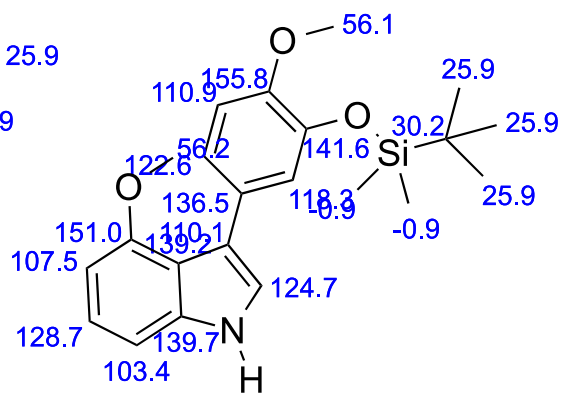

## X-ray Crystallographic Data for $^{13}\text{C}$ Labeled Indole 16

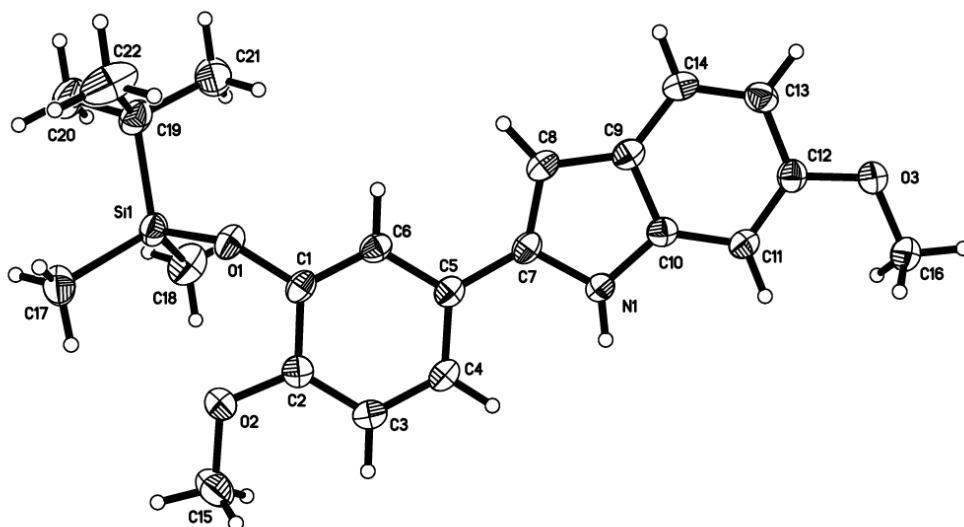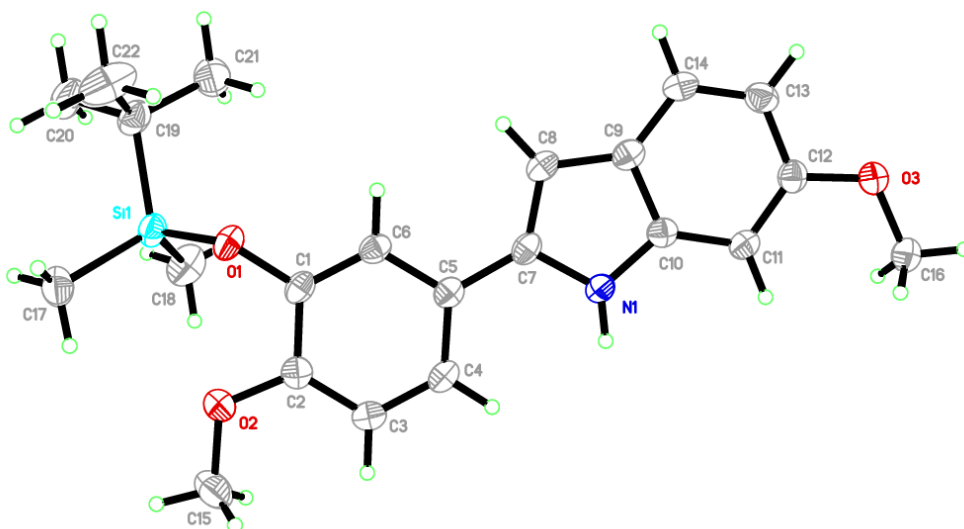

Table S1. Crystal data and structure refinement for Indole **16**.

|                                   |                                                     |                    |
|-----------------------------------|-----------------------------------------------------|--------------------|
| Identification code               | kp66                                                |                    |
| Empirical formula                 | C <sub>22</sub> H <sub>29</sub> N O <sub>3</sub> Si |                    |
| Formula weight                    | 383.55                                              |                    |
| Temperature                       | 150(2) K                                            |                    |
| Wavelength                        | 0.71073 Å                                           |                    |
| Crystal system                    | Monoclinic                                          |                    |
| Space group                       | P2(1)/c                                             |                    |
| Unit cell dimensions              | a = 12.5182(6) Å                                    | α = 90°.           |
|                                   | b = 23.1476(10) Å                                   | β = 100.7843(17)°. |
|                                   | c = 7.5208(3) Å                                     | γ = 90°.           |
| Volume                            | 2140.79(16) Å <sup>3</sup>                          |                    |
| Z                                 | 4                                                   |                    |
| Density (calculated)              | 1.190 Mg/m <sup>3</sup>                             |                    |
| Absorption coefficient            | 0.130 mm <sup>-1</sup>                              |                    |
| F(000)                            | 824                                                 |                    |
| Crystal size                      | 0.38 x 0.16 x 0.12 mm <sup>3</sup>                  |                    |
| Theta range for data collection   | 2.42 to 26.85°.                                     |                    |
| Index ranges                      | -15 ≤ h ≤ 15, -29 ≤ k ≤ 25, -9 ≤ l ≤ 9              |                    |
| Reflections collected             | 25973                                               |                    |
| Independent reflections           | 4565 [R(int) = 0.0410]                              |                    |
| Completeness to theta = 26.85°    | 99.4 %                                              |                    |
| Absorption correction             | Semi-empirical from equivalents                     |                    |
| Max. and min. transmission        | 0.9843 and 0.9526                                   |                    |
| Refinement method                 | Full-matrix least-squares on F <sup>2</sup>         |                    |
| Data / restraints / parameters    | 4565 / 0 / 251                                      |                    |
| Goodness-of-fit on F <sup>2</sup> | 1.569                                               |                    |
| Final R indices [I > 2σ(I)]       | R1 = 0.0419, wR2 = 0.1071                           |                    |
| R indices (all data)              | R1 = 0.0590, wR2 = 0.1115                           |                    |
| Largest diff. peak and hole       | 0.307 and -0.225 e.Å <sup>-3</sup>                  |                    |

Table S2. Atomic coordinates ( $\times 10^4$ ) and equivalent isotropic displacement parameters ( $\text{\AA}^2 \times 10^3$ ) for indole **16**.  $U(\text{eq})$  is defined as one third of the trace of the orthogonalized  $U^{ij}$  tensor.

|       | x        | y       | z        | $U(\text{eq})$ |
|-------|----------|---------|----------|----------------|
| Si(1) | -2359(1) | 615(1)  | 10812(1) | 28(1)          |
| O(1)  | -1718(1) | 1161(1) | 9999(1)  | 29(1)          |
| O(2)  | -1373(1) | 1655(1) | 13280(1) | 33(1)          |
| O(3)  | 5990(1)  | 2021(1) | 6358(1)  | 33(1)          |
| N(1)  | 2891(1)  | 1943(1) | 9526(2)  | 25(1)          |
| C(1)  | -729(1)  | 1406(1) | 10656(2) | 25(1)          |
| C(2)  | -534(1)  | 1682(1) | 12347(2) | 25(1)          |
| C(3)  | 451(1)   | 1958(1) | 12936(2) | 27(1)          |
| C(4)  | 1238(1)  | 1962(1) | 11862(2) | 27(1)          |
| C(5)  | 1069(1)  | 1687(1) | 10190(2) | 23(1)          |
| C(6)  | 65(1)    | 1405(1) | 9622(2)  | 25(1)          |
| C(7)  | 1881(1)  | 1681(1) | 9018(2)  | 24(1)          |
| C(8)  | 1838(1)  | 1437(1) | 7346(2)  | 26(1)          |
| C(9)  | 2848(1)  | 1544(1) | 6794(2)  | 25(1)          |
| C(10) | 3495(1)  | 1863(1) | 8189(2)  | 24(1)          |
| C(11) | 4555(1)  | 2038(1) | 8135(2)  | 25(1)          |
| C(12) | 4965(1)  | 1880(1) | 6621(2)  | 26(1)          |
| C(13) | 4339(1)  | 1563(1) | 5201(2)  | 29(1)          |
| C(14) | 3297(1)  | 1398(1) | 5277(2)  | 29(1)          |
| C(15) | -1193(1) | 1901(1) | 15046(2) | 45(1)          |
| C(16) | 6666(1)  | 2332(1) | 7773(2)  | 38(1)          |
| C(17) | -3537(1) | 901(1)  | 11724(2) | 45(1)          |
| C(18) | -1395(1) | 230(1)  | 12588(2) | 45(1)          |
| C(19) | -2826(1) | 149(1)  | 8766(2)  | 34(1)          |
| C(20) | -3455(1) | -377(1) | 9276(2)  | 43(1)          |
| C(21) | -1833(2) | -63(1)  | 8029(3)  | 57(1)          |
| C(22) | -3569(2) | 496(1)  | 7300(3)  | 59(1)          |



Table S3. Bond lengths [ $\text{\AA}$ ] and angles [ $^\circ$ ] for indole **16**.

---

|                   |            |
|-------------------|------------|
| Si(1)-O(1)        | 1.6721(10) |
| Si(1)-C(18)       | 1.8536(16) |
| Si(1)-C(17)       | 1.8602(16) |
| Si(1)-C(19)       | 1.8804(16) |
| O(1)-C(1)         | 1.3674(16) |
| O(2)-C(2)         | 1.3690(17) |
| O(2)-C(15)        | 1.4236(18) |
| O(3)-C(12)        | 1.3744(17) |
| O(3)-C(16)        | 1.4253(17) |
| N(1)-C(10)        | 1.3785(17) |
| N(1)-C(7)         | 1.3892(17) |
| C(1)-C(6)         | 1.3717(19) |
| C(1)-C(2)         | 1.403(2)   |
| C(2)-C(3)         | 1.386(2)   |
| C(3)-C(4)         | 1.385(2)   |
| C(4)-C(5)         | 1.3909(19) |
| C(5)-C(6)         | 1.4090(19) |
| C(5)-C(7)         | 1.4651(19) |
| C(7)-C(8)         | 1.3703(19) |
| C(8)-C(9)         | 1.4244(19) |
| C(9)-C(14)        | 1.404(2)   |
| C(9)-C(10)        | 1.4078(19) |
| C(10)-C(11)       | 1.3953(19) |
| C(11)-C(12)       | 1.382(2)   |
| C(12)-C(13)       | 1.4077(19) |
| C(13)-C(14)       | 1.371(2)   |
| C(19)-C(22)       | 1.531(2)   |
| C(19)-C(21)       | 1.533(2)   |
| C(19)-C(20)       | 1.538(2)   |
| O(1)-Si(1)-C(18)  | 109.52(6)  |
| O(1)-Si(1)-C(17)  | 109.55(7)  |
| C(18)-Si(1)-C(17) | 111.09(8)  |
| O(1)-Si(1)-C(19)  | 103.37(6)  |

|                   |            |
|-------------------|------------|
| C(18)-Si(1)-C(19) | 111.97(8)  |
| C(17)-Si(1)-C(19) | 111.05(7)  |
| C(1)-O(1)-Si(1)   | 130.24(9)  |
| C(2)-O(2)-C(15)   | 117.18(12) |
| C(12)-O(3)-C(16)  | 116.89(11) |
| C(10)-N(1)-C(7)   | 109.62(12) |
| O(1)-C(1)-C(6)    | 119.82(12) |
| O(1)-C(1)-C(2)    | 120.58(13) |
| C(6)-C(1)-C(2)    | 119.54(13) |
| O(2)-C(2)-C(3)    | 125.42(13) |
| O(2)-C(2)-C(1)    | 115.06(12) |
| C(3)-C(2)-C(1)    | 119.52(14) |
| C(4)-C(3)-C(2)    | 120.28(14) |
| C(3)-C(4)-C(5)    | 121.31(13) |
| C(4)-C(5)-C(6)    | 117.51(13) |
| C(4)-C(5)-C(7)    | 122.88(13) |
| C(6)-C(5)-C(7)    | 119.61(12) |
| C(1)-C(6)-C(5)    | 121.83(13) |
| C(8)-C(7)-N(1)    | 108.04(12) |
| C(8)-C(7)-C(5)    | 130.01(13) |
| N(1)-C(7)-C(5)    | 121.95(12) |
| C(7)-C(8)-C(9)    | 108.10(12) |
| C(14)-C(9)-C(10)  | 118.06(13) |
| C(14)-C(9)-C(8)   | 134.94(13) |
| C(10)-C(9)-C(8)   | 106.99(12) |
| N(1)-C(10)-C(11)  | 129.53(13) |
| N(1)-C(10)-C(9)   | 107.25(12) |
| C(11)-C(10)-C(9)  | 123.21(13) |
| C(12)-C(11)-C(10) | 116.66(13) |
| O(3)-C(12)-C(11)  | 123.82(13) |
| O(3)-C(12)-C(13)  | 114.63(12) |
| C(11)-C(12)-C(13) | 121.54(13) |
| C(14)-C(13)-C(12) | 120.84(13) |
| C(13)-C(14)-C(9)  | 119.67(13) |
| C(22)-C(19)-C(21) | 109.39(15) |
| C(22)-C(19)-C(20) | 108.96(13) |

|                   |            |
|-------------------|------------|
| C(21)-C(19)-C(20) | 108.91(13) |
| C(22)-C(19)-Si(1) | 110.02(11) |
| C(21)-C(19)-Si(1) | 109.30(11) |
| C(20)-C(19)-Si(1) | 110.23(11) |

---

Symmetry transformations used to generate equivalent atoms:

Table S4. Anisotropic displacement parameters ( $\text{\AA}^2 \times 10^3$ ) for indole **16**. The anisotropic displacement factor exponent takes the form:  $-2\pi^2 [ h^2 a^{*2} U^{11} + \dots + 2 h k a^* b^* U^{12} ]$

|       | U <sup>11</sup> | U <sup>22</sup> | U <sup>33</sup> | U <sup>23</sup> | U <sup>13</sup> | U <sup>12</sup> |
|-------|-----------------|-----------------|-----------------|-----------------|-----------------|-----------------|
| Si(1) | 24(1)           | 25(1)           | 35(1)           | 0(1)            | 7(1)            | -4(1)           |
| O(1)  | 25(1)           | 29(1)           | 32(1)           | 1(1)            | 2(1)            | -7(1)           |
| O(2)  | 31(1)           | 35(1)           | 35(1)           | -7(1)           | 12(1)           | -2(1)           |
| O(3)  | 28(1)           | 38(1)           | 33(1)           | -6(1)           | 10(1)           | -6(1)           |
| N(1)  | 26(1)           | 25(1)           | 24(1)           | -2(1)           | 4(1)            | -4(1)           |
| C(1)  | 24(1)           | 18(1)           | 30(1)           | 3(1)            | 1(1)            | -3(1)           |
| C(2)  | 27(1)           | 22(1)           | 28(1)           | 2(1)            | 6(1)            | 1(1)            |
| C(3)  | 30(1)           | 26(1)           | 25(1)           | -2(1)           | 2(1)            | 0(1)            |
| C(4)  | 24(1)           | 24(1)           | 30(1)           | 0(1)            | -1(1)           | -4(1)           |
| C(5)  | 25(1)           | 19(1)           | 25(1)           | 4(1)            | 2(1)            | -1(1)           |
| C(6)  | 29(1)           | 20(1)           | 24(1)           | 1(1)            | 2(1)            | -3(1)           |
| C(7)  | 23(1)           | 19(1)           | 28(1)           | 3(1)            | 1(1)            | -2(1)           |
| C(8)  | 25(1)           | 21(1)           | 29(1)           | -1(1)           | -1(1)           | -2(1)           |
| C(9)  | 28(1)           | 19(1)           | 26(1)           | 1(1)            | 1(1)            | 0(1)            |
| C(10) | 29(1)           | 18(1)           | 24(1)           | 2(1)            | 4(1)            | 0(1)            |
| C(11) | 26(1)           | 22(1)           | 27(1)           | -2(1)           | 2(1)            | -2(1)           |
| C(12) | 28(1)           | 23(1)           | 29(1)           | 3(1)            | 6(1)            | 0(1)            |
| C(13) | 34(1)           | 26(1)           | 28(1)           | -3(1)           | 9(1)            | 2(1)            |
| C(14) | 32(1)           | 25(1)           | 28(1)           | -5(1)           | 1(1)            | 0(1)            |
| C(15) | 38(1)           | 67(1)           | 32(1)           | -5(1)           | 10(1)           | 9(1)            |
| C(16) | 30(1)           | 45(1)           | 42(1)           | -10(1)          | 12(1)           | -10(1)          |
| C(17) | 36(1)           | 46(1)           | 58(1)           | -10(1)          | 19(1)           | -9(1)           |
| C(18) | 47(1)           | 36(1)           | 48(1)           | 10(1)           | 0(1)            | -4(1)           |
| C(19) | 32(1)           | 26(1)           | 42(1)           | -3(1)           | 6(1)            | -7(1)           |
| C(20) | 35(1)           | 32(1)           | 60(1)           | -4(1)           | 6(1)            | -8(1)           |
| C(21) | 54(1)           | 50(1)           | 75(1)           | -29(1)          | 29(1)           | -18(1)          |
| C(22) | 77(2)           | 43(1)           | 48(1)           | 0(1)            | -14(1)          | -12(1)          |

NOTE:

Crystallographic data for <sup>13</sup>C labeled indole regioisomer **16** presented in this paper have been deposited with the Cambridge Crystallographic Data Centre (CCDC deposition number 1041417). Copies of the data can be obtained, free of charge, on application to CCDC, 12 Union Road, Cambridge CB2 1EZ, UK, (fax: +44-(0)1223-336033 or e-mail: deposit@ccdc.cam.ac.uk).
